# Supplementary material for: New π-stacking motifs for molecular semiconducting materials: bis(bis(8-quinolinyl)amide)metal(ii) complexes of Cr, Mn, Fe, and Zn
Source: Royal Society of Chemistry journal article supplement (doi:10.1039/d1ma00078k), 2021-01-01
Supplement: d1ma00078k1.pdf [file d1ma00078k1.pdf]

## Electronic Supplementary Information (ESI) for:

### **New $\pi$ -Stacking Motifs for Molecular Semiconducting Materials: Bis(bis(8-quinolinyl)amide)metal(II) Complexes of Cr, Mn, Fe, and Zn**

Georg Albrecht,<sup>ae#</sup> Harald Locke,<sup>be#</sup> Pascal Schweitzer,<sup>ae#</sup> Jonathan Becker,<sup>c</sup> Limei Chen,<sup>de</sup> Peter R. Schreiner,<sup>be\*</sup>  
and Derck Schlettwein<sup>ae\*</sup>

<sup>a</sup> Institute of Applied Physics, Justus Liebig University Giessen, Heinrich-Buff-Ring 16, 35392 Giessen, Germany.

<sup>b</sup> Institute of Organic Chemistry, Justus Liebig University Giessen, Heinrich-Buff-Ring 17, 35392 Giessen, Germany

<sup>c</sup> Institute of Inorganic and Analytical Chemistry, Justus Liebig University Giessen, Heinrich-Buff-Ring 17, 35392 Giessen, Germany.

<sup>d</sup> Institute for Experimental Physics I, Justus Liebig University Giessen, Heinrich-Buff-Ring 16, 35392 Giessen, Germany

<sup>e</sup> Center for Materials Research (LaMa), Justus Liebig University Giessen, Heinrich-Buff-Ring 16, 35392 Giessen, Germany

<sup>#</sup>These authors contributed equally

<sup>\*</sup>Corresponding authors

# Computational Results

Table S1 Cartesian coordinates in Å of optimized species:

| Zn(BQA) <sub>2</sub> (PBEPBE/ Def2TZVP, multiplicity = 6) |           |           |           |
|-----------------------------------------------------------|-----------|-----------|-----------|
| 1):                                                       |           |           |           |
| a.n.                                                      | X         | Y         | Z         |
| 7                                                         | 2.101049  | -0.000064 | -0.000211 |
| 6                                                         | 2.705588  | -1.039497 | -0.645106 |
| 6                                                         | 2.705890  | 1.039269  | 0.644558  |
| 6                                                         | 4.045176  | 1.464745  | 0.552761  |
| 6                                                         | 4.527845  | 2.570755  | 1.275867  |
| 6                                                         | 3.721353  | 3.304709  | 2.125419  |
| 6                                                         | 2.350091  | 2.96541   | 2.226889  |
| 6                                                         | 1.833814  | 1.859486  | 1.475761  |
| 7                                                         | 0.511110  | 1.550091  | 1.498774  |
| 6                                                         | -0.326269 | 2.249335  | 2.253754  |
| 6                                                         | 0.098371  | 3.324532  | 3.058425  |
| 6                                                         | 1.430749  | 3.681278  | 3.034047  |
| 6                                                         | 1.833219  | -1.859542 | -1.476169 |
| 6                                                         | 4.044811  | -1.465216 | -0.553539 |
| 6                                                         | 4.527157  | -2.571305 | -1.276741 |
| 6                                                         | 3.720386  | -3.305100 | -2.126165 |
| 6                                                         | 2.349168  | -2.965551 | -2.227396 |
| 6                                                         | 1.429559  | -3.681243 | -3.034406 |
| 1                                                         | 4.727871  | -0.955542 | 0.121695  |
| 1                                                         | 5.577887  | -2.847210 | -1.160104 |
| 1                                                         | 4.728030  | 0.954938  | -0.122581 |
| 1                                                         | 5.578605  | 2.846467  | 1.159047  |
| 1                                                         | 4.114394  | 4.144713  | 2.700574  |
| 1                                                         | -0.624759 | 3.864366  | 3.670738  |
| 1                                                         | 1.794883  | 4.523981  | 3.627118  |
| 1                                                         | -1.377911 | 1.952751  | 2.212673  |
| 1                                                         | 4.113176  | -4.145170 | -2.701396 |
| 6                                                         | 0.097242  | -3.324255 | -3.058551 |
| 7                                                         | 0.510569  | -1.549904 | -1.498952 |
| 6                                                         | -0.327064 | -2.248988 | -2.253795 |
| 1                                                         | -1.378646 | -1.952217 | -2.212526 |
| 1                                                         | 1.793439  | -4.524007 | -3.627549 |
| 1                                                         | -0.626092 | -3.863951 | -3.670745 |
| 30                                                        | 0.000000  | 0.000139  | 0.000003  |
| 1                                                         | -1.793602 | -4.523941 | 3.627555  |
| 1                                                         | 0.625948  | -3.863956 | 3.67077   |
| 6                                                         | -1.429692 | -3.681189 | 3.034413  |
| 6                                                         | -0.097365 | -3.32424  | 3.058569  |
| 1                                                         | -4.113320 | -4.145039 | 2.701383  |
| 6                                                         | -3.720501 | -3.304981 | 2.126153  |
| 6                                                         | -2.349274 | -2.965472 | 2.227395  |

  

| Fe(BQA) <sub>2</sub> (PBEPBE/ Def2TZVP, multiplicity = 6) |           |           |           |
|-----------------------------------------------------------|-----------|-----------|-----------|
| 1):                                                       |           |           |           |
| a.n.                                                      | X         | Y         | Z         |
| 7                                                         | -1.945946 | -0.000217 | 0.000810  |
| 6                                                         | -2.534341 | 0.945365  | -0.799694 |
| 6                                                         | -2.533304 | -0.946121 | 0.801698  |
| 6                                                         | -3.885824 | -1.305960 | 0.955721  |
| 6                                                         | -4.261811 | -2.320030 | 1.854750  |
| 6                                                         | -3.340172 | -3.006588 | 2.626705  |
| 6                                                         | -1.962048 | -2.706881 | 2.493292  |
| 6                                                         | -1.569432 | -1.691252 | 1.571482  |
| 7                                                         | -0.250504 | -1.370669 | 1.361636  |
| 6                                                         | 0.694268  | -2.010967 | 2.061046  |
| 6                                                         | 0.384723  | -3.009631 | 3.000470  |
| 6                                                         | -0.931708 | -3.362708 | 3.215948  |
| 6                                                         | -1.571345 | 1.690952  | -1.570143 |
| 6                                                         | -3.887137 | 1.304558  | -0.952812 |

|    |           |           |           |                                                        |           |           |           |
|----|-----------|-----------|-----------|--------------------------------------------------------|-----------|-----------|-----------|
| 6  | -4.264186 | 2.318518  | -1.851524 | 1                                                      | 3.655875  | -3.781555 | -3.326575 |
| 6  | -3.343381 | 3.005614  | -2.623997 | 6                                                      | 0.932235  | -3.362475 | -3.216054 |
| 6  | -1.965023 | 2.706560  | -2.491520 | 1                                                      | -1.723844 | -1.719392 | -1.858298 |
| 6  | -0.935446 | 3.363061  | -3.214648 | 6                                                      | -0.384241 | -3.009521 | -3.000651 |
| 1  | -4.662520 | 0.830314  | -0.360108 | 1                                                      | 1.196010  | -4.143173 | -3.932669 |
| 1  | -5.325095 | 2.563942  | -1.936927 | 1                                                      | -1.196726 | -3.496081 | -3.541398 |
| 1  | -4.661815 | -0.832098 | 0.363508  | Fe(BQA) <sub>2</sub> (PBEPBE/ Def2TZVP, multiplicity = |           |           |           |
| 1  | -5.322545 | -2.565959 | 1.940859  | 3):                                                    |           |           |           |
| 1  | -3.655293 | -3.782049 | 3.326634  | a.n.                                                   | X         | Y         | Z         |
| 1  | 1.197287  | -3.496131 | 3.541151  | 7                                                      | -1.914733 | 0.000084  | -0.000005 |
| 1  | -1.195369 | -4.143447 | 3.932560  | 6                                                      | -2.507687 | 1.033923  | -0.690253 |
| 1  | 1.724134  | -1.719339 | 1.858080  | 6                                                      | -2.507785 | -1.033700 | 0.690244  |
| 1  | -3.659337 | 3.781027  | -3.323603 | 6                                                      | -3.854679 | -1.446337 | 0.716532  |
| 6  | 0.381298  | 3.010627  | -3.000004 | 6                                                      | -4.246369 | -2.531891 | 1.516220  |
| 7  | -0.252145 | 1.370886  | -1.361262 | 6                                                      | -3.343702 | -3.237308 | 2.300351  |
| 6  | 0.691905  | 2.011864  | -2.061040 | 6                                                      | -1.969818 | -2.887539 | 2.279420  |
| 1  | 1.722027  | 1.720616  | -1.858816 | 6                                                      | -1.563703 | -1.795428 | 1.457326  |
| 1  | -1.199923 | 4.143827  | -3.930929 | 7                                                      | -0.250586 | -1.418648 | 1.344452  |
| 1  | 1.193293  | 3.497696  | -3.541027 | 6                                                      | 0.684920  | -2.072802 | 2.051436  |
| 26 | 0.000001  | 0.000113  | -0.000018 | 6                                                      | 0.361781  | -3.142679 | 2.896027  |
| 1  | 1.199286  | 4.143954  | 3.930977  | 6                                                      | -0.956197 | -3.557302 | 3.011855  |
| 1  | -1.193833 | 3.497475  | 3.541063  | 6                                                      | -1.563535 | 1.795560  | -1.457338 |
| 6  | 0.934926  | 3.363151  | 3.214692  | 6                                                      | -3.854543 | 1.446685  | -0.716541 |
| 6  | -0.381765 | 3.010526  | 3.000042  | 6                                                      | -4.246136 | 2.532263  | -1.516243 |
| 1  | 3.658747  | 3.781533  | 3.323650  | 6                                                      | -3.343405 | 3.237588  | -2.300383 |
| 6  | 3.342913  | 3.006076  | 2.624038  | 6                                                      | -1.969552 | 2.887700  | -2.279442 |
| 6  | 1.964603  | 2.706807  | 2.491562  | 6                                                      | -0.955868 | 3.557373  | -3.011874 |
| 6  | -0.692221 | 2.011720  | 2.061073  | 1                                                      | -4.598020 | 0.956327  | -0.093924 |
| 6  | 4.263823  | 2.319136  | 1.851551  | 1                                                      | -5.297702 | 2.826773  | -1.513666 |
| 1  | -1.722300 | 1.720321  | 1.858847  | 1                                                      | -4.598115 | -0.955900 | 0.093928  |
| 6  | 1.571076  | 1.691144  | 1.570180  | 1                                                      | -5.297961 | -2.826307 | 1.513638  |
| 1  | 5.324692  | 2.564732  | 1.936945  | 1                                                      | -3.673095 | -4.071404 | 2.922080  |
| 7  | 0.251924  | 1.370880  | 1.361301  | 1                                                      | 1.160490  | -3.639656 | 3.447291  |
| 6  | 3.886926  | 1.305127  | 0.952831  | 1                                                      | -1.225938 | -4.396876 | 3.655561  |
| 6  | 2.534187  | 0.945718  | 0.799720  | 1                                                      | 1.712070  | -1.731867 | 1.927555  |
| 1  | 4.661928  | -0.831551 | -0.363339 | 1                                                      | -3.672723 | 4.071704  | -2.922125 |
| 7  | 1.945946  | 0.000054  | -0.000799 | 6                                                      | 0.362074  | 3.142639  | -2.896034 |
| 1  | 4.662374  | 0.831020  | 0.360103  | 7                                                      | -0.250450 | 1.418669  | -1.344452 |
| 6  | 3.886019  | -1.305480 | -0.955608 | 6                                                      | 0.685116  | 2.072740  | -2.051434 |
| 6  | 2.533454  | -0.945775 | -0.801665 | 1                                                      | 1.712235  | 1.731714  | -1.927546 |
| 6  | 4.262157  | -2.319503 | -1.854627 | 1                                                      | -1.225533 | 4.396965  | -3.655586 |
| 1  | 5.322920  | -2.565331 | -1.940675 | 1                                                      | 1.160829  | 3.639547  | -3.447293 |
| 6  | 1.569702  | -1.691001 | -1.571508 | 26                                                     | -0.000156 | -0.000001 | -0.000001 |
| 7  | 0.250732  | -1.370554 | -1.361724 | 1                                                      | 1.225838  | 4.396861  | 3.655501  |
| 6  | 3.340632  | -3.006137 | -2.626651 | 1                                                      | -1.160640 | 3.639948  | 3.446701  |
| 6  | 1.962470  | -2.706571 | -2.493318 | 6                                                      | 0.956089  | 3.557395  | 3.011653  |
| 6  | -0.693939 | -2.010916 | -2.061215 | 6                                                      | -0.361863 | 3.142963  | 2.895543  |

|                                                        |           |           |           |    |           |           |           |
|--------------------------------------------------------|-----------|-----------|-----------|----|-----------|-----------|-----------|
| 1                                                      | 3.673055  | 4.071151  | 2.922622  | 6  | 1.981985  | 2.778362  | 2.409155  |
| 6                                                      | 3.343706  | 3.237178  | 2.300710  | 6  | 0.976858  | 3.423703  | 3.170418  |
| 6                                                      | 1.969795  | 2.887587  | 2.279351  | 1  | 4.589126  | 0.950514  | 0.097788  |
| 6                                                      | -0.684971 | 2.073220  | 2.050685  | 1  | 5.312913  | 2.740957  | 1.609301  |
| 6                                                      | 4.246433  | 2.531622  | 1.516818  | 1  | 4.589173  | -0.950369 | -0.097503 |
| 1                                                      | -1.712165 | 1.732551  | 1.926477  | 1  | 5.313121  | -2.740781 | -1.608976 |
| 6                                                      | 1.563734  | 1.795619  | 1.457061  | 1  | 3.701922  | -3.911135 | -3.096396 |
| 1                                                      | 5.298089  | 2.825817  | 1.514541  | 1  | -1.148300 | -3.508985 | -3.595953 |
| 7                                                      | 0.250568  | 1.419123  | 1.343791  | 1  | 1.253488  | -4.223250 | -3.859803 |
| 6                                                      | 3.854810  | 1.446107  | 0.717009  | 1  | -1.717206 | -1.708706 | -1.968065 |
| 6                                                      | 2.507883  | 1.033644  | 0.690232  | 1  | 3.701583  | 3.911238  | 3.096637  |
| 1                                                      | 4.598351  | -0.955923 | -0.094707 | 6  | -0.353968 | 3.032298  | 3.021602  |
| 7                                                      | 1.914921  | -0.000082 | 0.000007  | 7  | 0.252416  | 1.388006  | 1.383973  |
| 1                                                      | 4.598437  | 0.955525  | 0.094752  | 6  | -0.686190 | 2.023635  | 2.120419  |
| 6                                                      | 3.854691  | -1.446434 | -0.716980 | 1  | -1.717389 | 1.708584  | 1.968000  |
| 6                                                      | 2.507798  | -1.033859 | -0.690212 | 1  | 1.253095  | 4.223239  | 3.859917  |
| 6                                                      | 4.246231  | -2.531971 | -1.516800 | 1  | -1.148648 | 3.508866  | 3.595939  |
| 1                                                      | 5.297864  | -2.826251 | -1.514521 | 26 | 0.000007  | -0.000013 | -0.000001 |
| 6                                                      | 1.563589  | -1.795751 | -1.457051 | 1  | -1.253155 | 4.223297  | -3.859830 |
| 7                                                      | 0.250452  | -1.419152 | -1.343782 | 1  | 1.148615  | 3.509031  | -3.595795 |
| 6                                                      | 3.343451  | -3.237446 | -2.300703 | 6  | -0.976903 | 3.423745  | -3.170357 |
| 6                                                      | 1.969567  | -2.887748 | -2.279343 | 6  | 0.353937  | 3.032399  | -3.021509 |
| 6                                                      | -0.685136 | -2.073177 | -2.050676 | 1  | -3.701653 | 3.911148  | -3.096651 |
| 1                                                      | 3.672736  | -4.071439 | -2.922623 | 6  | -3.362649 | 3.108096  | -2.439917 |
| 6                                                      | 0.955809  | -3.557478 | -3.011645 | 6  | -1.982025 | 2.778326  | -2.409155 |
| 1                                                      | -1.712303 | -1.732424 | -1.926469 | 6  | 0.686174  | 2.023691  | -2.120380 |
| 6                                                      | -0.362111 | -3.142945 | -2.895533 | 6  | -4.262895 | 2.442275  | -1.609465 |
| 1                                                      | 1.225493  | -4.396963 | -3.655494 | 1  | 1.717379  | 1.708658  | -1.967966 |
| 1                                                      | -1.160927 | -3.639871 | -3.446688 | 6  | -1.566920 | 1.732674  | -1.532554 |
| Fe(BQA) <sub>2</sub> (PBEPBE/ Def2TZVP, multiplicity = |           |           |           | 1  | -5.312984 | 2.740731  | -1.609416 |
| 5):                                                    |           |           |           | 7  | -0.252430 | 1.387969  | -1.384011 |
| 7                                                      | 1.903933  | 0.000014  | 0.000070  | 6  | -3.861300 | 1.403745  | -0.764547 |
| 6                                                      | 2.504712  | 0.995653  | 0.745172  | 6  | -2.504717 | 0.995581  | -0.745209 |
| 6                                                      | 2.504797  | -0.995595 | -0.745006 | 1  | -4.589178 | -0.950252 | 0.097635  |
| 6                                                      | 3.861376  | -1.403789 | -0.764221 | 7  | -1.903917 | -0.000010 | -0.000070 |
| 6                                                      | 4.263037  | -2.442308 | -1.609119 | 1  | -4.589153 | 0.950290  | -0.097909 |
| 6                                                      | 3.362863  | -3.108099 | -2.439671 | 6  | -3.861369 | -1.403720 | 0.764313  |
| 6                                                      | 1.982238  | -2.778329 | -2.409015 | 6  | -2.504778 | -0.995582 | 0.745046  |
| 6                                                      | 1.567062  | -1.732700 | -1.532418 | 6  | -4.263029 | -2.442243 | 1.609208  |
| 7                                                      | 0.252556  | -1.388035 | -1.383943 | 1  | -5.313124 | -2.740678 | 1.609104  |
| 6                                                      | -0.685985 | -2.023715 | -2.120428 | 6  | -1.567037 | -1.732690 | 1.532444  |
| 6                                                      | -0.353672 | -3.032375 | -3.021581 | 7  | -0.252533 | -1.388006 | 1.383978  |
| 6                                                      | 0.977180  | -3.423719 | -3.170326 | 6  | -3.362838 | -3.108085 | 2.439705  |
| 6                                                      | 1.566900  | 1.732723  | 1.532528  | 6  | -1.982207 | -2.778342 | 2.409016  |
| 6                                                      | 3.861272  | 1.403904  | 0.764464  | 6  | 0.686023  | -2.023761 | 2.120379  |
| 6                                                      | 4.262842  | 2.442440  | 1.609386  | 1  | -3.701893 | -3.911134 | 3.096417  |
| 6                                                      | 3.362593  | 3.108190  | 2.439890  | 6  | -0.977135 | -3.423789 | 3.170260  |

|                                                         |           |           |           |                                                         |           |           |           |
|---------------------------------------------------------|-----------|-----------|-----------|---------------------------------------------------------|-----------|-----------|-----------|
| 1                                                       | 1.717242  | -1.708746 | 1.968019  | 6                                                       | -2.008123 | -2.709371 | 2.518045  |
| 6                                                       | 0.353721  | -3.032474 | 3.021478  | 6                                                       | 0.663980  | -2.043596 | 2.093793  |
| 1                                                       | -1.253439 | -4.223343 | 3.859712  | 6                                                       | -4.310113 | -2.306115 | 1.876125  |
| 1                                                       | 1.148361  | -3.509133 | 3.595794  | 1                                                       | 1.696071  | -1.767014 | 1.897756  |
| Fe(BQA) <sub>2</sub> (Blyp/def2tzvp, multiplicity = 1): |           |           |           | 6                                                       | -1.601917 | -1.696643 | 1.589524  |
| a.n.                                                    | X         | Y         | Z         | 1                                                       | -5.371019 | -2.541022 | 1.962722  |
| 7                                                       | 1.976144  | 0.000238  | 0.001077  | 7                                                       | -0.271805 | -1.391856 | 1.385849  |
| 6                                                       | 2.564582  | -0.944778 | -0.811054 | 6                                                       | -3.922798 | -1.297137 | 0.970554  |
| 6                                                       | 2.563295  | 0.945608  | 0.813731  | 6                                                       | -2.564468 | -0.944774 | 0.811198  |
| 6                                                       | 3.921299  | 1.298742  | 0.974215  | 1                                                       | -4.693766 | 0.822226  | -0.385210 |
| 6                                                       | 4.307340  | 2.307858  | 1.880171  | 7                                                       | -1.976089 | 0.000168  | -0.001014 |
| 6                                                       | 3.389076  | 2.999616  | 2.655392  | 1                                                       | -4.694537 | -0.820568 | 0.380996  |
| 6                                                       | 2.004624  | 2.709782  | 2.520246  | 6                                                       | -3.921352 | 1.298335  | -0.974256 |
| 6                                                       | 1.599686  | 1.697060  | 1.591150  | 6                                                       | -2.563318 | 0.945337  | -0.813798 |
| 7                                                       | 0.269883  | 1.391777  | 1.386216  | 6                                                       | -4.307497 | 2.307293  | -1.880344 |
| 6                                                       | -0.666774 | 2.042677  | 2.093756  | 1                                                       | -5.368222 | 2.542694  | -1.967806 |
| 6                                                       | -0.343462 | 3.037267  | 3.038172  | 6                                                       | -1.599785 | 1.696695  | -1.591391 |
| 6                                                       | 0.979966  | 3.374918  | 3.250362  | 7                                                       | -0.269961 | 1.391467  | -1.386494 |
| 6                                                       | 1.602051  | -1.696807 | -1.589258 | 6                                                       | -3.389306 | 2.998989  | -2.655720 |
| 6                                                       | 3.922920  | -1.297146 | -0.970410 | 6                                                       | -2.004824 | 2.709246  | -2.520622 |
| 6                                                       | 4.310241  | -2.306216 | -1.875876 | 6                                                       | 0.666632  | 2.042272  | -2.094211 |
| 6                                                       | 3.392989  | -2.998706 | -2.651642 | 1                                                       | -3.710184 | 3.767024  | -3.357637 |
| 6                                                       | 2.008259  | -2.709632 | -2.517674 | 6                                                       | -0.980234 | 3.374295  | -3.250911 |
| 6                                                       | 0.984529  | -3.375698 | -3.248243 | 1                                                       | 1.698454  | 1.765371  | -1.897233 |
| 1                                                       | 4.694679  | -0.820531 | -0.380936 | 6                                                       | 0.343220  | 3.036703  | -3.038763 |
| 1                                                       | 5.371151  | -2.541107 | -1.962469 | 1                                                       | -1.253212 | 4.147457  | -3.968665 |
| 1                                                       | 4.693786  | 0.822641  | 0.385281  | 1                                                       | 1.146590  | 3.529195  | -3.583354 |
| 1                                                       | 5.368045  | 2.543344  | 1.967642  | Fe(BQA) <sub>2</sub> (Olyp/def2tzvp, multiplicity = 1): |           |           |           |
| 1                                                       | 3.709872  | 3.767781  | 3.357206  | a.n.                                                    | X         | Y         | Z         |
| 1                                                       | -1.146884 | 3.529828  | 3.582624  | 7                                                       | 1.951745  | 0.000028  | -0.000147 |
| 1                                                       | 1.252873  | 4.148202  | 3.968012  | 6                                                       | 2.540282  | 0.968757  | 0.770265  |
| 1                                                       | -1.698575 | 1.765719  | 1.896743  | 6                                                       | 2.540191  | -0.968682 | -0.770656 |
| 1                                                       | 3.714784  | -3.766902 | -3.352964 | 6                                                       | 3.888551  | -1.360233 | -0.875443 |
| 6                                                       | -0.339262 | -3.038789 | -3.037101 | 6                                                       | 4.276887  | -2.389369 | -1.749163 |
| 7                                                       | 0.271929  | -1.392067 | -1.385570 | 6                                                       | 3.370883  | -3.063969 | -2.546749 |
| 6                                                       | -0.663850 | -2.043919 | -2.093427 | 6                                                       | 1.994886  | -2.741029 | -2.457292 |
| 1                                                       | -1.695947 | -1.767358 | -1.897389 | 6                                                       | 1.586787  | -1.713281 | -1.553764 |
| 1                                                       | 1.258412  | -4.149129 | -3.965361 | 7                                                       | 0.267324  | -1.382324 | -1.376919 |
| 1                                                       | -1.141998 | -3.532126 | -3.581862 | 6                                                       | -0.658648 | -2.015217 | -2.104424 |
| 26                                                      | 0.000039  | -0.000157 | -0.000014 | 6                                                       | -0.336072 | -3.017710 | -3.033428 |
| 1                                                       | -1.258258 | -4.148670 | 3.965915  | 6                                                       | 0.979894  | -3.388263 | -3.207520 |
| 1                                                       | 1.142142  | -3.531625 | 3.582406  | 6                                                       | 1.586941  | 1.713400  | 1.553412  |
| 6                                                       | -0.984384 | -3.375312 | 3.248714  | 6                                                       | 3.888654  | 1.360293  | 0.874952  |
| 6                                                       | 0.339403  | -3.038378 | 3.037569  | 6                                                       | 4.277042  | 2.389512  | 1.748555  |
| 1                                                       | -3.714634 | -3.766603 | 3.353408  | 6                                                       | 3.371088  | 3.064216  | 2.546108  |
| 6                                                       | -3.392850 | -2.998483 | 2.651999  | 6                                                       | 1.995081  | 2.741281  | 2.456764  |
|                                                         |           |           |           | 6                                                       | 0.980124  | 3.388667  | 3.206908  |

|    |           |           |           |                                                       |           |           |           |
|----|-----------|-----------|-----------|-------------------------------------------------------|-----------|-----------|-----------|
| 1  | 4.650671  | 0.902757  | 0.261110  | 1                                                     | -1.251267 | -4.173848 | 3.909668  |
| 1  | 5.331893  | 2.655532  | 1.793528  | 1                                                     | 1.137185  | -3.493072 | 3.594126  |
| 1  | 4.650599  | -0.902751 | -0.261598 | Cr(BQA) <sub>2</sub> (PBEPBE/def2tzvp, multiplicity = |           |           |           |
| 1  | 5.331733  | -2.655401 | -1.794214 | 3):                                                   |           |           |           |
| 1  | 3.695624  | -3.846003 | -3.228388 | a.n.                                                  | X         | Y         | Z         |
| 1  | -1.136710 | -3.493226 | -3.594174 | 7                                                     | 2.007345  | -0.000013 | -0.000073 |
| 1  | 1.251827  | -4.173724 | -3.909663 | 6                                                     | 2.603639  | -0.990009 | -0.752463 |
| 1  | -1.688238 | -1.721541 | -1.938836 | 6                                                     | 2.603734  | 0.989936  | 0.752302  |
| 1  | 3.695873  | 3.846340  | 3.227623  | 6                                                     | 3.952659  | 1.378790  | 0.814735  |
| 6  | -0.335857 | 3.018121  | 3.032901  | 6                                                     | 4.364727  | 2.425424  | 1.660985  |
| 7  | 0.267471  | 1.382383  | 1.376710  | 6                                                     | 3.476092  | 3.116859  | 2.463231  |
| 6  | -0.658476 | 2.015450  | 2.104107  | 6                                                     | 2.095786  | 2.797743  | 2.409501  |
| 1  | -1.688071 | 1.721720  | 1.938644  | 6                                                     | 1.667405  | 1.750422  | 1.540884  |
| 1  | 1.252091  | 4.174246  | 3.908905  | 7                                                     | 0.336047  | 1.424688  | 1.400084  |
| 1  | -1.136474 | 3.493768  | 3.593566  | 6                                                     | -0.576460 | 2.089377  | 2.127534  |
| 26 | 0.000002  | 0.000009  | -0.000013 | 6                                                     | -0.226313 | 3.111454  | 3.020761  |
| 1  | -1.252649 | 4.174174  | -3.908845 | 6                                                     | 1.100772  | 3.473347  | 3.162511  |
| 1  | 1.136002  | 3.493971  | -3.593569 | 6                                                     | 1.667223  | -1.750467 | -1.540970 |
| 6  | -0.980576 | 3.388603  | -3.206878 | 6                                                     | 3.952542  | -1.378928 | -0.814975 |
| 6  | 0.335452  | 3.018209  | -3.032907 | 6                                                     | 4.364505  | -2.425600 | -1.661229 |
| 1  | -3.696379 | 3.845957  | -3.227539 | 6                                                     | 3.475786  | -3.117010 | -2.463403 |
| 6  | -3.371491 | 3.063851  | -2.546052 | 6                                                     | 2.095499  | -2.797826 | -2.409592 |
| 6  | -1.995445 | 2.741075  | -2.456738 | 6                                                     | 1.100405  | -3.473399 | -3.162525 |
| 6  | 0.658204  | 2.015545  | -2.104150 | 1                                                     | 4.696941  | -0.902782 | -0.184289 |
| 6  | -4.277353 | 2.389015  | -1.748504 | 1                                                     | 5.423827  | -2.691035 | -1.678191 |
| 1  | 1.687835  | 1.721926  | -1.938715 | 1                                                     | 4.696994  | 0.902626  | 0.183987  |
| 6  | -1.587167 | 1.713216  | -1.553422 | 1                                                     | 5.424063  | 2.690809  | 1.677886  |
| 1  | -5.332238 | 2.654908  | -1.793456 | 1                                                     | 3.815065  | 3.916430  | 3.123945  |
| 7  | -0.267656 | 1.382347  | -1.376762 | 1                                                     | -1.013088 | 3.612723  | 3.585471  |
| 6  | -3.888829 | 1.359819  | -0.874936 | 1                                                     | 1.396842  | 4.276384  | 3.840391  |
| 6  | -2.540407 | 0.968445  | -0.770273 | 1                                                     | -1.615535 | 1.793833  | 1.979726  |
| 1  | -4.650489 | -0.903323 | 0.261621  | 1                                                     | 3.814679  | -3.916612 | -3.124121 |
| 7  | -1.951748 | -0.000238 | 0.000101  | 6                                                     | -0.226653 | -3.111439 | -3.020699 |
| 1  | -4.650783 | 0.902169  | -0.261101 | 7                                                     | 0.335889  | -1.424668 | -1.400090 |
| 6  | -3.888379 | -1.360700 | 0.875465  | 6                                                     | -0.576695 | -2.089327 | -2.127470 |
| 6  | -2.540066 | -0.968992 | 0.770651  | 1                                                     | -1.615747 | -1.793731 | -1.979604 |
| 6  | -4.276578 | -2.389867 | 1.749211  | 1                                                     | 1.396394  | -4.276464 | -3.840407 |
| 1  | -5.331391 | -2.656023 | 1.794285  | 1                                                     | -1.013488 | -3.612681 | -3.585349 |
| 6  | -1.586562 | -1.713456 | 1.553763  | 24                                                    | 0.000000  | 0.000023  | 0.000004  |
| 7  | -0.267142 | -1.382334 | 1.376898  | 1                                                     | -1.396540 | -4.276424 | 3.840405  |
| 6  | -3.370479 | -3.064348 | 2.546790  | 1                                                     | 1.013362  | -3.612710 | 3.585363  |
| 6  | -1.994522 | -2.741246 | 2.457305  | 6                                                     | -1.100525 | -3.473366 | 3.162526  |
| 6  | 0.658919  | -2.015120 | 2.104386  | 6                                                     | 0.226545  | -3.111445 | 3.020708  |
| 1  | -3.695115 | -3.846414 | 3.228443  | 1                                                     | -3.814811 | -3.916502 | 3.124105  |
| 6  | -0.979440 | -3.388357 | 3.207517  | 6                                                     | -3.475891 | -3.116909 | 2.463390  |
| 1  | 1.688470  | -1.721318 | 1.938787  | 6                                                     | -2.095594 | -2.797765 | 2.409587  |
| 6  | 0.336479  | -3.017651 | 3.033397  | 6                                                     | 0.576621  | -2.089342 | 2.127482  |

|   |           |           |           |    |           |           |           |
|---|-----------|-----------|-----------|----|-----------|-----------|-----------|
| 6 | -4.364586 | -2.425471 | 1.661212  | 1  | -5.431123 | 2.737278  | -1.569230 |
| 1 | 1.615683  | -1.793776 | 1.979622  | 1  | -4.680719 | -0.928101 | 0.112106  |
| 6 | -1.667284 | -1.750416 | 1.540969  | 1  | -5.431194 | -2.737188 | 1.569163  |
| 1 | -5.423915 | -2.690877 | 1.678168  | 1  | -3.847920 | -3.968325 | 3.043093  |
| 7 | -0.335940 | -1.424656 | 1.400098  | 1  | 0.976606  | -3.646587 | 3.609836  |
| 6 | -3.952587 | -1.378810 | 0.814963  | 1  | -1.436476 | -4.316794 | 3.808050  |
| 6 | -2.603673 | -0.989929 | 0.752459  | 1  | 1.601057  | -1.80909  | 2.021297  |
| 1 | -4.696967 | 0.902771  | -0.184002 | 1  | -3.847806 | 3.968397  | -3.043128 |
| 7 | -2.007346 | 0.000052  | 0.000077  | 6  | 0.201971  | 3.141183  | -3.032948 |
| 1 | -4.696969 | -0.902642 | 0.184274  | 7  | -0.348434 | 1.452203  | -1.423149 |
| 6 | -3.952615 | 1.378912  | -0.814746 | 6  | 0.562542  | 2.113395  | -2.155067 |
| 6 | -2.603701 | 0.990017  | -0.752305 | 1  | 1.601118  | 1.809056  | -2.021270 |
| 6 | -4.364646 | 2.425556  | -1.661000 | 1  | -1.436345 | 4.316828  | -3.808048 |
| 1 | -5.423974 | 2.690973  | -1.677907 | 1  | 0.976722  | 3.646576  | -3.609805 |
| 6 | -1.667345 | 1.750474  | -1.540883 | 24 | 0.000000  | -0.000004 | 0.000001  |
| 7 | -0.335997 | 1.424701  | -1.400075 | 1  | 1.436412  | 4.316808  | 3.808046  |
| 6 | -3.475986 | 3.116964  | -2.463241 | 1  | -0.976665 | 3.646588  | 3.609810  |
| 6 | -2.095690 | 2.797807  | -2.409503 | 6  | 1.131973  | 3.506467  | 3.142250  |
| 6 | 0.576534  | 2.089364  | -2.127519 | 6  | -0.201922 | 3.141184  | 3.032953  |
| 1 | -3.814932 | 3.916545  | -3.123958 | 1  | 3.847866  | 3.968344  | 3.043122  |
| 6 | -1.100652 | 3.473383  | -3.162507 | 6  | 3.498018  | 3.159751  | 2.399469  |
| 1 | 1.615599  | 1.793790  | -1.979705 | 6  | 2.120175  | 2.833264  | 2.378661  |
| 6 | 0.226422  | 3.111452  | -3.020748 | 6  | -0.562508 | 2.113399  | 2.155074  |
| 1 | -1.396694 | 4.276429  | -3.840388 | 6  | 4.373988  | 2.463293  | 1.58086   |
| 1 | 1.013215  | 3.612699  | -3.585452 | 1  | -1.601088 | 1.809072  | 2.021282  |
|   |           |           |           | 6  | 1.677130  | 1.772794  | 1.528593  |
|   |           |           |           | 1  | 5.431164  | 2.737202  | 1.569222  |
|   |           |           |           | 7  | 0.348457  | 1.452193  | 1.423155  |
|   |           |           |           | 6  | 3.950454  | 1.407034  | 0.757768  |
|   |           |           |           | 6  | 2.599831  | 1.005814  | 0.731706  |
|   |           |           |           | 1  | 4.680707  | -0.928163 | -0.112116 |
|   |           |           |           | 7  | 2.000587  | -0.000020 | 0.000018  |
|   |           |           |           | 1  | 4.680716  | 0.928100  | 0.11217   |
|   |           |           |           | 6  | 3.950448  | -1.407086 | -0.757725 |
|   |           |           |           | 6  | 2.599828  | -1.005854 | -0.731673 |
|   |           |           |           | 6  | 4.373980  | -2.463343 | -1.580821 |
|   |           |           |           | 1  | 5.431154  | -2.737261 | -1.569175 |
|   |           |           |           | 6  | 1.677127  | -1.772821 | -1.528573 |
|   |           |           |           | 7  | 0.348457  | -1.452210 | -1.423144 |
|   |           |           |           | 6  | 3.498012  | -3.159788 | -2.399442 |
|   |           |           |           | 6  | 2.120172  | -2.833289 | -2.378644 |
|   |           |           |           | 6  | -0.562508 | -2.113404 | -2.155076 |
|   |           |           |           | 1  | 3.847859  | -3.968379 | -3.043098 |
|   |           |           |           | 6  | 1.131970  | -3.506478 | -3.142247 |
|   |           |           |           | 1  | -1.601087 | -1.809070 | -2.02129  |
|   |           |           |           | 6  | -0.201922 | -3.141185 | -3.032958 |
|   |           |           |           | 1  | 1.436409  | -4.316818 | -3.808046 |

Cr(BQA)<sub>2</sub> (PBEPBE/def2tzvp, multiplicity = 5):

| a.n. | X         | Y         | Z         |   |           |           |           |
|------|-----------|-----------|-----------|---|-----------|-----------|-----------|
| 7    | -2.000587 | 0.000009  | -0.000018 | 6 | 3.950454  | 1.407034  | 0.757768  |
| 6    | -2.599815 | 1.005852  | -0.731708 | 6 | 2.599831  | 1.005814  | 0.731706  |
| 6    | -2.599843 | -1.005818 | 0.731670  | 1 | 4.680707  | -0.928163 | -0.112116 |
| 6    | -3.950468 | -1.407032 | 0.757718  | 7 | 2.000587  | -0.000020 | 0.000018  |
| 6    | -4.374017 | -2.463284 | 1.580813  | 1 | 4.680716  | 0.928100  | 0.11217   |
| 6    | -3.498060 | -3.159739 | 2.399437  | 6 | 3.950448  | -1.407086 | -0.757725 |
| 6    | -2.120216 | -2.833259 | 2.378643  | 6 | 2.599828  | -1.005854 | -0.731673 |
| 6    | -1.677155 | -1.772797 | 1.528572  | 6 | 4.373980  | -2.463343 | -1.580821 |
| 7    | -0.348480 | -1.452205 | 1.423146  | 1 | 5.431154  | -2.737261 | -1.569175 |
| 6    | 0.562474  | -2.113409 | 2.155081  | 6 | 1.677127  | -1.772821 | -1.528573 |
| 6    | 0.201872  | -3.141184 | 3.032965  | 7 | 0.348457  | -1.452210 | -1.423144 |
| 6    | -1.132026 | -3.50646  | 3.142250  | 6 | 3.498012  | -3.159788 | -2.399442 |
| 6    | -1.677102 | 1.772819  | -1.528592 | 6 | 2.120172  | -2.833289 | -2.378644 |
| 6    | -3.950433 | 1.407090  | -0.757773 | 6 | -0.562508 | -2.113404 | -2.155076 |
| 6    | -4.373951 | 2.463355  | -1.580866 | 1 | 3.847859  | -3.968379 | -3.043098 |
| 6    | -3.497970 | 3.159800  | -2.399473 | 6 | 1.131970  | -3.506478 | -3.142247 |
| 6    | -2.120132 | 2.833295  | -2.378662 | 1 | -1.601087 | -1.809070 | -2.02129  |
| 6    | -1.131918 | 3.506483  | -3.142250 | 6 | -0.201922 | -3.141185 | -3.032958 |
| 1    | -4.680702 | 0.928166  | -0.112176 | 1 | 1.436409  | -4.316818 | -3.808046 |

| [Cr(BQA) <sub>2</sub> ] <sup>+</sup> (PBEPBE/def2tzvp, multiplicity = 2): |           |           |           | [Cr(BQA) <sub>2</sub> ] <sup>+</sup> (PBEPBE/def2tzvp, multiplicity = 4): |           |           |           |
|---------------------------------------------------------------------------|-----------|-----------|-----------|---------------------------------------------------------------------------|-----------|-----------|-----------|
| a.n.                                                                      | X         | Y         | Z         | a.n.                                                                      | X         | Y         | Z         |
| 1                                                                         | -0.976664 | -3.646579 | -3.609826 | 1                                                                         | 1.572893  | -1.787159 | 2.074659  |
|                                                                           |           |           |           | 6                                                                         | -1.666618 | -1.846627 | 1.417125  |
|                                                                           |           |           |           | 1                                                                         | -5.382118 | -2.921638 | 1.210938  |
|                                                                           |           |           |           | 7                                                                         | -0.348843 | -1.453901 | 1.378306  |
| 7                                                                         | 1.955333  | 0.000189  | -0.000001 | 6                                                                         | -3.903728 | -1.498888 | 0.547423  |
| 6                                                                         | 2.574804  | -1.072026 | -0.626413 | 6                                                                         | -2.574598 | -1.072522 | 0.626413  |
| 6                                                                         | 2.574595  | 1.072522  | 0.626416  | 1                                                                         | -4.611114 | 0.994932  | 0.108190  |
| 6                                                                         | 3.903726  | 1.498883  | 0.547430  | 7                                                                         | -1.955336 | -0.000188 | -0.000002 |
| 6                                                                         | 4.337503  | 2.616633  | 1.289912  | 1                                                                         | -4.610924 | -0.995815 | -0.108187 |
| 6                                                                         | 3.478420  | 3.326541  | 2.107473  | 6                                                                         | -3.904015 | 1.498142  | -0.547420 |
| 6                                                                         | 2.108757  | 2.961179  | 2.181029  | 6                                                                         | -2.574804 | 1.072029  | -0.626414 |
| 6                                                                         | 1.666615  | 1.846627  | 1.417127  | 6                                                                         | -4.338006 | 2.615810  | -1.289900 |
| 7                                                                         | 0.348839  | 1.453901  | 1.378307  | 1                                                                         | -5.382678 | 2.920610  | -1.210931 |
| 6                                                                         | -0.538439 | 2.127859  | 2.125382  | 6                                                                         | -1.666974 | 1.846308  | -1.417128 |
| 6                                                                         | -0.174902 | 3.222211  | 2.926533  | 7                                                                         | -0.349123 | 1.453834  | -1.378313 |
| 6                                                                         | 1.139898  | 3.647669  | 2.955598  | 6                                                                         | -3.479061 | 3.325880  | -2.107465 |
| 6                                                                         | 1.666975  | -1.846308 | -1.417125 | 6                                                                         | -2.109330 | 2.960777  | -2.181027 |
| 6                                                                         | 3.904017  | -1.498131 | -0.547422 | 6                                                                         | 0.538025  | 2.127962  | -2.125390 |
| 6                                                                         | 4.338011  | -2.615799 | -1.289901 | 1                                                                         | -3.835088 | 4.180480  | -2.684633 |
| 6                                                                         | 3.479067  | -3.325874 | -2.107462 | 6                                                                         | -1.140604 | 3.647453  | -2.955599 |
| 6                                                                         | 2.109334  | -2.960776 | -2.181024 | 1                                                                         | 1.572547  | 1.787457  | -2.074672 |
| 6                                                                         | 1.140609  | -3.647456 | -2.955593 | 6                                                                         | 0.174277  | 3.222245  | -2.926539 |
| 1                                                                         | 4.611115  | -0.994915 | 0.108184  | 1                                                                         | -1.441874 | 4.504274  | -3.560695 |
| 1                                                                         | 5.382685  | -2.920593 | -1.210935 | 1                                                                         | 0.943899  | 3.726279  | -3.511084 |
| 1                                                                         | 4.610924  | 0.995805  | -0.108176 |                                                                           |           |           |           |
| 1                                                                         | 5.382118  | 2.921629  | 1.210949  |                                                                           |           |           |           |
| 1                                                                         | 3.834283  | 4.181207  | 2.684644  |                                                                           |           |           |           |
| 1                                                                         | -0.944622 | 3.726098  | 3.511077  | 7                                                                         | 1.997990  | 0.000016  | 0.000091  |
| 1                                                                         | 1.441003  | 4.504547  | 3.560697  | 6                                                                         | 2.601156  | -0.99610  | -0.746049 |
| 1                                                                         | -1.572896 | 1.787159  | 2.074660  | 6                                                                         | 2.601035  | 0.996178  | 0.746266  |
| 1                                                                         | 3.835096  | -4.180474 | -2.684631 | 6                                                                         | 3.944828  | 1.390911  | 0.791463  |
| 6                                                                         | -0.174272 | -3.222251 | -2.926533 | 6                                                                         | 4.369418  | 2.440558  | 1.632546  |
| 7                                                                         | 0.349124  | -1.453836 | -1.378311 | 6                                                                         | 3.493912  | 3.130091  | 2.447346  |
| 6                                                                         | -0.538023 | -2.127967 | -2.125387 | 6                                                                         | 2.11509   | 2.805798  | 2.408795  |
| 1                                                                         | -1.572545 | -1.787464 | -2.074669 | 6                                                                         | 1.676718  | 1.757538  | 1.545085  |
| 1                                                                         | 1.441882  | -4.504277 | -3.560689 | 7                                                                         | 0.346633  | 1.441925  | 1.426506  |
| 1                                                                         | -0.943893 | -3.726287 | -3.511078 | 6                                                                         | -0.559651 | 2.098200  | 2.154669  |
| 24                                                                        | -0.000001 | 0.000000  | -0.000003 | 6                                                                         | -0.202354 | 3.119498  | 3.050533  |
| 1                                                                         | -1.441006 | -4.504548 | 3.560694  | 6                                                                         | 1.126484  | 3.475067  | 3.171188  |
| 1                                                                         | 0.944618  | -3.726098 | 3.511075  | 6                                                                         | 1.676948  | -1.757507 | -1.544495 |
| 6                                                                         | -1.139901 | -3.647670 | 2.955596  | 6                                                                         | 3.944975  | -1.390753 | -0.791143 |
| 6                                                                         | 0.174898  | -3.222212 | 2.926531  | 6                                                                         | 4.369695  | -2.440367 | -1.632202 |
| 1                                                                         | -3.834284 | -4.181212 | 2.684637  | 6                                                                         | 3.494293  | -3.129947 | -2.447076 |
| 6                                                                         | -3.478421 | -3.326544 | 2.107468  | 6                                                                         | 2.115450  | -2.805737 | -2.40863  |
| 6                                                                         | -2.108759 | -2.961180 | 2.181026  | 6                                                                         | 1.126941  | -3.475064 | -3.1711   |
| 6                                                                         | 0.538436  | -2.127860 | 2.125381  | 1                                                                         | 4.685001  | -0.91646  | -0.15361  |
| 6                                                                         | -4.337504 | -2.616638 | 1.289904  | 1                                                                         | 5.428448  | -2.705121 | -1.632471 |



|    |           |           |           |                                                       |           |           |           |
|----|-----------|-----------|-----------|-------------------------------------------------------|-----------|-----------|-----------|
| 1  | 4.684932  | 0.916654  | 0.153995  |                                                       |           |           |           |
| 1  | 5.428155  | 2.705375  | 1.632896  |                                                       |           |           |           |
| 1  | 3.840761  | 3.928734  | 3.10394   | Mn(BQA) <sub>2</sub> (PBEPBE/def2tzvp, multiplicity = |           |           |           |
| 1  | -0.979638 | 3.621002  | 3.626479  | 2):                                                   |           |           |           |
| 1  | 1.429739  | 4.276812  | 3.847808  | a.n.                                                  | X         | Y         | Z         |
| 1  | -1.600316 | 1.803856  | 2.012931  | 7                                                     | 1.965265  | 0.000000  | 0.000040  |
| 1  | 3.841242  | -3.928566 | -3.103647 | 6                                                     | 2.562241  | 0.971981  | 0.772001  |
| 6  | -0.201928 | -3.119576 | -3.050545 | 6                                                     | 2.562286  | -0.971964 | -0.771908 |
| 7  | 0.346835  | -1.44197  | -1.426476 | 6                                                     | 3.91165   | -1.356810 | -0.861968 |
| 6  | -0.559355 | -2.0983   | -2.154709 | 6                                                     | 4.306195  | -2.387369 | -1.734984 |
| 1  | -1.600047 | -1.804016 | -2.013052 | 6                                                     | 3.404368  | -3.056488 | -2.544015 |
| 1  | 1.430297  | -4.276788 | -3.847699 | 6                                                     | 2.026785  | -2.731609 | -2.470051 |
| 1  | -0.979137 | -3.621128 | -3.62655  | 6                                                     | 1.615304  | -1.714550 | -1.559799 |
| 24 | 0.000001  | -0.00003  | -0.000007 | 6                                                     | 0.292449  | -1.378850 | -1.390152 |
| 1  | -1.430187 | -4.276802 | 3.847714  | 6                                                     | -0.633414 | -1.989889 | -2.145445 |
| 1  | 0.979231  | -3.621085 | 3.626558  | 6                                                     | -0.300435 | -2.975631 | -3.087624 |
| 6  | -1.126852 | -3.475074 | 3.17111   | 6                                                     | 1.017296  | -3.359648 | -3.245600 |
| 6  | 0.202009  | -3.119555 | 3.05055   | 6                                                     | 1.615217  | 1.714558  | 1.559850  |
| 1  | -3.841142 | -3.928641 | 3.103663  | 6                                                     | 3.911596  | 1.356850  | 0.862109  |
| 6  | -3.494213 | -3.130018 | 2.447086  | 6                                                     | 4.306090  | 2.387424  | 1.735129  |
| 6  | -2.115377 | -2.805776 | 2.408637  | 6                                                     | 3.404222  | 3.056536  | 2.544121  |
| 6  | 0.559410  | -2.098276 | 2.154707  | 6                                                     | 2.026646  | 2.731633  | 2.470109  |
| 6  | -4.369632 | -2.440463 | 1.63221   | 6                                                     | 1.017118  | 3.359662  | 3.245614  |
| 1  | 1.600096  | -1.803967 | 2.013047  | 1                                                     | 4.667912  | 0.889900  | 0.238903  |
| 6  | -1.676901 | -1.757541 | 1.54495   | 1                                                     | 5.364109  | 2.655620  | 1.773784  |
| 1  | -5.428379 | -2.705242 | 1.632483  | 1                                                     | 4.667935  | -0.889855 | -0.238728 |
| 7  | -0.346796 | -1.441972 | 1.426472  | 1                                                     | 5.364219  | -2.655548 | -1.773601 |
| 6  | -3.944939 | -1.390845 | 0.791144  | 1                                                     | 3.733885  | -3.839191 | -3.229216 |
| 6  | -2.601129 | -0.996161 | 0.746046  | 1                                                     | -1.097393 | -3.436046 | -3.672611 |
| 1  | -4.684956 | 0.916529  | -0.154003 | 1                                                     | 1.295922  | -4.139472 | -3.957173 |
| 7  | -1.997988 | -0.000036 | -0.000102 | 1                                                     | -1.666986 | -1.688368 | -1.977465 |
| 1  | -4.684976 | -0.916572 | 0.153609  | 1                                                     | 3.733700  | 3.839251  | 3.229327  |
| 6  | -3.944864 | 1.390811  | -0.791466 | 6                                                     | -0.300601 | 2.975622  | 3.087594  |
| 6  | -2.601061 | 0.996114  | -0.746271 | 7                                                     | 0.292373  | 1.378835  | 1.390157  |
| 6  | -4.369482 | 2.440450  | -1.632544 | 6                                                     | -0.633528 | 1.989864  | 2.145411  |
| 1  | -5.428226 | 2.705238  | -1.632893 | 1                                                     | -1.667089 | 1.688324  | 1.977396  |
| 6  | -1.676764 | 1.757502  | -1.545088 | 1                                                     | 1.295705  | 4.139498  | 3.957191  |
| 7  | -0.34667  | 1.441922  | -1.426511 | 1                                                     | -1.097588 | 3.436028  | 3.672547  |
| 6  | -3.493994 | 3.130012  | -2.447341 | 25                                                    | -0.000001 | -0.000012 | -0.000002 |
| 6  | -2.115164 | 2.805754  | -2.408792 | 1                                                     | -1.295740 | 4.139497  | -3.957183 |
| 6  | 0.559597  | 2.098225  | -2.154672 | 1                                                     | 1.097558  | 3.436044  | -3.672543 |
| 1  | -3.840865 | 3.928649  | -3.103930 | 6                                                     | -1.017148 | 3.359661  | -3.245608 |
| 6  | -1.126575 | 3.475053  | -3.171182 | 6                                                     | 0.300574  | 2.97563   | -3.087591 |
| 1  | 1.600269  | 1.803907  | -2.012936 | 1                                                     | -3.733731 | 3.839232  | -3.229316 |
| 6  | 0.202272  | 3.119518  | -3.050529 | 6                                                     | -3.404247 | 3.056517  | -2.544113 |
| 1  | -1.429852 | 4.276794  | -3.847797 | 6                                                     | -2.026670 | 2.731623  | -2.470104 |
| 1  | 0.979543  | 3.621046  | -3.626474 | 6                                                     | 0.633509  | 1.989872  | -2.145411 |
|    |           |           |           | 6                                                     | -4.306110 | 2.387397  | -1.735123 |
|    |           |           |           | 1                                                     | 1.667073  | 1.688339  | -1.977399 |

|                                                       |           |           |           |    |           |           |           |
|-------------------------------------------------------|-----------|-----------|-----------|----|-----------|-----------|-----------|
| 6                                                     | -1.615232 | 1.714549  | -1.559849 | 1  | 5.353886  | -2.710841 | -1.664112 |
| 1                                                     | -5.364130 | 2.655586  | -1.773775 | 1  | 3.741605  | -3.914753 | -3.123792 |
| 7                                                     | -0.292386 | 1.378834  | -1.390158 | 1  | -1.102212 | -3.560158 | -3.580697 |
| 6                                                     | -3.911607 | 1.356824  | -0.862105 | 1  | 1.299837  | -4.250358 | -3.850953 |
| 6                                                     | -2.562250 | 0.971963  | -0.772001 | 1  | -1.679765 | -1.749611 | -1.957328 |
| 1                                                     | -4.667928 | -0.889898 | 0.238726  | 1  | 3.740904  | 3.915005  | 3.124209  |
| 7                                                     | -1.965266 | -0.000017 | -0.000043 | 6  | -0.308899 | 3.071002  | 3.015644  |
| 1                                                     | -4.667920 | 0.889868  | -0.238900 | 7  | 0.284038  | 1.409236  | 1.389493  |
| 6                                                     | -3.911639 | -1.356845 | 0.861966  | 6  | -0.646190 | 2.054843  | 2.114754  |
| 6                                                     | -2.562278 | -0.971986 | 0.771906  | 1  | -1.680148 | 1.749402  | 1.957132  |
| 6                                                     | -4.306174 | -2.387407 | 1.734983  | 1  | 1.299024  | 4.250424  | 3.851071  |
| 1                                                     | -5.364196 | -2.655596 | 1.773600  | 1  | -1.102936 | 3.560017  | 3.580544  |
| 6                                                     | -1.615289 | -1.714564 | 1.559797  | 25 | -0.000002 | -0.000039 | -0.000003 |
| 7                                                     | -0.292437 | -1.378852 | 1.390149  | 1  | -1.299178 | 4.250401  | -3.851048 |
| 6                                                     | -3.404341 | -3.056518 | 2.544014  | 1  | 1.102806  | 3.560074  | -3.580528 |
| 6                                                     | -2.026760 | -2.731627 | 2.470050  | 6  | -1.017625 | 3.448407  | -3.166013 |
| 6                                                     | 0.633432  | -1.989884 | 2.145441  | 6  | 0.308786  | 3.071026  | -3.015632 |
| 1                                                     | -3.733850 | -3.839224 | 3.229215  | 1  | -3.741045 | 3.914895  | -3.124188 |
| 6                                                     | -1.017266 | -3.359657 | 3.245597  | 6  | -3.403402 | 3.116031  | -2.462002 |
| 1                                                     | 1.667002  | -1.688354 | 1.977460  | 6  | -2.023888 | 2.790496  | -2.413746 |
| 6                                                     | 0.300463  | -2.97563  | 3.087621  | 6  | 0.646111  | 2.054869  | -2.114753 |
| 1                                                     | -1.295884 | -4.139484 | 3.957171  | 6  | -4.297069 | 2.435162  | -1.650128 |
| 1                                                     | 1.097425  | -3.436038 | 3.672607  | 1  | 1.680079  | 1.749460  | -1.957137 |
| Mn(BQA) <sub>2</sub> (PBEPBE/def2tzvp, multiplicity = |           |           |           | 6  | -1.606405 | 1.743802  | -1.539771 |
| 4):                                                   |           |           |           | 1  | -5.353561 | 2.711020  | -1.664736 |
| a.n.                                                  | X         | Y         | Z         | 7  | -0.284095 | 1.409224  | -1.389498 |
| 7                                                     | 1.943118  | 0.000018  | 0.000143  | 6  | -3.892119 | 1.391173  | -0.800386 |
| 6                                                     | 2.542736  | 0.995730  | 0.751596  | 6  | -2.542777 | 0.995643  | -0.751593 |
| 6                                                     | 2.542910  | -0.995622 | -0.751266 | 1  | -4.633936 | -0.922226 | 0.160356  |
| 6                                                     | 3.892277  | -1.391086 | -0.799903 | 7  | -1.943123 | -0.000051 | -0.000144 |
| 6                                                     | 4.297380  | -2.435033 | -1.649625 | 1  | -4.633906 | 0.922163  | -0.160927 |
| 6                                                     | 3.403843  | -3.115923 | -2.461625 | 6  | -3.892229 | -1.391226 | 0.799916  |
| 6                                                     | 2.024307  | -2.790457 | -2.413527 | 6  | -2.542876 | -0.995712 | 0.751270  |
| 6                                                     | 1.606669  | -1.743804 | -1.539576 | 6  | -4.297289 | -2.435189 | 1.649638  |
| 7                                                     | 0.284326  | -1.409293 | -1.389452 | 1  | -5.353786 | -2.711034 | 1.664131  |
| 6                                                     | -0.645764 | -2.054967 | -2.114832 | 6  | -1.606605 | -1.743863 | 1.539574  |
| 6                                                     | -0.308283 | -3.071085 | -3.015696 | 7  | -0.284273 | -1.409304 | 1.389445  |
| 6                                                     | 1.018165  | -3.448396 | -3.165931 | 6  | -3.403724 | -3.116050 | 2.461629  |
| 6                                                     | 1.606337  | 1.743855  | 1.539773  | 6  | -2.024199 | -2.790536 | 2.413521  |
| 6                                                     | 3.892065  | 1.391302  | 0.800393  | 6  | 0.645844  | -2.054956 | 2.114808  |
| 6                                                     | 4.296979  | 2.435300  | 1.650141  | 1  | -3.741452 | -3.914896 | 3.123793  |
| 6                                                     | 3.403288  | 3.116136  | 2.462017  | 6  | -1.018029 | -3.448449 | 3.165911  |
| 6                                                     | 2.023784  | 2.790556  | 2.413756  | 1  | 1.679834  | -1.749563 | 1.957300  |
| 6                                                     | 1.017499  | 3.448427  | 3.166029  | 6  | 0.308405  | -3.071094 | 3.015665  |
| 1                                                     | 4.633868  | 0.922315  | 0.160934  | 1  | -1.299670 | -4.250426 | 3.850929  |
| 1                                                     | 5.353462  | 2.711192  | 1.664753  | 1  | 1.102356  | -3.560148 | 3.580653  |
| 1                                                     | 4.633963  | -0.922058 | -0.160338 |    |           |           |           |

| Mn(BQA) <sub>2</sub> (PBEPBE/def2tzvp, multiplicity = 6): |           |           |           |    |           |           |           |
|-----------------------------------------------------------|-----------|-----------|-----------|----|-----------|-----------|-----------|
| a.n.                                                      | X         | Y         | Z         |    |           |           |           |
|                                                           |           |           |           | 1  | -0.473897 | -3.907208 | -3.674499 |
|                                                           |           |           |           | 25 | 0.000002  | 0.000667  | 0.000203  |
| 7                                                         | 2.175426  | -0.001795 | -0.001064 | 1  | -1.943709 | -4.589821 | 3.545606  |
| 6                                                         | 2.793718  | -1.058798 | -0.609796 | 1  | 0.466683  | -3.907246 | 3.675837  |
| 6                                                         | 2.796756  | 1.053837  | 0.606947  | 6  | -1.570664 | -3.731830 | 2.980700  |
| 6                                                         | 4.128767  | 1.485720  | 0.460135  | 6  | -0.243163 | -3.362458 | 3.052389  |
| 6                                                         | 4.625145  | 2.610935  | 1.142713  | 1  | -4.238617 | -4.213182 | 2.550758  |
| 6                                                         | 3.839572  | 3.356221  | 2.003085  | 6  | -3.835511 | -3.357569 | 2.006422  |
| 6                                                         | 2.475413  | 3.008117  | 2.157335  | 6  | -2.471502 | -3.008415 | 2.159645  |
| 6                                                         | 1.946486  | 1.882408  | 1.446119  | 6  | 0.196295  | -2.268883 | 2.282226  |
| 7                                                         | 0.624907  | 1.559733  | 1.512128  | 6  | -4.622286 | -2.612937 | 1.146589  |
| 6                                                         | -0.192857 | 2.270626  | 2.281939  | 1  | 1.246793  | -1.965049 | 2.280068  |
| 6                                                         | 0.248002  | 3.363914  | 3.051705  | 6  | -1.943956 | -1.882347 | 1.447977  |
| 6                                                         | 1.575731  | 3.732269  | 2.979008  | 1  | -5.666168 | -2.895698 | 0.991200  |
| 6                                                         | 1.940635  | -1.885535 | -1.447922 | 7  | -0.622579 | -1.558657 | 1.512987  |
| 6                                                         | 4.124957  | -1.493574 | -0.464575 | 6  | -4.127267 | -1.487379 | 0.463583  |
| 6                                                         | 4.618078  | -2.619859 | -1.147755 | 6  | -2.795484 | -1.054472 | 0.609393  |
| 6                                                         | 3.829862  | -3.363423 | -2.007193 | 1  | -4.790866 | 0.968656  | 0.223273  |
| 6                                                         | 2.466271  | -3.012370 | -2.159788 | 7  | -2.175421 | 0.001611  | 0.000862  |
| 6                                                         | 1.564033  | -3.734572 | -2.980374 | 1  | -4.791534 | -0.963788 | -0.220695 |
| 1                                                         | 4.790277  | -0.970889 | 0.219373  | 6  | -4.126456 | 1.491899  | -0.461131 |
| 1                                                         | 5.661633  | -2.904078 | -0.992836 | 6  | -2.794983 | 1.058159  | -0.607354 |
| 1                                                         | 4.792126  | 0.961588  | -0.224607 | 6  | -4.620943 | 2.617842  | -1.143879 |
| 1                                                         | 5.669127  | 2.892892  | 0.986539  | 1  | -5.664603 | 2.901247  | -0.988176 |
| 1                                                         | 4.243734  | 4.211558  | 2.547072  | 6  | -1.943162 | 1.885598  | -1.446067 |
| 1                                                         | -0.460969 | 3.909280  | 3.675644  | 7  | -0.621995 | 1.561113  | -1.511441 |
| 1                                                         | 1.949848  | 4.590011  | 3.543584  | 6  | -3.833932 | 3.362073  | -2.003849 |
| 1                                                         | -1.243582 | 1.967571  | 2.280615  | 6  | -2.470186 | 3.012079  | -2.157473 |
| 1                                                         | 4.231516  | -4.219623 | -2.551680 | 6  | 0.197128  | 2.270920  | -2.280811 |
| 6                                                         | 0.237008  | -3.363371 | -3.051426 | 1  | -4.236645 | 4.217999  | -2.547982 |
| 7                                                         | 0.619673  | -1.560032 | -1.512291 | 6  | -1.569106 | 3.735029  | -2.978674 |
| 6                                                         | -0.200563 | -2.269162 | -2.281092 | 1  | 1.247435  | 1.966423  | -2.278974 |
| 1                                                         | -1.250640 | -1.963885 | -2.278415 | 6  | -0.241850 | 3.364849  | -3.050739 |
| 1                                                         | 1.935617  | -4.593099 | -3.545427 | 1  | -1.941767 | 4.593311  | -3.543390 |
|                                                           |           |           |           | 1  | 0.468178  | 3.909272  | -3.674300 |

**Table S2** Absolute energies (a.u.) computed with method/Def2TZVP.

| Molecule                             | Multiplicity | Method | Absolute energy  |
|--------------------------------------|--------------|--------|------------------|
| Zn(BQA) <sub>2</sub>                 | 1            | PBEPBE | -3492.5578851    |
| Cr(BQA) <sub>2</sub>                 | 1            | PBEPBE | Did not converge |
| Cr(BQA) <sub>2</sub>                 | 3            | PBEPBE | -2757.7576040    |
| Cr(BQA) <sub>2</sub>                 | 5            | PBEPBE | -2757.7346991    |
| [Cr(BQA) <sub>2</sub> ] <sup>+</sup> | 2            | PBEPBE | -2757.5661227    |
| [Cr(BQA) <sub>2</sub> ] <sup>+</sup> | 4            | PBEPBE | -2757.5883125    |
| Mn(BQA) <sub>2</sub>                 | 2            | PBEPBE | -2864.2641805    |
| Mn(BQA) <sub>2</sub>                 | 4            | PBEPBE | -2864.2397968    |
| Mn(BQA) <sub>2</sub>                 | 6            | PBEPBE | -2864.2369049    |
| Fe(BQA) <sub>2</sub>                 | 1            | PBEPBE | -2976.9923581    |
| Fe(BQA) <sub>2</sub>                 | 3            | PBEPBE | -2976.9532000    |
| Fe(BQA) <sub>2</sub>                 | 5            | PBEPBE | -2976.9038425    |
| Fe(BQA) <sub>2</sub>                 | 1            | BLYP   | -2978.7464030    |
| Fe(BQA) <sub>2</sub>                 | 1            | OLYP   | -2978.9492766    |

**Table S3** Average metal to nitrogen bond length in the complexes as determined by XRD and computed at PBEPBE/Def2TZVP.

| Molecule                          | Av. Len. M – N <sub>amide</sub> / Å |       | Av. Len. M – N <sub>quinoliny</sub> / Å |       |
|-----------------------------------|-------------------------------------|-------|-----------------------------------------|-------|
|                                   | XRD                                 | Calc. | XRD                                     | Calc. |
| Zn(BQA) <sub>2</sub>              | 2.07                                | 2.10  | 2.18                                    | 2.22  |
| Cr(BQA) <sub>2</sub> <sup>a</sup> | 1.98                                | 2.01  | 2.04                                    | 2.03  |
| Mn(BQA) <sub>2</sub> <sup>b</sup> | 2.17                                | 2.18  | 2.24                                    | 2.26  |
| Fe(BQA) <sub>2</sub>              | 1.93                                | 1.95  | 1.94                                    | 1.95  |

<sup>a</sup> Multiplicity for the calculation was set to 3  
<sup>b</sup> Multiplicity for the calculation was set to 6

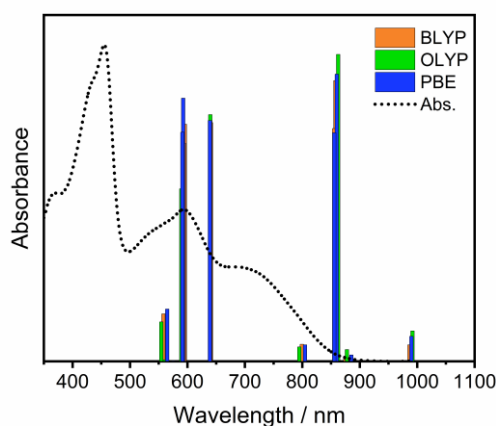**Fig. S1** Calculated absorbance for Fe(BQA)<sub>2</sub> in vacuo by different functionals and a Def2TZVP basis set compared to the experimental spectrum in solution.

## Supplementary Measurement Data

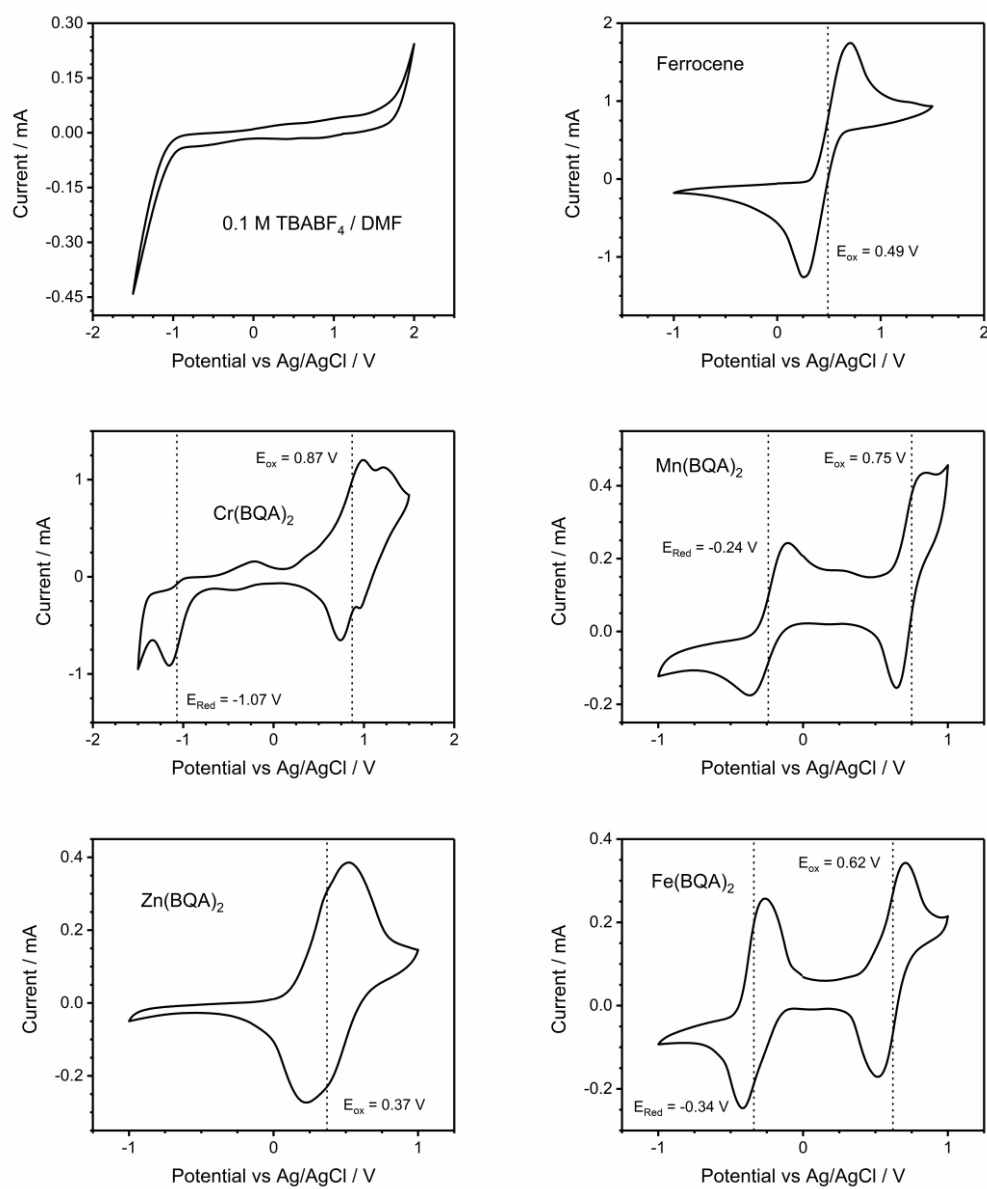

**Fig. S2** Cyclic voltammograms of all complexes in this study, the DMF/TBABF<sub>4</sub> electrolyte background and the external ferrocene reference.

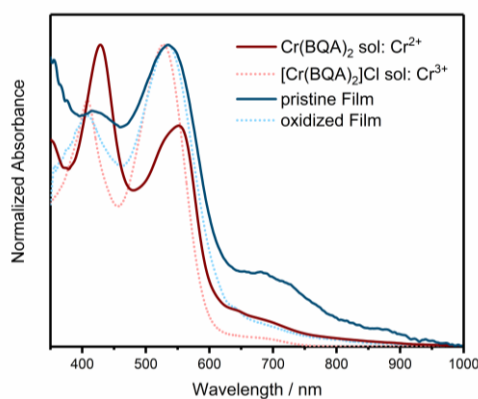

**Fig. S3** Investigation on the oxidation state of the Cr(BQA)<sub>2</sub> powder. [Cr(BQA)<sub>2</sub>]Cl was explicitly synthesized to compare to Cr(BQA)<sub>2</sub>. The absorbance of a 20 nm thick film of Cr(BQA)<sub>2</sub> is also given. The film was then left at air for a week, leading to (partial) oxidation seen in a significant decrease of the absorbance above 600 nm.

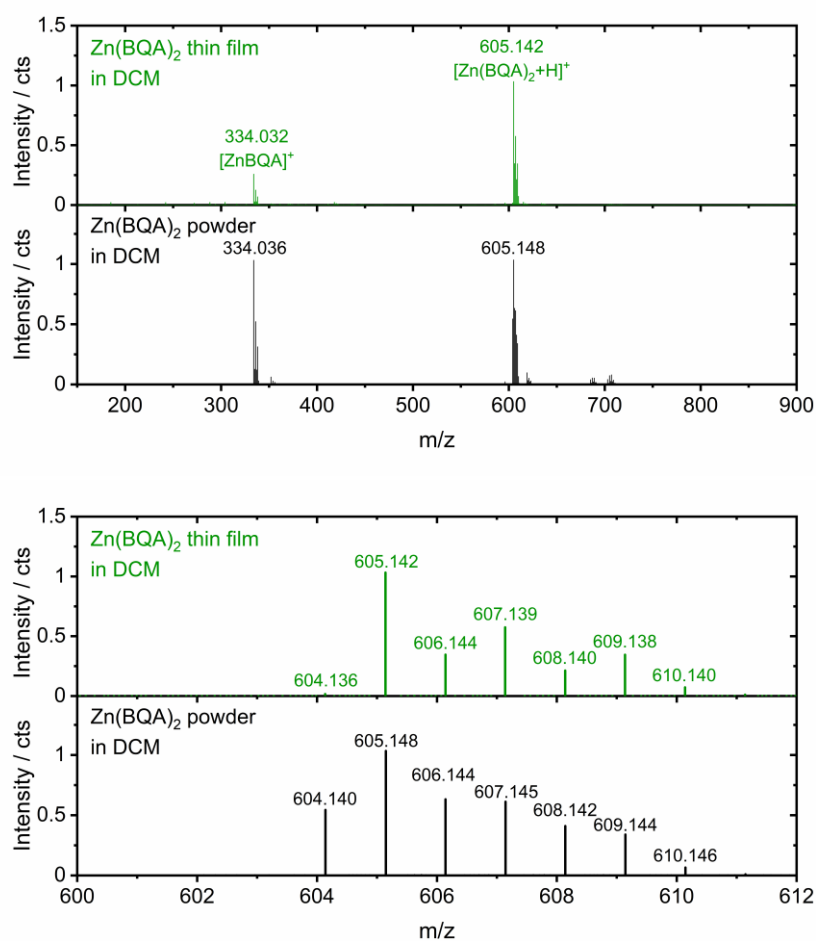

**Fig. S4** Electrospray ionization mass spectra following dissolution of a vapour-deposited Zn(BQA)<sub>2</sub> thin film in DCM and the respective source material as powder. The bottom graph shows a limited m/z range. The evaporation source was filled at air.

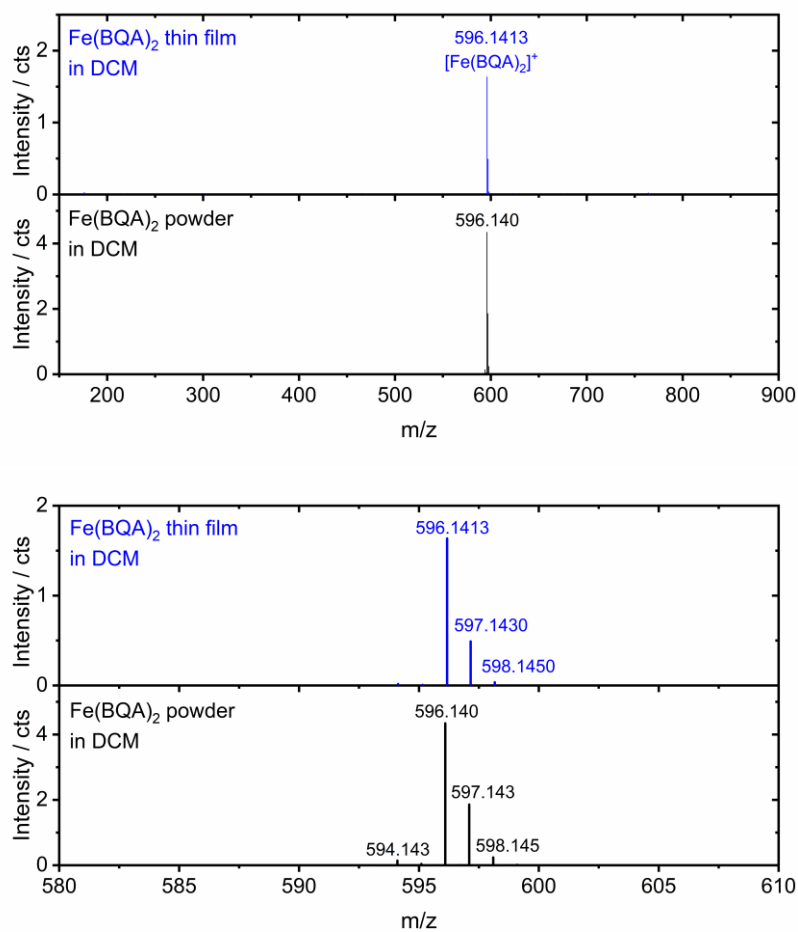

**Fig. S5** Electrospray ionization mass spectra from solutions in DCM of a vapour-deposited Fe(BQA)<sub>2</sub> thin film and the respective source material as powder. The bottom graph shows a limited m/z range. The evaporation source was filled at air.

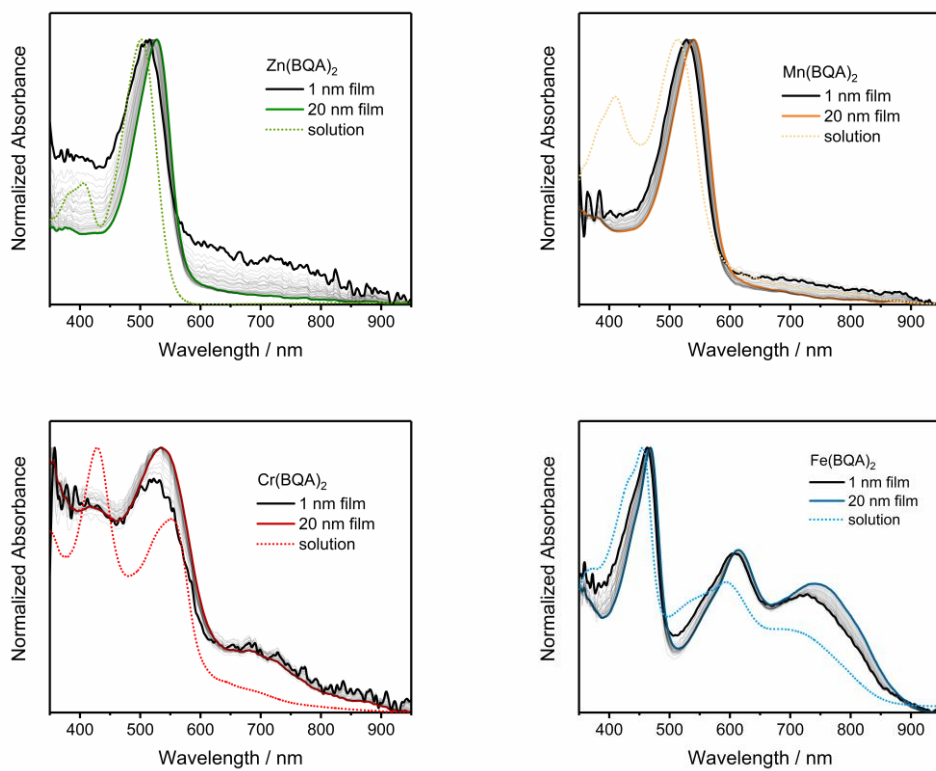

**Fig. S6** Optical absorbance of thin films dependent on film thickness. The absorbance of the source material in DMF solution is also shown.



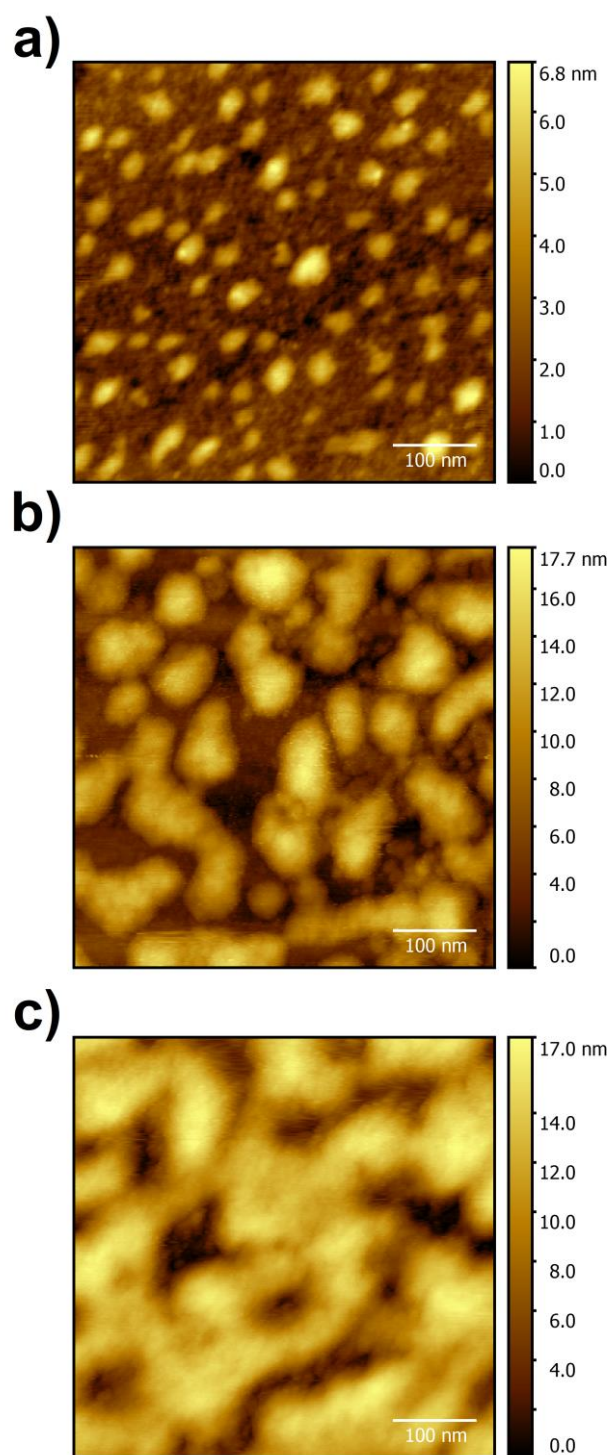

**Fig. S7** AFM images of a) 1 nm b) 5 nm and c) 12 nm  $\text{Fe}(\text{BQA})_2$  vapor-deposited on quartz glass.

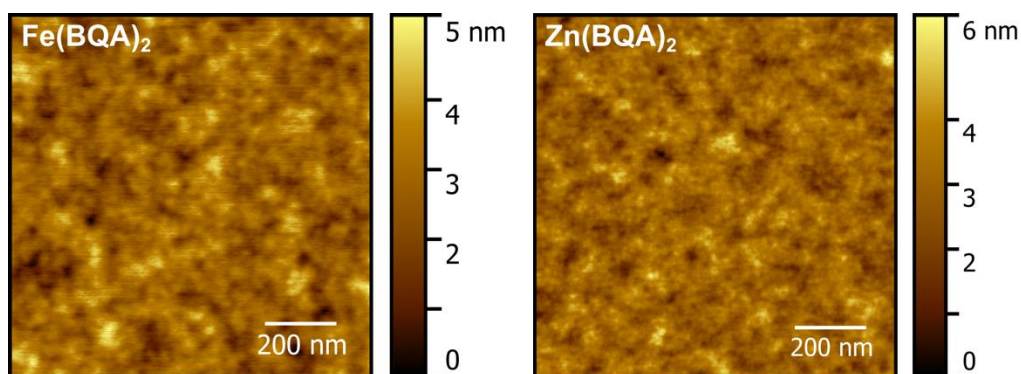

**Fig. S8** AFM images of  $\text{Fe}(\text{BQA})_2$  and  $\text{Zn}(\text{BQA})_2$  deposited on  $\text{SiO}_2$  coated silicon wafers. The film thickness of  $\text{Zn}(\text{BQA})_2$  was 72 nm and its evaporation source was filled at air.

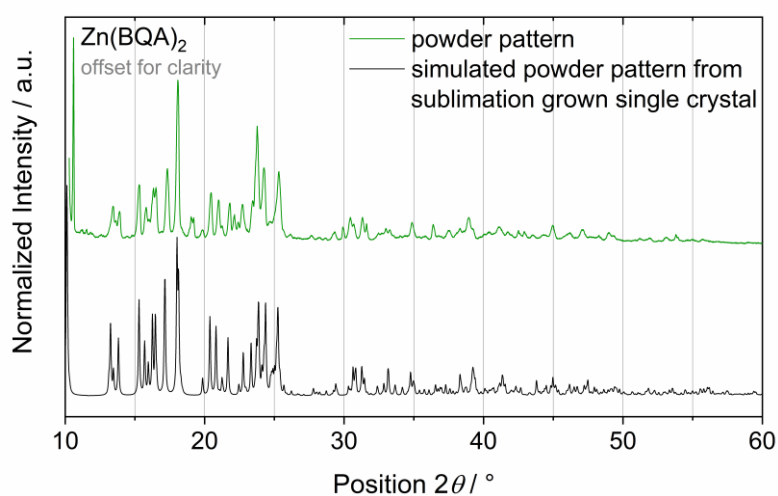

**Fig. S9** Powder XRD pattern of  $\text{Zn}(\text{BQA})_2$  source material. A reference pattern simulated from the single crystal XRD data is shown to prove the identity of the solid state structures.

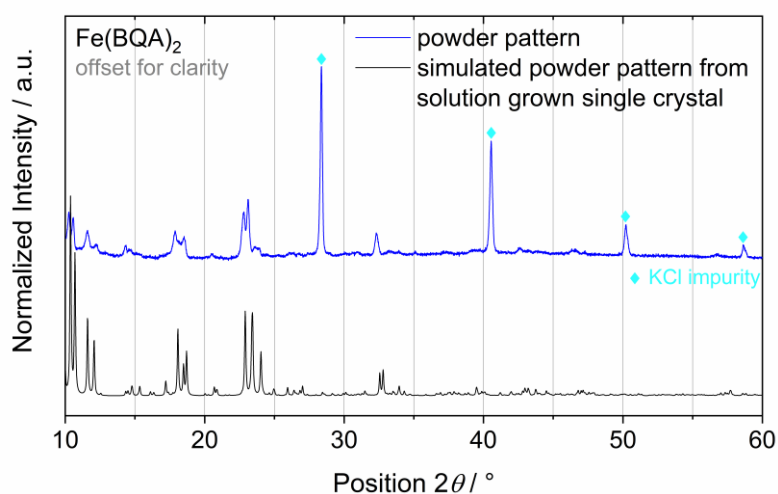

**Fig. S10** Powder XRD pattern of  $\text{Fe}(\text{BQA})_2$  source material. A reference pattern simulated from single crystal XRD data is shown to prove the identity of the solid state structures.

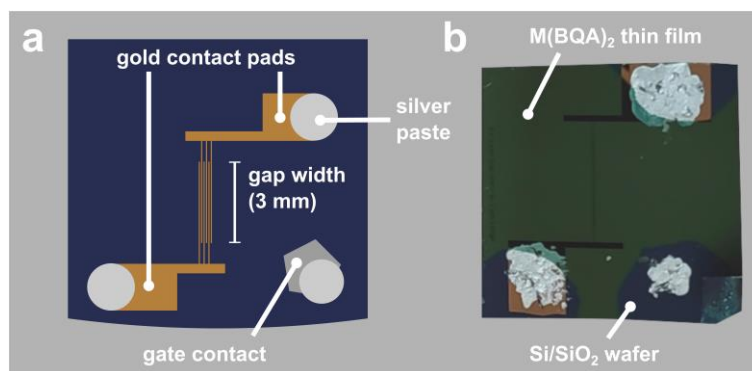

**Fig. S11** Sample structure for electrical characterisation in bottom-gate bottom-contact field-effect transistor geometry. (a) Scheme and (b) Photography.

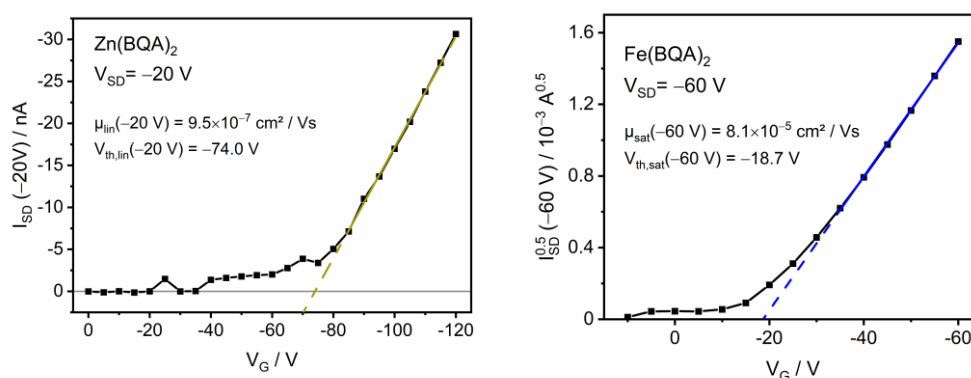

**Fig. S12** Transfer curves of thin films of Zn(BQA)<sub>2</sub> (d=88 nm) and Fe(BQA)<sub>2</sub>.

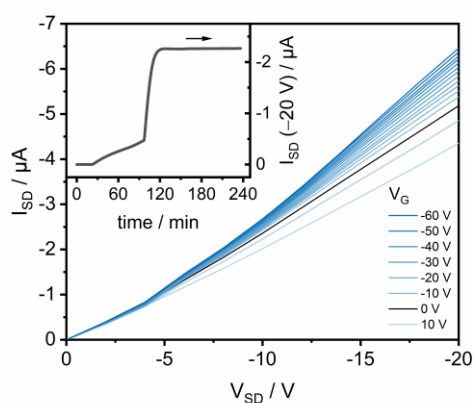

**Fig. S13** Output characteristics of a Fe(BQA)<sub>2</sub> thin film at air after several hours. Inset: Current evolution during venting.

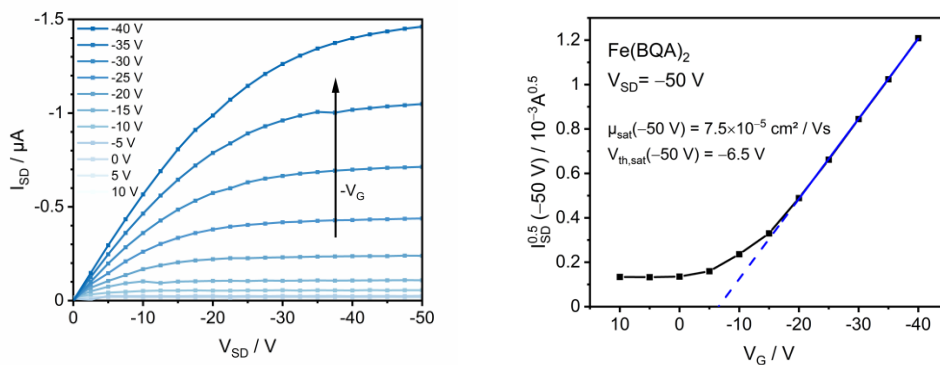

**Fig. S14** Output and transfer characteristics of an  $\text{Fe}(\text{BQA})_2$  thin film (10  $\mu\text{m}$  channel length and 30 mm channel width). The evaporation source was filled at air.

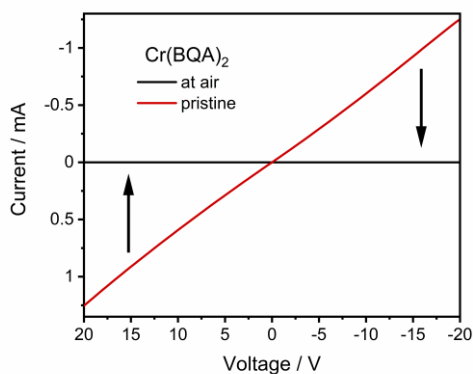

**Fig. S15** Current supported by a  $\text{Cr}(\text{BQA})_2$  thin film in between interdigitated electrodes. Film thickness was 69 nm. After venting the preparation chamber, the current falls below the detection limit, as indicated by the arrows.

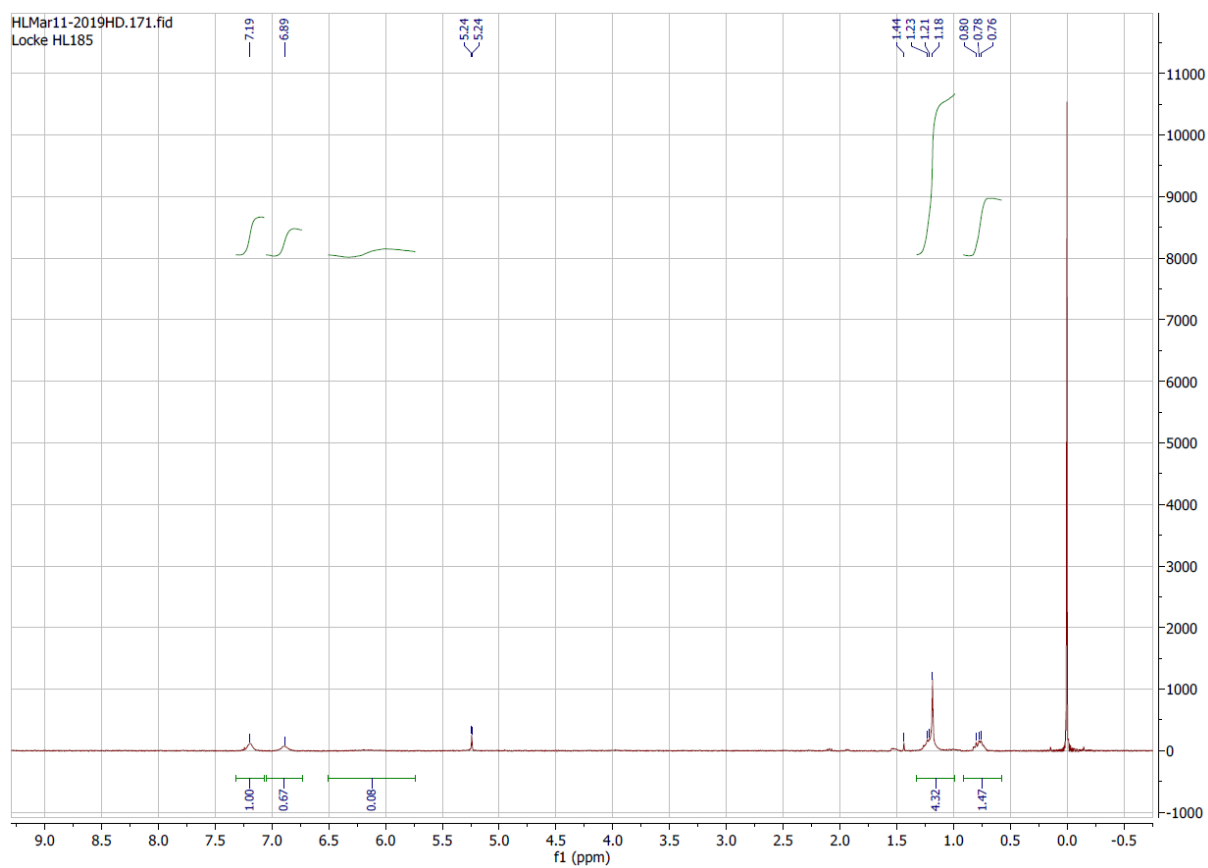

**Fig. S16**  $^1\text{H-NMR}$  ( $\text{CD}_2\text{Cl}_2$ ) spectrum of  $\text{Fe}(\text{BQA})_2$

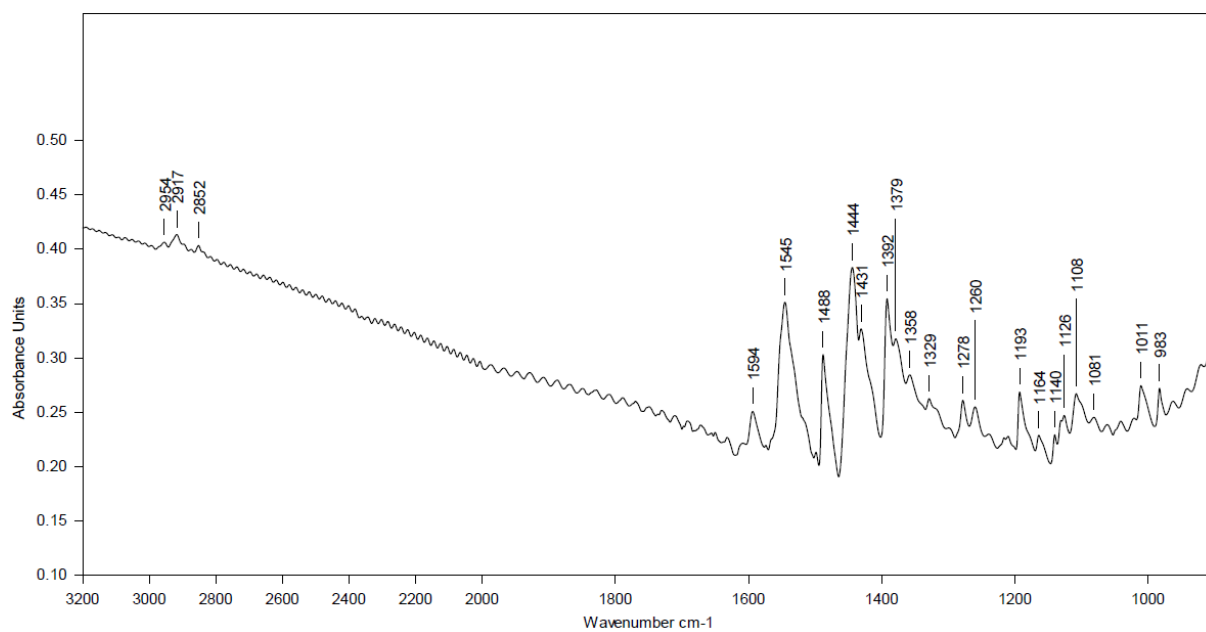

**Fig. S17** IR spectrum of Fe(BQA)<sub>2</sub>

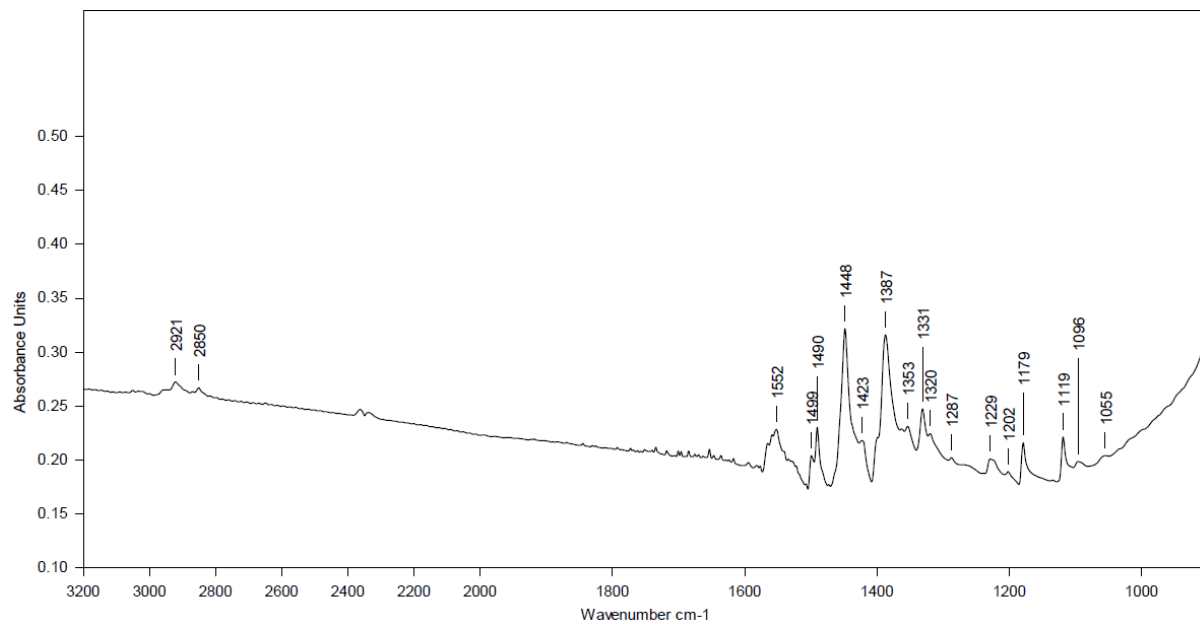

**Fig. S18** IR spectrum of Mn(BQA)<sub>2</sub>

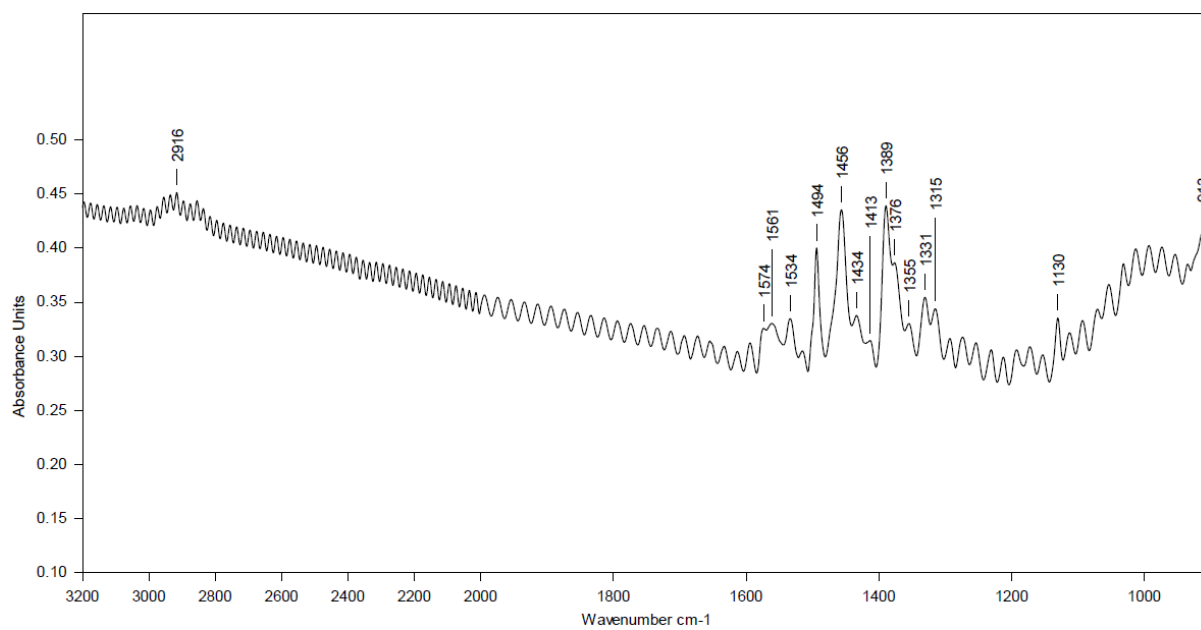

**Fig. S19** IR spectrum of Cr(BQA)<sub>2</sub>

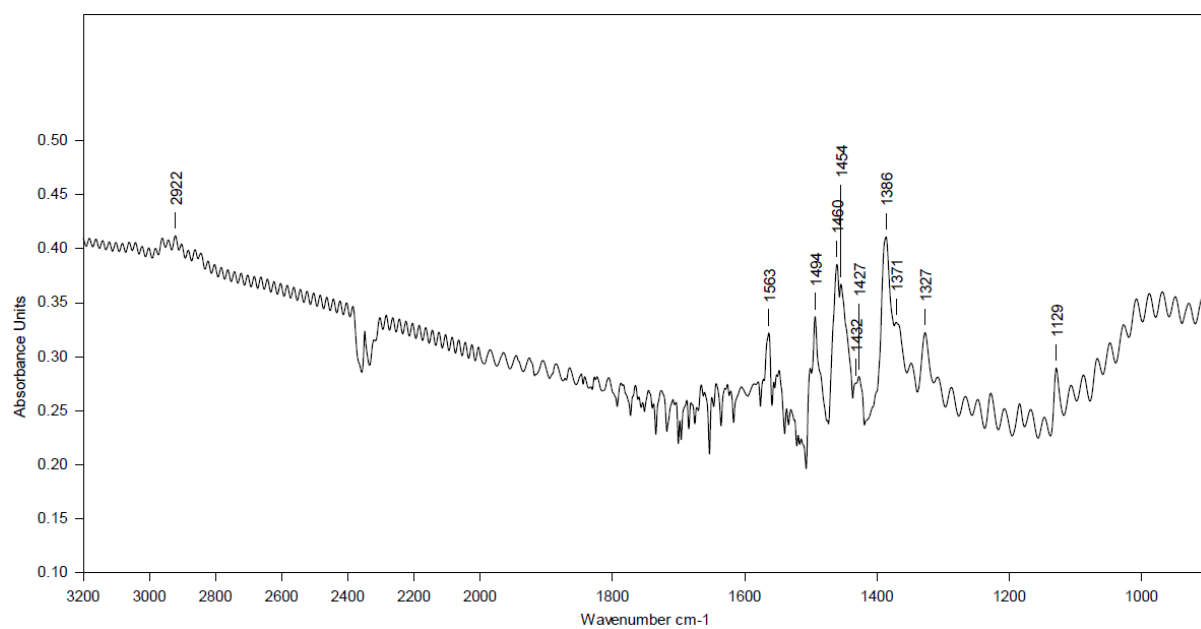

**Fig. S20** IR spectrum of [Cr(BQA)<sub>2</sub>]<sub>2</sub>Cl

## Crystallography

Crystallographic data were collected at low temperatures (100 K) using  $\varphi$ - and  $\omega$ -scans on a BRUKER D8 Venture system equipped with dual  $\mu$ S microfocus sources, a PHOTON100 detector and an OXFORD CRYOSYSTEMS 700 low temperature system. Mo- $K_{\alpha}$  radiation with wavelength 0.71073 Å or Cu- $K_{\alpha}$  radiation with wavelength 1.54178 Å and a collimating Quazar multilayer mirror were used. Semi-empirical absorption corrections from equivalents were applied using SADABS-2016/2 [1] the space groups were determined by systematic absences using XPREP and the structures were solved by direct methods using SHELXT. [2]

Refinement for all structures was performed against  $F^2$  on all data by full-matrix least squares using SHELXL. [3] All non-hydrogen atoms were refined anisotropically and C-H hydrogen atoms were positioned at geometrically calculated positions and refined using a riding model. The isotropic displacement parameters of all hydrogen atoms were fixed to 1.2x or 1.5x ( $\text{CH}_3$  hydrogens) the  $U_{eq}$  value of the atoms they are linked to.

The crystallographic data were deposited at the Cambridge Crystallographic Data Centre as CCDC 1897889-1897893 and 2057276 and can be obtained free of charge. [4]

### [Zn(BQA)<sub>2</sub>]

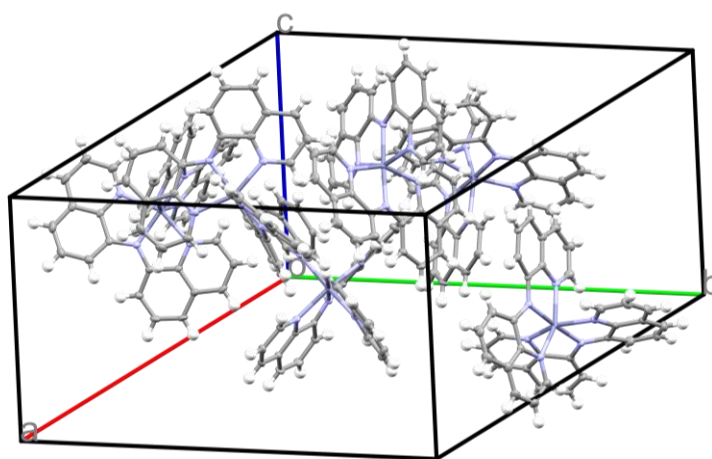

**Fig. S21** Unit cell with complete molecules of  $\text{Zn}(\text{BQA})_2$  crystallized from THF

The unit cell of  $[\text{Zn}(\text{BQA})_2]$  was determined using 9567 reflections and the structure was solved in the hexagonal space group  $P6_1$ . Partial racemic twinning was found and the twin ratio was refined and converged to 0.035(9). The asymmetric unit contains one molecule of  $[\text{Zn}(\text{BQA})_2]$  as well as heavily disordered solvent molecules. The SQUEEZE [5] method as implemented in Platon[6] was used to include a model for the disordered solvent molecules. The obtained model was added as .fab-file to the refinement using SHELXL. SQUEEZE found one independent void with disordered solvent, located at 0.0 0.0 0.0, with a volume of 1179 Å<sup>3</sup>. The equivalent of 279 electrons were identified in the void. This number of electrons corresponds to approximately 7 molecules of THF in the unit cell; however, there could also be hexane from the vapor diffusion in the crystal lattice which would change the amount of solvent molecules slightly.



**Table S4.** Crystal data and structure refinement for [Zn(BQA)<sub>2</sub>].

---

|                                          |                                                    |           |
|------------------------------------------|----------------------------------------------------|-----------|
| CCDC No.                                 | 1897889                                            |           |
| Empirical formula                        | C <sub>36</sub> H <sub>24</sub> N <sub>6</sub> Zn  |           |
| Formula weight                           | 605.98                                             |           |
| Temperature                              | 100(2) K                                           |           |
| Wavelength                               | 0.71073 Å                                          |           |
| Crystal system                           | Hexagonal                                          |           |
| Space group                              | <i>P</i> 6 <sub>1</sub>                            |           |
| Unit cell dimensions                     | a = 20.6945(4) Å                                   | α = 90°.  |
|                                          | b = 20.6945(4) Å                                   | β = 90°.  |
|                                          | c = 13.5955(3) Å                                   | γ = 120°. |
| Volume                                   | 5042.4(2) Å <sup>3</sup>                           |           |
| Z                                        | 6                                                  |           |
| Density (calculated)                     | 1.197 Mg/m <sup>3</sup>                            |           |
| Absorption coefficient                   | 0.762 mm <sup>-1</sup>                             |           |
| <i>F</i> (000)                           | 1872                                               |           |
| Crystal size                             | 0.980 x 0.163 x 0.137 mm <sup>3</sup>              |           |
| Theta range for data collection          | 2.273 to 29.129°.                                  |           |
| Index ranges                             | -28 ≤ h ≤ 28, -28 ≤ k ≤ 28, -18 ≤ l ≤ 18           |           |
| Reflections collected                    | 149185                                             |           |
| Independent reflections                  | 9051 [R(int) = 0.1439]                             |           |
| Completeness to theta = 25.242°          | 99.9 %                                             |           |
| Absorption correction                    | Semi-empirical from equivalents                    |           |
| Refinement method                        | Full-matrix least-squares on <i>F</i> <sup>2</sup> |           |
| Data / restraints / parameters           | 9051 / 1 / 389                                     |           |
| Goodness-of-fit on <i>F</i> <sup>2</sup> | 0.980                                              |           |
| Final R indices [I > 2σ(I)]              | R1 = 0.0296, wR2 = 0.0645                          |           |
| R indices (all data)                     | R1 = 0.0377, wR2 = 0.0664                          |           |
| Absolute structure parameter             | 0.035(9)                                           |           |
| Largest diff. peak and hole              | 0.342 and -0.302 e.Å <sup>-3</sup>                 |           |

---

**Table S5.** Atomic coordinates ( $\times 10^4$ ) and equivalent isotropic displacement parameters ( $\text{\AA}^2 \times 10^3$ ) for  $[\text{Zn}(\text{BQA})_2]$ .  $U(\text{eq})$  is defined as one third of the trace of the orthogonalized  $U_{ij}$  tensor.

|       | x       | y       | z       | $U(\text{eq})$ |
|-------|---------|---------|---------|----------------|
| Zn(1) | 755(1)  | 5084(1) | 4934(1) | 16(1)          |
| N(1)  | 412(1)  | 5842(1) | 4385(1) | 19(1)          |
| N(2)  | 1058(1) | 5853(1) | 6072(1) | 17(1)          |
| N(3)  | 1287(1) | 4700(1) | 5987(1) | 17(1)          |
| N(11) | 1738(1) | 5591(1) | 3970(1) | 17(1)          |
| N(12) | 500(1)  | 4282(1) | 3863(1) | 18(1)          |
| N(13) | -345(1) | 4188(1) | 5380(1) | 18(1)          |
| C(1)  | 104(1)  | 5818(2) | 3522(2) | 24(1)          |
| C(2)  | -39(2)  | 6378(2) | 3199(2) | 30(1)          |
| C(3)  | 128(2)  | 6963(2) | 3802(2) | 29(1)          |
| C(4)  | 459(2)  | 7020(2) | 4726(2) | 24(1)          |
| C(5)  | 607(1)  | 6442(1) | 4996(2) | 18(1)          |
| C(6)  | 977(1)  | 6462(1) | 5906(2) | 18(1)          |
| C(7)  | 1233(2) | 7111(2) | 6468(2) | 25(1)          |
| C(8)  | 1079(2) | 7680(2) | 6200(2) | 28(1)          |
| C(9)  | 694(2)  | 7641(2) | 5364(2) | 31(1)          |
| C(10) | 1306(1) | 5697(1) | 6920(2) | 16(1)          |
| C(11) | 1387(1) | 6008(1) | 7863(2) | 19(1)          |
| C(12) | 1659(2) | 5780(2) | 8659(2) | 25(1)          |
| C(13) | 1864(1) | 5253(2) | 8571(2) | 22(1)          |
| C(14) | 1762(1) | 4889(2) | 7653(2) | 20(1)          |
| C(15) | 1462(1) | 5090(1) | 6854(2) | 17(1)          |
| C(16) | 1923(2) | 4306(2) | 7501(2) | 25(1)          |
| C(17) | 1758(2) | 3937(2) | 6625(2) | 27(1)          |
| C(18) | 1416(1) | 4145(2) | 5887(2) | 22(1)          |
| C(21) | 2351(1) | 6243(1) | 4076(2) | 20(1)          |
| C(22) | 2922(1) | 6546(2) | 3367(2) | 21(1)          |
| C(23) | 2824(1) | 6156(2) | 2513(2) | 21(1)          |
| C(24) | 2167(1) | 5462(1) | 2359(2) | 18(1)          |
| C(25) | 1634(1) | 5189(1) | 3128(2) | 16(1)          |
| C(26) | 944(1)  | 4479(1) | 3045(2) | 16(1)          |
| C(27) | 809(2)  | 4127(2) | 2130(2) | 21(1)          |
| C(28) | 1337(2) | 4417(2) | 1367(2) | 24(1)          |

|       |          |         |         |       |
|-------|----------|---------|---------|-------|
| C(29) | 2010(2)  | 5060(2) | 1467(2) | 23(1) |
| C(30) | -90(1)   | 3587(1) | 4042(2) | 18(1) |
| C(31) | -281(2)  | 2912(2) | 3594(2) | 27(1) |
| C(32) | -929(2)  | 2241(2) | 3855(2) | 31(1) |
| C(33) | -1400(2) | 2214(2) | 4570(2) | 32(1) |
| C(34) | -1220(2) | 2873(2) | 5105(2) | 23(1) |
| C(35) | -558(1)  | 3548(1) | 4860(2) | 18(1) |
| C(36) | -1647(2) | 2898(2) | 5894(2) | 29(1) |
| C(37) | -1419(2) | 3538(2) | 6412(2) | 29(1) |
| C(38) | -759(2)  | 4179(2) | 6131(2) | 24(1) |

---

**Table S6.** Bond lengths [ $\text{\AA}$ ] and angles [ $^\circ$ ] for  $[\text{Zn}(\text{BQA})_2]$ .

|             |          |             |          |
|-------------|----------|-------------|----------|
| Zn(1)-N(12) | 2.067(2) | C(3)-C(4)   | 1.407(4) |
| Zn(1)-N(2)  | 2.080(2) | C(3)-H(3)   | 0.9500   |
| Zn(1)-N(1)  | 2.154(2) | C(4)-C(9)   | 1.420(4) |
| Zn(1)-N(3)  | 2.183(2) | C(4)-C(5)   | 1.423(4) |
| Zn(1)-N(13) | 2.183(2) | C(5)-C(6)   | 1.445(3) |
| Zn(1)-N(11) | 2.195(2) | C(6)-C(7)   | 1.399(3) |
| N(1)-C(1)   | 1.325(3) | C(7)-C(8)   | 1.412(4) |
| N(1)-C(5)   | 1.374(3) | C(7)-H(7)   | 0.9500   |
| N(2)-C(10)  | 1.364(3) | C(8)-C(9)   | 1.367(4) |
| N(2)-C(6)   | 1.371(3) | C(8)-H(8)   | 0.9500   |
| N(3)-C(18)  | 1.311(3) | C(9)-H(9)   | 0.9500   |
| N(3)-C(15)  | 1.371(3) | C(10)-C(11) | 1.407(3) |
| N(11)-C(21) | 1.320(3) | C(10)-C(15) | 1.447(3) |
| N(11)-C(25) | 1.367(3) | C(11)-C(12) | 1.406(3) |
| N(12)-C(30) | 1.366(3) | C(11)-H(11) | 0.9500   |
| N(12)-C(26) | 1.368(3) | C(12)-C(13) | 1.359(4) |
| N(13)-C(38) | 1.326(3) | C(12)-H(12) | 0.9500   |
| N(13)-C(35) | 1.366(3) | C(13)-C(14) | 1.418(3) |
| C(1)-C(2)   | 1.402(4) | C(13)-H(13) | 0.9500   |
| C(1)-H(1)   | 0.9500   | C(14)-C(15) | 1.413(3) |
| C(2)-C(3)   | 1.356(4) | C(14)-C(16) | 1.419(4) |
| C(2)-H(2)   | 0.9500   | C(16)-C(17) | 1.362(4) |

|                  |           |                   |            |
|------------------|-----------|-------------------|------------|
| C(16)-H(16)      | 0.9500    | N(2)-Zn(1)-N(3)   | 77.08(8)   |
| C(17)-C(18)      | 1.413(4)  | N(1)-Zn(1)-N(3)   | 154.40(8)  |
| C(17)-H(17)      | 0.9500    | N(12)-Zn(1)-N(13) | 77.02(8)   |
| C(18)-H(18)      | 0.9500    | N(2)-Zn(1)-N(13)  | 103.31(8)  |
| C(21)-C(22)      | 1.406(3)  | N(1)-Zn(1)-N(13)  | 97.50(8)   |
| C(21)-H(21)      | 0.9500    | N(3)-Zn(1)-N(13)  | 90.64(8)   |
| C(22)-C(23)      | 1.369(4)  | N(12)-Zn(1)-N(11) | 76.50(8)   |
| C(22)-H(22)      | 0.9500    | N(2)-Zn(1)-N(11)  | 103.05(8)  |
| C(23)-C(24)      | 1.414(4)  | N(1)-Zn(1)-N(11)  | 90.53(8)   |
| C(23)-H(23)      | 0.9500    | N(3)-Zn(1)-N(11)  | 92.88(7)   |
| C(24)-C(29)      | 1.413(3)  | N(13)-Zn(1)-N(11) | 153.53(8)  |
| C(24)-C(25)      | 1.417(3)  | C(1)-N(1)-C(5)    | 119.2(2)   |
| C(25)-C(26)      | 1.452(3)  | C(1)-N(1)-Zn(1)   | 127.36(19) |
| C(26)-C(27)      | 1.399(3)  | C(5)-N(1)-Zn(1)   | 113.18(16) |
| C(27)-C(28)      | 1.405(3)  | C(10)-N(2)-C(6)   | 126.3(2)   |
| C(27)-H(27)      | 0.9500    | C(10)-N(2)-Zn(1)  | 116.85(16) |
| C(28)-C(29)      | 1.369(4)  | C(6)-N(2)-Zn(1)   | 116.88(15) |
| C(28)-H(28)      | 0.9500    | C(18)-N(3)-C(15)  | 119.7(2)   |
| C(29)-H(29)      | 0.9500    | C(18)-N(3)-Zn(1)  | 127.71(17) |
| C(30)-C(31)      | 1.388(4)  | C(15)-N(3)-Zn(1)  | 112.54(16) |
| C(30)-C(35)      | 1.450(3)  | C(21)-N(11)-C(25) | 119.5(2)   |
| C(31)-C(32)      | 1.410(4)  | C(21)-N(11)-Zn(1) | 127.70(17) |
| C(31)-H(31)      | 0.9500    | C(25)-N(11)-Zn(1) | 112.50(16) |
| C(32)-C(33)      | 1.358(4)  | C(30)-N(12)-C(26) | 124.9(2)   |
| C(32)-H(32)      | 0.9500    | C(30)-N(12)-Zn(1) | 117.04(15) |
| C(33)-C(34)      | 1.422(4)  | C(26)-N(12)-Zn(1) | 117.98(17) |
| C(33)-H(33)      | 0.9500    | C(38)-N(13)-C(35) | 119.4(2)   |
| C(34)-C(36)      | 1.407(4)  | C(38)-N(13)-Zn(1) | 128.17(18) |
| C(34)-C(35)      | 1.424(3)  | C(35)-N(13)-Zn(1) | 111.89(15) |
| C(36)-C(37)      | 1.360(4)  | N(1)-C(1)-C(2)    | 122.8(3)   |
| C(36)-H(36)      | 0.9500    | N(1)-C(1)-H(1)    | 118.6      |
| C(37)-C(38)      | 1.401(4)  | C(2)-C(1)-H(1)    | 118.6      |
| C(37)-H(37)      | 0.9500    | C(3)-C(2)-C(1)    | 118.9(3)   |
| C(38)-H(38)      | 0.9500    | C(3)-C(2)-H(2)    | 120.6      |
|                  |           | C(1)-C(2)-H(2)    | 120.6      |
| N(12)-Zn(1)-N(2) | 175.29(8) | C(2)-C(3)-C(4)    | 120.8(3)   |
| N(12)-Zn(1)-N(1) | 107.22(8) | C(2)-C(3)-H(3)    | 119.6      |
| N(2)-Zn(1)-N(1)  | 77.44(8)  | C(4)-C(3)-H(3)    | 119.6      |
| N(12)-Zn(1)-N(3) | 98.24(8)  | C(3)-C(4)-C(9)    | 123.6(3)   |

|                   |          |                   |          |
|-------------------|----------|-------------------|----------|
| C(3)-C(4)-C(5)    | 117.4(3) | C(16)-C(17)-H(17) | 120.8    |
| C(9)-C(4)-C(5)    | 118.9(2) | C(18)-C(17)-H(17) | 120.8    |
| N(1)-C(5)-C(4)    | 120.9(2) | N(3)-C(18)-C(17)  | 123.1(2) |
| N(1)-C(5)-C(6)    | 117.1(2) | N(3)-C(18)-H(18)  | 118.5    |
| C(4)-C(5)-C(6)    | 122.0(2) | C(17)-C(18)-H(18) | 118.5    |
| N(2)-C(6)-C(7)    | 129.1(2) | N(11)-C(21)-C(22) | 123.1(2) |
| N(2)-C(6)-C(5)    | 114.9(2) | N(11)-C(21)-H(21) | 118.5    |
| C(7)-C(6)-C(5)    | 115.9(2) | C(22)-C(21)-H(21) | 118.5    |
| C(6)-C(7)-C(8)    | 121.7(3) | C(23)-C(22)-C(21) | 118.3(2) |
| C(6)-C(7)-H(7)    | 119.2    | C(23)-C(22)-H(22) | 120.8    |
| C(8)-C(7)-H(7)    | 119.2    | C(21)-C(22)-H(22) | 120.8    |
| C(9)-C(8)-C(7)    | 122.2(3) | C(22)-C(23)-C(24) | 120.5(2) |
| C(9)-C(8)-H(8)    | 118.9    | C(22)-C(23)-H(23) | 119.8    |
| C(7)-C(8)-H(8)    | 118.9    | C(24)-C(23)-H(23) | 119.8    |
| C(8)-C(9)-C(4)    | 119.2(3) | C(29)-C(24)-C(23) | 123.1(2) |
| C(8)-C(9)-H(9)    | 120.4    | C(29)-C(24)-C(25) | 119.6(2) |
| C(4)-C(9)-H(9)    | 120.4    | C(23)-C(24)-C(25) | 117.2(2) |
| N(2)-C(10)-C(11)  | 129.3(2) | N(11)-C(25)-C(24) | 121.4(2) |
| N(2)-C(10)-C(15)  | 115.3(2) | N(11)-C(25)-C(26) | 117.2(2) |
| C(11)-C(10)-C(15) | 115.2(2) | C(24)-C(25)-C(26) | 121.4(2) |
| C(12)-C(11)-C(10) | 121.6(2) | N(12)-C(26)-C(27) | 129.7(2) |
| C(12)-C(11)-H(11) | 119.2    | N(12)-C(26)-C(25) | 114.3(2) |
| C(10)-C(11)-H(11) | 119.2    | C(27)-C(26)-C(25) | 115.8(2) |
| C(13)-C(12)-C(11) | 122.7(2) | C(26)-C(27)-C(28) | 121.6(2) |
| C(13)-C(12)-H(12) | 118.7    | C(26)-C(27)-H(27) | 119.2    |
| C(11)-C(12)-H(12) | 118.7    | C(28)-C(27)-H(27) | 119.2    |
| C(12)-C(13)-C(14) | 118.7(2) | C(29)-C(28)-C(27) | 122.5(2) |
| C(12)-C(13)-H(13) | 120.6    | C(29)-C(28)-H(28) | 118.7    |
| C(14)-C(13)-H(13) | 120.6    | C(27)-C(28)-H(28) | 118.7    |
| C(15)-C(14)-C(13) | 119.4(2) | C(28)-C(29)-C(24) | 118.7(2) |
| C(15)-C(14)-C(16) | 117.6(2) | C(28)-C(29)-H(29) | 120.6    |
| C(13)-C(14)-C(16) | 122.9(2) | C(24)-C(29)-H(29) | 120.6    |
| N(3)-C(15)-C(14)  | 120.9(2) | N(12)-C(30)-C(31) | 129.5(2) |
| N(3)-C(15)-C(10)  | 117.1(2) | N(12)-C(30)-C(35) | 114.6(2) |
| C(14)-C(15)-C(10) | 122.0(2) | C(31)-C(30)-C(35) | 115.8(2) |
| C(17)-C(16)-C(14) | 120.2(2) | C(30)-C(31)-C(32) | 122.1(3) |
| C(17)-C(16)-H(16) | 119.9    | C(30)-C(31)-H(31) | 119.0    |
| C(14)-C(16)-H(16) | 119.9    | C(32)-C(31)-H(31) | 119.0    |
| C(16)-C(17)-C(18) | 118.3(2) | C(33)-C(32)-C(31) | 122.1(3) |

|                   |          |                   |          |
|-------------------|----------|-------------------|----------|
| C(33)-C(32)-H(32) | 118.9    | C(34)-C(35)-C(30) | 121.5(2) |
| C(31)-C(32)-H(32) | 118.9    | C(37)-C(36)-C(34) | 120.8(3) |
| C(32)-C(33)-C(34) | 119.2(3) | C(37)-C(36)-H(36) | 119.6    |
| C(32)-C(33)-H(33) | 120.4    | C(34)-C(36)-H(36) | 119.6    |
| C(34)-C(33)-H(33) | 120.4    | C(36)-C(37)-C(38) | 118.7(3) |
| C(36)-C(34)-C(33) | 123.8(3) | C(36)-C(37)-H(37) | 120.7    |
| C(36)-C(34)-C(35) | 117.2(3) | C(38)-C(37)-H(37) | 120.7    |
| C(33)-C(34)-C(35) | 118.9(2) | N(13)-C(38)-C(37) | 122.8(3) |
| N(13)-C(35)-C(34) | 121.0(2) | N(13)-C(38)-H(38) | 118.6    |
| N(13)-C(35)-C(30) | 117.5(2) | C(37)-C(38)-H(38) | 118.6    |

**Table S7.** Anisotropic displacement parameters ( $\text{\AA}^2 \times 10^3$ ) for  $[\text{Zn}(\text{BQA})_2]$ . The anisotropic displacement factor exponent takes the form:  $-2p^2 [h^2 a^{*2} U^{11} + \dots + 2 h k a^* b^* U^{12}]$

|       | $U^{11}$ | $U^{22}$ | $U^{33}$ | $U^{23}$ | $U^{13}$ | $U^{12}$ |
|-------|----------|----------|----------|----------|----------|----------|
| Zn(1) | 15(1)    | 20(1)    | 11(1)    | -1(1)    | 0(1)     | 7(1)     |
| N(1)  | 14(1)    | 23(1)    | 16(1)    | 0(1)     | 0(1)     | 7(1)     |
| N(2)  | 16(1)    | 21(1)    | 12(1)    | -1(1)    | -1(1)    | 8(1)     |
| N(3)  | 17(1)    | 24(1)    | 12(1)    | 2(1)     | 4(1)     | 11(1)    |
| N(11) | 17(1)    | 19(1)    | 12(1)    | 0(1)     | -2(1)    | 8(1)     |
| N(12) | 15(1)    | 22(1)    | 13(1)    | -1(1)    | 0(1)     | 7(1)     |
| N(13) | 17(1)    | 22(1)    | 15(1)    | 2(1)     | 0(1)     | 11(1)    |
| C(1)  | 20(1)    | 26(1)    | 22(1)    | -1(1)    | -6(1)    | 7(1)     |
| C(2)  | 24(1)    | 30(2)    | 29(1)    | 3(1)     | -8(1)    | 9(1)     |
| C(3)  | 23(2)    | 30(2)    | 38(2)    | 6(1)     | -3(1)    | 16(1)    |
| C(4)  | 19(1)    | 26(1)    | 29(1)    | 3(1)     | 4(1)     | 12(1)    |
| C(5)  | 11(1)    | 20(1)    | 20(1)    | 1(1)     | 3(1)     | 5(1)     |
| C(6)  | 14(1)    | 21(1)    | 16(1)    | 1(1)     | 4(1)     | 7(1)     |
| C(7)  | 26(1)    | 25(1)    | 20(1)    | -2(1)    | 3(1)     | 11(1)    |
| C(8)  | 35(2)    | 21(1)    | 26(1)    | -2(1)    | 6(1)     | 12(1)    |
| C(9)  | 37(2)    | 29(2)    | 34(2)    | 4(1)     | 6(1)     | 23(1)    |
| C(10) | 11(1)    | 20(1)    | 14(1)    | 0(1)     | 3(1)     | 4(1)     |
| C(11) | 17(1)    | 23(1)    | 16(1)    | -3(1)    | 2(1)     | 9(1)     |
| C(12) | 21(1)    | 31(2)    | 13(1)    | -3(1)    | -1(1)    | 6(1)     |

|       |       |       |       |       |       |       |
|-------|-------|-------|-------|-------|-------|-------|
| C(13) | 16(1) | 31(2) | 14(1) | 1(1)  | -2(1) | 8(1)  |
| C(14) | 15(1) | 28(1) | 16(1) | 4(1)  | 3(1)  | 9(1)  |
| C(15) | 10(1) | 23(1) | 14(1) | 1(1)  | 2(1)  | 6(1)  |
| C(16) | 23(1) | 35(2) | 20(1) | 5(1)  | 0(1)  | 17(1) |
| C(17) | 31(2) | 36(2) | 25(1) | 1(1)  | 2(1)  | 24(1) |
| C(18) | 23(1) | 30(2) | 17(1) | -1(1) | 2(1)  | 15(1) |
| C(21) | 19(1) | 23(1) | 17(1) | 0(1)  | -1(1) | 10(1) |
| C(22) | 15(1) | 21(1) | 24(1) | 2(1)  | 0(1)  | 7(1)  |
| C(23) | 16(1) | 27(1) | 19(1) | 9(1)  | 6(1)  | 12(1) |
| C(24) | 18(1) | 23(1) | 16(1) | 3(1)  | 3(1)  | 12(1) |
| C(25) | 15(1) | 21(1) | 12(1) | 1(1)  | -1(1) | 10(1) |
| C(26) | 15(1) | 21(1) | 14(1) | 0(1)  | 0(1)  | 10(1) |
| C(27) | 20(1) | 24(1) | 15(1) | -3(1) | -2(1) | 9(1)  |
| C(28) | 30(2) | 33(2) | 12(1) | -4(1) | 0(1)  | 18(1) |
| C(29) | 25(1) | 34(2) | 13(1) | 1(1)  | 7(1)  | 16(1) |
| C(30) | 18(1) | 22(1) | 13(1) | 2(1)  | -2(1) | 9(1)  |
| C(31) | 31(2) | 26(2) | 21(1) | -3(1) | 0(1)  | 13(1) |
| C(32) | 37(2) | 19(1) | 27(1) | -3(1) | -4(1) | 6(1)  |
| C(33) | 28(2) | 23(2) | 30(1) | 4(1)  | -3(1) | 1(1)  |
| C(34) | 19(1) | 26(1) | 20(1) | 6(1)  | -2(1) | 8(1)  |
| C(35) | 14(1) | 22(1) | 16(1) | 4(1)  | -1(1) | 8(1)  |
| C(36) | 21(1) | 31(2) | 31(2) | 14(1) | 8(1)  | 10(1) |
| C(37) | 27(2) | 34(2) | 29(2) | 10(1) | 12(1) | 17(1) |
| C(38) | 24(1) | 27(2) | 22(1) | 5(1)  | 5(1)  | 15(1) |

---

**Table S8.** Hydrogen coordinates ( $\times 10^4$ ) and isotropic displacement parameters ( $\text{\AA}^2 \times 10^3$ ) for  $[\text{Zn}(\text{BQA})_2]$ .

|       | x     | y    | z    | U(eq) |
|-------|-------|------|------|-------|
| H(1)  | -26   | 5403 | 3103 | 29    |
| H(2)  | -249  | 6349 | 2568 | 36    |
| H(3)  | 21    | 7338 | 3599 | 35    |
| H(7)  | 1517  | 7171 | 7044 | 30    |
| H(8)  | 1248  | 8104 | 6614 | 34    |
| H(9)  | 585   | 8024 | 5212 | 37    |
| H(11) | 1255  | 6382 | 7965 | 23    |
| H(12) | 1701  | 6003 | 9284 | 30    |
| H(13) | 2072  | 5131 | 9114 | 26    |
| H(16) | 2147  | 4172 | 8012 | 30    |
| H(17) | 1870  | 3551 | 6514 | 33    |
| H(18) | 1273  | 3868 | 5291 | 27    |
| H(21) | 2410  | 6521 | 4658 | 24    |
| H(22) | 3364  | 7009 | 3477 | 25    |
| H(23) | 3200  | 6353 | 2020 | 25    |
| H(27) | 349   | 3680 | 2021 | 25    |
| H(28) | 1223  | 4157 | 758  | 29    |
| H(29) | 2364  | 5233 | 948  | 28    |
| H(31) | 35    | 2901 | 3095 | 32    |
| H(32) | -1039 | 1795 | 3521 | 38    |
| H(33) | -1845 | 1759 | 4711 | 39    |
| H(36) | -2101 | 2462 | 6067 | 35    |
| H(37) | -1702 | 3550 | 6955 | 35    |
| H(38) | -600  | 4625 | 6494 | 28    |



## Vacuum-grown [Zn(BQA)<sub>2</sub>]

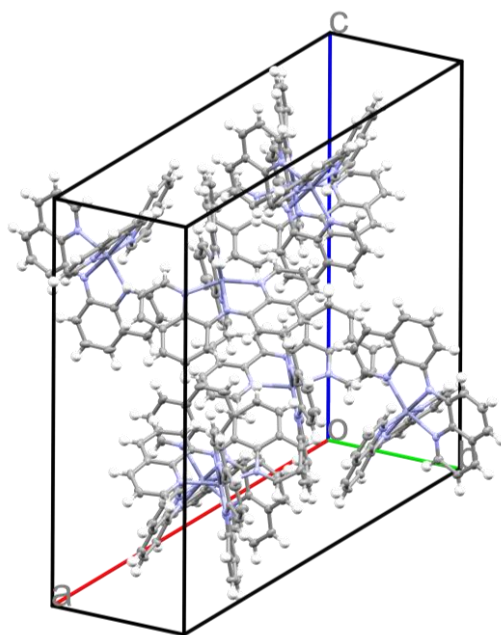

**Fig. S22** Unit cell with complete molecules of vapor-grown Zn(BQA)<sub>2</sub>

The unit cell of [Zn(BQA)<sub>2</sub>] obtained from sublimation was determined using 9782 reflections and the structure was solved in the monoclinic space group *C2/c*. The structure was refined as a pseudo merohedral twin. The twin ratio was refined and converged to 0.035(9). The asymmetric unit contains one molecule of [Zn(BQA)<sub>2</sub>].

**Table S9.** Crystal data and structure refinement for vacuum grown [Zn(BQA)<sub>2</sub>].

|                        |                                                           |                                          |
|------------------------|-----------------------------------------------------------|------------------------------------------|
| CCDC No.               | 1897892                                                   |                                          |
| Empirical formula      | C <sub>36</sub> H <sub>24</sub> N <sub>6</sub> Zn         |                                          |
| Formula weight         | 605.98                                                    |                                          |
| Temperature            | 100(2) K                                                  |                                          |
| Wavelength             | 1.54178 Å                                                 |                                          |
| Crystal system         | Monoclinic                                                |                                          |
| Space group            | <i>C2/c</i>                                               |                                          |
| Unit cell dimensions   | a = 19.5616(9) Å<br>b = 13.4711(6) Å<br>c = 22.5945(14) Å | α = 90°.<br>β = 113.988(3)°.<br>γ = 90°. |
| Volume                 | 5439.8(5) Å <sup>3</sup>                                  |                                          |
| Z                      | 8                                                         |                                          |
| Density (calculated)   | 1.480 Mg/m <sup>3</sup>                                   |                                          |
| Absorption coefficient | 1.556 mm <sup>-1</sup>                                    |                                          |
| <i>F</i> (000)         | 2496                                                      |                                          |

|                                 |                                          |
|---------------------------------|------------------------------------------|
| Crystal size                    | 0.058 x 0.057 x 0.036 mm <sup>3</sup>    |
| Theta range for data collection | 2.140 to 72.109°.                        |
| Index ranges                    | -24 ≤ h ≤ 24, -16 ≤ k ≤ 15, -27 ≤ l ≤ 27 |
| Reflections collected           | 95886                                    |
| Independent reflections         | 5366 [R(int) = 0.1319]                   |
| Completeness to theta = 67.679° | 100.0 %                                  |
| Absorption correction           | Semi-empirical from equivalents          |
| Refinement method               | Full-matrix least-squares on $F^2$       |
| Data / restraints / parameters  | 5366 / 0 / 389                           |
| Goodness-of-fit on $F^2$        | 1.908                                    |
| Final R indices [I>2σ(I)]       | R1 = 0.1157, wR2 = 0.3658                |
| R indices (all data)            | R1 = 0.1249, wR2 = 0.3765                |
| Largest diff. peak and hole     | 1.425 and -1.875 e.Å <sup>-3</sup>       |

**Table S10.** Atomic coordinates ( $\times 10^4$ ) and equivalent isotropic displacement parameters ( $\text{\AA}^2 \times 10^3$ ) for vacuum grown [Zn(BQA)<sub>2</sub>]. U(eq) is defined as one third of the trace of the orthogonalized  $U^{ij}$  tensor.

|       | x       | y       | z       | U(eq) |
|-------|---------|---------|---------|-------|
| Zn(1) | 6618(1) | 5680(1) | 7012(1) | 20(1) |
| N(1)  | 5642(3) | 6657(4) | 6626(3) | 20(1) |
| N(2)  | 6909(3) | 6715(4) | 6465(3) | 22(1) |
| N(3)  | 7705(3) | 5175(4) | 7101(3) | 22(1) |
| N(21) | 7092(3) | 6199(4) | 8012(3) | 23(1) |
| N(22) | 6308(3) | 4575(4) | 7496(3) | 22(1) |
| N(23) | 6053(3) | 4608(4) | 6241(3) | 20(1) |
| C(1)  | 5003(4) | 6554(5) | 6686(4) | 26(1) |
| C(2)  | 4407(4) | 7241(6) | 6418(4) | 30(2) |
| C(3)  | 4499(4) | 8047(6) | 6085(4) | 27(2) |
| C(4)  | 5173(4) | 8198(5) | 6025(3) | 23(1) |
| C(5)  | 5334(4) | 9043(5) | 5728(3) | 26(1) |
| C(6)  | 6016(5) | 9131(5) | 5716(4) | 26(1) |
| C(7)  | 6576(4) | 8390(5) | 5953(3) | 21(1) |
| C(8)  | 6446(4) | 7514(5) | 6227(3) | 20(1) |
| C(9)  | 5742(4) | 7453(5) | 6294(3) | 20(1) |

|       |         |         |         |       |
|-------|---------|---------|---------|-------|
| C(11) | 8096(5) | 4427(5) | 7456(4) | 29(2) |
| C(12) | 8758(5) | 4088(6) | 7422(4) | 35(2) |
| C(13) | 9006(4) | 4542(6) | 7000(4) | 31(2) |
| C(14) | 8593(4) | 5330(5) | 6603(3) | 25(1) |
| C(15) | 8792(4) | 5786(6) | 6140(4) | 29(2) |
| C(16) | 8353(5) | 6540(6) | 5769(4) | 29(2) |
| C(17) | 7718(4) | 6885(5) | 5852(3) | 24(1) |
| C(18) | 7501(4) | 6474(5) | 6323(3) | 21(1) |
| C(19) | 7944(4) | 5642(5) | 6683(3) | 22(1) |
| C(21) | 7504(5) | 6991(6) | 8248(4) | 31(2) |
| C(22) | 7782(5) | 7256(7) | 8907(5) | 37(2) |
| C(23) | 7626(4) | 6655(7) | 9327(4) | 33(2) |
| C(24) | 7183(4) | 5786(6) | 9095(4) | 27(2) |
| C(25) | 6960(5) | 5170(6) | 9493(4) | 34(2) |
| C(26) | 6464(6) | 4411(6) | 9207(4) | 36(2) |
| C(27) | 6211(5) | 4201(5) | 8540(4) | 28(2) |
| C(28) | 6463(4) | 4723(5) | 8133(3) | 22(1) |
| C(29) | 6924(4) | 5584(5) | 8421(3) | 23(1) |
| C(31) | 5923(4) | 4694(5) | 5624(4) | 26(1) |
| C(32) | 5565(5) | 3943(6) | 5168(4) | 28(2) |
| C(33) | 5369(5) | 3092(5) | 5387(4) | 29(2) |
| C(34) | 5529(4) | 2954(6) | 6048(4) | 27(1) |
| C(35) | 5416(5) | 2041(6) | 6307(4) | 38(2) |
| C(36) | 5636(6) | 1968(6) | 6969(4) | 38(2) |
| C(37) | 5925(5) | 2782(5) | 7383(4) | 29(2) |
| C(38) | 6027(4) | 3715(5) | 7154(3) | 21(1) |
| C(39) | 5864(4) | 3764(5) | 6470(3) | 22(1) |

**Table S11.** Bond lengths [ $\text{\AA}$ ] and angles [ $^\circ$ ] for vacuum grown  $[\text{Zn}(\text{BQA})_2]$ .

|             |          |            |           |
|-------------|----------|------------|-----------|
| Zn(1)-N(22) | 2.078(6) | Zn(1)-N(1) | 2.187(6)  |
| Zn(1)-N(2)  | 2.090(6) | N(1)-C(1)  | 1.319(10) |
| Zn(1)-N(3)  | 2.164(6) | N(1)-C(9)  | 1.368(9)  |
| Zn(1)-N(21) | 2.180(6) | N(2)-C(18) | 1.361(9)  |
| Zn(1)-N(23) | 2.184(6) | N(2)-C(8)  | 1.369(9)  |

|             |           |                   |           |
|-------------|-----------|-------------------|-----------|
| N(3)-C(11)  | 1.321(9)  | C(21)-H(21)       | 0.9500    |
| N(3)-C(19)  | 1.365(10) | C(22)-C(23)       | 1.372(14) |
| N(21)-C(21) | 1.312(10) | C(22)-H(22)       | 0.9500    |
| N(21)-C(29) | 1.377(10) | C(23)-C(24)       | 1.424(12) |
| N(22)-C(28) | 1.361(10) | C(23)-H(23)       | 0.9500    |
| N(22)-C(38) | 1.377(9)  | C(24)-C(25)       | 1.415(12) |
| N(23)-C(31) | 1.317(10) | C(24)-C(29)       | 1.423(10) |
| N(23)-C(39) | 1.361(9)  | C(25)-C(26)       | 1.377(14) |
| C(1)-C(2)   | 1.417(11) | C(25)-H(25)       | 0.9500    |
| C(1)-H(1)   | 0.9500    | C(26)-C(27)       | 1.409(12) |
| C(2)-C(3)   | 1.375(12) | C(26)-H(26)       | 0.9500    |
| C(2)-H(2)   | 0.9500    | C(27)-C(28)       | 1.396(10) |
| C(3)-C(4)   | 1.394(11) | C(27)-H(27)       | 0.9500    |
| C(3)-H(3)   | 0.9500    | C(28)-C(29)       | 1.452(10) |
| C(4)-C(5)   | 1.421(11) | C(31)-C(32)       | 1.410(10) |
| C(4)-C(9)   | 1.436(9)  | C(31)-H(31)       | 0.9500    |
| C(5)-C(6)   | 1.350(12) | C(32)-C(33)       | 1.365(11) |
| C(5)-H(5)   | 0.9500    | C(32)-H(32)       | 0.9500    |
| C(6)-C(7)   | 1.416(10) | C(33)-C(34)       | 1.408(11) |
| C(6)-H(6)   | 0.9500    | C(33)-H(33)       | 0.9500    |
| C(7)-C(8)   | 1.403(9)  | C(34)-C(35)       | 1.418(12) |
| C(7)-H(7)   | 0.9500    | C(34)-C(39)       | 1.422(10) |
| C(8)-C(9)   | 1.448(10) | C(35)-C(36)       | 1.381(13) |
| C(11)-C(12) | 1.403(13) | C(35)-H(35)       | 0.9500    |
| C(11)-H(11) | 0.9500    | C(36)-C(37)       | 1.402(11) |
| C(12)-C(13) | 1.376(13) | C(36)-H(36)       | 0.9500    |
| C(12)-H(12) | 0.9500    | C(37)-C(38)       | 1.404(10) |
| C(13)-C(14) | 1.413(11) | C(37)-H(37)       | 0.9500    |
| C(13)-H(13) | 0.9500    | C(38)-C(39)       | 1.446(10) |
| C(14)-C(15) | 1.397(12) |                   |           |
| C(14)-C(19) | 1.418(10) | N(22)-Zn(1)-N(2)  | 175.6(2)  |
| C(15)-C(16) | 1.373(11) | N(22)-Zn(1)-N(3)  | 102.2(2)  |
| C(15)-H(15) | 0.9500    | N(2)-Zn(1)-N(3)   | 76.7(2)   |
| C(16)-C(17) | 1.409(11) | N(22)-Zn(1)-N(21) | 77.1(2)   |
| C(16)-H(16) | 0.9500    | N(2)-Zn(1)-N(21)  | 107.1(2)  |
| C(17)-C(18) | 1.409(10) | N(3)-Zn(1)-N(21)  | 90.9(2)   |
| C(17)-H(17) | 0.9500    | N(22)-Zn(1)-N(23) | 77.6(2)   |
| C(18)-C(19) | 1.447(9)  | N(2)-Zn(1)-N(23)  | 98.1(2)   |
| C(21)-C(22) | 1.409(12) | N(3)-Zn(1)-N(23)  | 91.5(2)   |

|                   |          |                   |          |
|-------------------|----------|-------------------|----------|
| N(21)-Zn(1)-N(23) | 154.5(2) | C(5)-C(6)-C(7)    | 123.3(7) |
| N(22)-Zn(1)-N(1)  | 104.3(2) | C(5)-C(6)-H(6)    | 118.3    |
| N(2)-Zn(1)-N(1)   | 76.5(2)  | C(7)-C(6)-H(6)    | 118.3    |
| N(3)-Zn(1)-N(1)   | 153.1(2) | C(8)-C(7)-C(6)    | 120.6(6) |
| N(21)-Zn(1)-N(1)  | 98.9(2)  | C(8)-C(7)-H(7)    | 119.7    |
| N(23)-Zn(1)-N(1)  | 90.2(2)  | C(6)-C(7)-H(7)    | 119.7    |
| C(1)-N(1)-C(9)    | 119.4(6) | N(2)-C(8)-C(7)    | 128.7(6) |
| C(1)-N(1)-Zn(1)   | 127.3(5) | N(2)-C(8)-C(9)    | 114.9(6) |
| C(9)-N(1)-Zn(1)   | 113.3(4) | C(7)-C(8)-C(9)    | 116.4(6) |
| C(18)-N(2)-C(8)   | 125.9(6) | N(1)-C(9)-C(4)    | 121.4(6) |
| C(18)-N(2)-Zn(1)  | 116.3(4) | N(1)-C(9)-C(8)    | 117.1(6) |
| C(8)-N(2)-Zn(1)   | 117.5(5) | C(4)-C(9)-C(8)    | 121.5(6) |
| C(11)-N(3)-C(19)  | 119.7(7) | N(3)-C(11)-C(12)  | 122.3(7) |
| C(11)-N(3)-Zn(1)  | 127.0(5) | N(3)-C(11)-H(11)  | 118.9    |
| C(19)-N(3)-Zn(1)  | 113.0(4) | C(12)-C(11)-H(11) | 118.9    |
| C(21)-N(21)-C(29) | 119.4(7) | C(13)-C(12)-C(11) | 119.1(7) |
| C(21)-N(21)-Zn(1) | 127.9(5) | C(13)-C(12)-H(12) | 120.4    |
| C(29)-N(21)-Zn(1) | 112.7(5) | C(11)-C(12)-H(12) | 120.4    |
| C(28)-N(22)-C(38) | 125.7(6) | C(12)-C(13)-C(14) | 120.1(7) |
| C(28)-N(22)-Zn(1) | 117.7(5) | C(12)-C(13)-H(13) | 119.9    |
| C(38)-N(22)-Zn(1) | 116.3(5) | C(14)-C(13)-H(13) | 119.9    |
| C(31)-N(23)-C(39) | 120.7(6) | C(15)-C(14)-C(13) | 123.0(7) |
| C(31)-N(23)-Zn(1) | 127.1(5) | C(15)-C(14)-C(19) | 120.1(7) |
| C(39)-N(23)-Zn(1) | 112.1(4) | C(13)-C(14)-C(19) | 116.9(7) |
| N(1)-C(1)-C(2)    | 122.5(7) | C(16)-C(15)-C(14) | 119.2(7) |
| N(1)-C(1)-H(1)    | 118.8    | C(16)-C(15)-H(15) | 120.4    |
| C(2)-C(1)-H(1)    | 118.8    | C(14)-C(15)-H(15) | 120.4    |
| C(3)-C(2)-C(1)    | 118.8(7) | C(15)-C(16)-C(17) | 121.9(7) |
| C(3)-C(2)-H(2)    | 120.6    | C(15)-C(16)-H(16) | 119.1    |
| C(1)-C(2)-H(2)    | 120.6    | C(17)-C(16)-H(16) | 119.1    |
| C(2)-C(3)-C(4)    | 120.5(7) | C(18)-C(17)-C(16) | 121.6(6) |
| C(2)-C(3)-H(3)    | 119.7    | C(18)-C(17)-H(17) | 119.2    |
| C(4)-C(3)-H(3)    | 119.7    | C(16)-C(17)-H(17) | 119.2    |
| C(3)-C(4)-C(5)    | 124.2(6) | N(2)-C(18)-C(17)  | 129.1(6) |
| C(3)-C(4)-C(9)    | 117.2(7) | N(2)-C(18)-C(19)  | 115.1(6) |
| C(5)-C(4)-C(9)    | 118.5(7) | C(17)-C(18)-C(19) | 115.7(6) |
| C(6)-C(5)-C(4)    | 119.3(6) | N(3)-C(19)-C(14)  | 121.9(6) |
| C(6)-C(5)-H(5)    | 120.3    | N(3)-C(19)-C(18)  | 116.8(6) |
| C(4)-C(5)-H(5)    | 120.3    | C(14)-C(19)-C(18) | 121.3(7) |

|                   |          |                   |          |
|-------------------|----------|-------------------|----------|
| N(21)-C(21)-C(22) | 123.0(8) | N(23)-C(31)-C(32) | 122.4(7) |
| N(21)-C(21)-H(21) | 118.5    | N(23)-C(31)-H(31) | 118.8    |
| C(22)-C(21)-H(21) | 118.5    | C(32)-C(31)-H(31) | 118.8    |
| C(23)-C(22)-C(21) | 118.9(8) | C(33)-C(32)-C(31) | 117.9(7) |
| C(23)-C(22)-H(22) | 120.6    | C(33)-C(32)-H(32) | 121.1    |
| C(21)-C(22)-H(22) | 120.6    | C(31)-C(32)-H(32) | 121.1    |
| C(22)-C(23)-C(24) | 120.3(7) | C(32)-C(33)-C(34) | 121.4(7) |
| C(22)-C(23)-H(23) | 119.9    | C(32)-C(33)-H(33) | 119.3    |
| C(24)-C(23)-H(23) | 119.9    | C(34)-C(33)-H(33) | 119.3    |
| C(25)-C(24)-C(29) | 120.1(7) | C(33)-C(34)-C(35) | 123.2(7) |
| C(25)-C(24)-C(23) | 123.1(7) | C(33)-C(34)-C(39) | 117.0(7) |
| C(29)-C(24)-C(23) | 116.7(7) | C(35)-C(34)-C(39) | 119.7(7) |
| C(26)-C(25)-C(24) | 118.5(7) | C(36)-C(35)-C(34) | 118.4(7) |
| C(26)-C(25)-H(25) | 120.7    | C(36)-C(35)-H(35) | 120.8    |
| C(24)-C(25)-H(25) | 120.7    | C(34)-C(35)-H(35) | 120.8    |
| C(25)-C(26)-C(27) | 121.7(8) | C(35)-C(36)-C(37) | 122.1(7) |
| C(25)-C(26)-H(26) | 119.2    | C(35)-C(36)-H(36) | 118.9    |
| C(27)-C(26)-H(26) | 119.2    | C(37)-C(36)-H(36) | 118.9    |
| C(28)-C(27)-C(26) | 122.6(8) | C(36)-C(37)-C(38) | 122.1(7) |
| C(28)-C(27)-H(27) | 118.7    | C(36)-C(37)-H(37) | 118.9    |
| C(26)-C(27)-H(27) | 118.7    | C(38)-C(37)-H(37) | 118.9    |
| N(22)-C(28)-C(27) | 129.6(7) | N(22)-C(38)-C(37) | 129.1(6) |
| N(22)-C(28)-C(29) | 114.9(6) | N(22)-C(38)-C(39) | 115.1(6) |
| C(27)-C(28)-C(29) | 115.4(7) | C(37)-C(38)-C(39) | 115.6(6) |
| N(21)-C(29)-C(24) | 121.8(7) | N(23)-C(39)-C(34) | 120.5(7) |
| N(21)-C(29)-C(28) | 117.1(6) | N(23)-C(39)-C(38) | 117.9(6) |
| C(24)-C(29)-C(28) | 121.2(7) | C(34)-C(39)-C(38) | 121.5(6) |

**Table S12.** Anisotropic displacement parameters ( $\text{\AA}^2 \times 10^3$ ) for vacuum grown  $[\text{Zn}(\text{BQA})_2]$ .

The anisotropic displacement factor exponent takes the form:

$$-2p^2 [ h^2 a^* 2U^{11} + \dots + 2 h k a^* b^* U^{12} ]$$

|       | $U^{11}$ | $U^{22}$ | $U^{33}$ | $U^{23}$ | $U^{13}$ | $U^{12}$ |
|-------|----------|----------|----------|----------|----------|----------|
| Zn(1) | 27(1)    | 13(1)    | 21(1)    | 1(1)     | 11(1)    | 0(1)     |

|       |       |       |       |        |       |        |
|-------|-------|-------|-------|--------|-------|--------|
| N(1)  | 24(3) | 18(3) | 20(3) | -4(2)  | 9(2)  | -1(2)  |
| N(2)  | 26(3) | 16(3) | 23(3) | 4(2)   | 11(2) | 1(2)   |
| N(3)  | 27(3) | 14(3) | 23(3) | 1(2)   | 9(2)  | 5(2)   |
| N(21) | 27(3) | 17(3) | 26(3) | -3(2)  | 12(2) | 0(2)   |
| N(22) | 28(3) | 15(2) | 24(3) | 3(2)   | 11(2) | 0(2)   |
| N(23) | 24(3) | 12(2) | 23(3) | 1(2)   | 8(2)  | 0(2)   |
| C(1)  | 30(4) | 21(3) | 29(3) | -5(3)  | 13(3) | -3(3)  |
| C(2)  | 25(3) | 25(4) | 42(4) | -8(3)  | 16(3) | -4(3)  |
| C(3)  | 25(3) | 25(3) | 28(3) | -9(3)  | 7(3)  | 4(3)   |
| C(4)  | 28(3) | 16(3) | 22(3) | -6(2)  | 7(3)  | 3(2)   |
| C(5)  | 36(4) | 16(3) | 23(3) | -2(2)  | 9(3)  | 10(3)  |
| C(6)  | 39(4) | 8(3)  | 30(4) | 2(2)   | 13(3) | 2(3)   |
| C(7)  | 22(3) | 15(3) | 28(3) | 3(2)   | 11(3) | 5(2)   |
| C(8)  | 24(3) | 14(3) | 21(3) | -1(2)  | 8(2)  | 0(2)   |
| C(9)  | 27(3) | 11(3) | 18(3) | -2(2)  | 6(2)  | -1(2)  |
| C(11) | 40(4) | 20(3) | 21(3) | 7(3)   | 8(3)  | 6(3)   |
| C(12) | 43(5) | 28(4) | 26(4) | 7(3)   | 6(3)  | 14(3)  |
| C(13) | 30(4) | 30(4) | 26(4) | -1(3)  | 6(3)  | 9(3)   |
| C(14) | 27(3) | 24(3) | 24(3) | -3(3)  | 9(3)  | 5(3)   |
| C(15) | 24(3) | 29(4) | 34(4) | -4(3)  | 13(3) | 3(3)   |
| C(16) | 37(4) | 27(4) | 30(4) | 5(3)   | 22(3) | 3(3)   |
| C(17) | 26(3) | 22(3) | 26(3) | 6(2)   | 13(3) | 3(3)   |
| C(18) | 23(3) | 13(3) | 24(3) | 0(2)   | 9(3)  | -2(2)  |
| C(19) | 25(3) | 18(3) | 20(3) | -1(2)  | 4(3)  | 0(2)   |
| C(21) | 31(4) | 26(4) | 40(4) | -5(3)  | 19(3) | -3(3)  |
| C(22) | 27(4) | 40(4) | 43(5) | -18(4) | 14(3) | -10(3) |
| C(23) | 28(4) | 41(4) | 28(4) | -16(3) | 8(3)  | -2(3)  |
| C(24) | 28(3) | 26(4) | 25(4) | -5(3)  | 7(3)  | 10(3)  |
| C(25) | 47(5) | 32(4) | 20(3) | 2(3)   | 12(3) | 11(3)  |
| C(26) | 64(6) | 24(4) | 28(4) | 2(3)   | 27(4) | 4(3)   |
| C(27) | 41(4) | 21(3) | 29(4) | 1(3)   | 19(3) | 2(3)   |
| C(28) | 26(3) | 16(3) | 22(3) | 0(2)   | 9(3)  | 3(2)   |
| C(29) | 27(3) | 19(3) | 21(3) | 1(2)   | 7(3)  | 5(3)   |
| C(31) | 32(4) | 18(3) | 26(3) | 2(3)   | 11(3) | 4(3)   |
| C(32) | 38(4) | 23(3) | 22(3) | -3(3)  | 9(3)  | 5(3)   |
| C(33) | 34(4) | 23(3) | 28(4) | -8(3)  | 10(3) | -2(3)  |
| C(34) | 28(3) | 22(3) | 31(4) | -4(3)  | 13(3) | -2(3)  |
| C(35) | 53(5) | 27(4) | 33(4) | -8(3)  | 17(4) | -10(4) |
| C(36) | 58(5) | 22(4) | 37(4) | 1(3)   | 23(4) | -11(3) |

|       |       |       |       |      |       |       |
|-------|-------|-------|-------|------|-------|-------|
| C(37) | 44(4) | 16(3) | 27(3) | 0(3) | 15(3) | -5(3) |
| C(38) | 23(3) | 15(3) | 25(3) | 0(2) | 10(3) | 0(2)  |
| C(39) | 21(3) | 16(3) | 29(3) | 0(2) | 10(3) | 1(2)  |

---

**Table S13.** Hydrogen coordinates ( $\times 10^4$ ) and isotropic displacement parameters ( $\text{\AA}^2 \times 10^3$ ) for vacuum grown  $[\text{Zn}(\text{BQA})_2]$ .

|       | x    | y    | z    | U(eq) |
|-------|------|------|------|-------|
| H(1)  | 4940 | 5999 | 6919 | 31    |
| H(2)  | 3952 | 7145 | 6468 | 36    |
| H(3)  | 4100 | 8505 | 5894 | 33    |
| H(5)  | 4965 | 9541 | 5539 | 31    |
| H(6)  | 6125 | 9720 | 5540 | 31    |
| H(7)  | 7043 | 8487 | 5926 | 26    |
| H(11) | 7924 | 4108 | 7744 | 35    |
| H(12) | 9030 | 3553 | 7686 | 42    |
| H(13) | 9456 | 4325 | 6976 | 37    |
| H(15) | 9224 | 5576 | 6082 | 34    |
| H(16) | 8482 | 6838 | 5447 | 35    |
| H(17) | 7429 | 7406 | 5584 | 29    |
| H(21) | 7621 | 7404 | 7961 | 37    |
| H(22) | 8071 | 7842 | 9059 | 44    |
| H(23) | 7814 | 6819 | 9774 | 40    |
| H(25) | 7148 | 5279 | 9947 | 40    |
| H(26) | 6287 | 4019 | 9465 | 43    |
| H(27) | 5856 | 3684 | 8361 | 34    |
| H(31) | 6075 | 5283 | 5481 | 31    |
| H(32) | 5464 | 4028 | 4723 | 34    |
| H(33) | 5119 | 2581 | 5087 | 35    |
| H(35) | 5193 | 1492 | 6032 | 45    |
| H(36) | 5590 | 1348 | 7149 | 45    |
| H(37) | 6056 | 2699 | 7834 | 34    |

---



## [Mn(BQA)<sub>2</sub>]

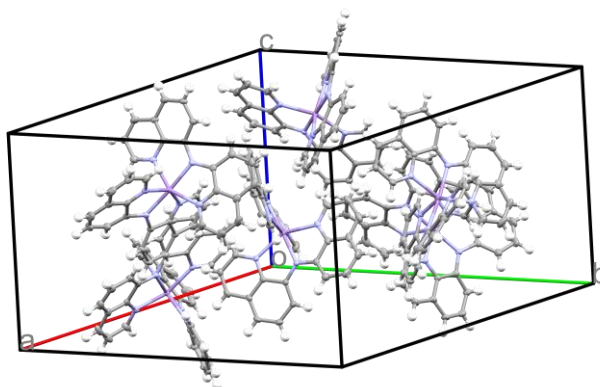

**Fig. S23** Unit cell with complete molecules of Mn(BQA)<sub>2</sub>

The unit cell of [Mn(BQA)<sub>2</sub>] was determined using 9975 reflections and the structure was solved in the hexagonal space group *P6<sub>5</sub>*. The asymmetric unit contains one molecule of [Mn(BQA)<sub>2</sub>] as well as heavily disordered solvent molecules. SQUEEZE as implemented in Platon was used to include a model for the disordered solvent in the refinement. One independent void at 0.0 0.0 0.0 with a volume of 1156 Å<sup>3</sup> was found in the unit cell. The equivalent of 278 electrons were found in the void which corresponds to 6 to 7 molecules of the used solvents (thf and hexane). The obtained model was added as .fab-file to the refinement using SHELXL.

**Table S14.** Crystal data and structure refinement for [Mn(BQA)<sub>2</sub>].

|                                 |                                                   |           |
|---------------------------------|---------------------------------------------------|-----------|
| CCDC No.                        | 1897890                                           |           |
| Empirical formula               | C <sub>36</sub> H <sub>24</sub> Mn N <sub>6</sub> |           |
| Formula weight                  | 595.55                                            |           |
| Temperature                     | 100(2) K                                          |           |
| Wavelength                      | 0.71073 Å                                         |           |
| Crystal system                  | Hexagonal                                         |           |
| Space group                     | <i>P6<sub>5</sub></i>                             |           |
| Unit cell dimensions            | a = 20.5446(5) Å                                  | α = 90°.  |
|                                 | b = 20.5446(5) Å                                  | β = 90°.  |
|                                 | c = 13.8346(4) Å                                  | γ = 120°. |
| Volume                          | 5057.0(3) Å <sup>3</sup>                          |           |
| Z                               | 6                                                 |           |
| Density (calculated)            | 1.173 Mg/m <sup>3</sup>                           |           |
| Absorption coefficient          | 0.423 mm <sup>-1</sup>                            |           |
| <i>F</i> (000)                  | 1842                                              |           |
| Crystal size                    | 0.420 x 0.038 x 0.034 mm <sup>3</sup>             |           |
| Theta range for data collection | 2.289 to 29.127°.                                 |           |
| Index ranges                    | -28 ≤ h ≤ 28, -28 ≤ k ≤ 28, -18 ≤ l ≤ 18          |           |

|                                 |                                    |
|---------------------------------|------------------------------------|
| Reflections collected           | 396141                             |
| Independent reflections         | 9056 [R(int) = 0.1489]             |
| Completeness to theta = 25.242° | 99.8 %                             |
| Absorption correction           | Semi-empirical from equivalents    |
| Refinement method               | Full-matrix least-squares on $F^2$ |
| Data / restraints / parameters  | 9056 / 1 / 388                     |
| Goodness-of-fit on $F^2$        | 1.029                              |
| Final R indices [I>2σ(I)]       | R1 = 0.0330, wR2 = 0.0638          |
| R indices (all data)            | R1 = 0.0414, wR2 = 0.0665          |
| Absolute structure parameter    | 0.012(5)                           |
| Largest diff. peak and hole     | 0.198 and -0.250 e.Å <sup>-3</sup> |

**Table S15.** Atomic coordinates (  $\times 10^4$ ) and equivalent isotropic displacement parameters ( $\text{Å}^2 \times 10^3$ ) for [Mn(BQA)<sub>2</sub>]. U(eq) is defined as one third of the trace of the orthogonalized U<sup>ij</sup> tensor.

|       | x       | y       | z       | U(eq) |
|-------|---------|---------|---------|-------|
| Mn(1) | 5082(1) | 739(1)  | 783(1)  | 17(1) |
| N(1)  | 5903(1) | 391(1)  | 314(1)  | 21(1) |
| N(2)  | 5903(1) | 1076(1) | 1948(1) | 19(1) |
| N(3)  | 4740(1) | 1308(1) | 1885(1) | 19(1) |
| N(21) | 5568(1) | 1722(1) | -250(1) | 17(1) |
| N(22) | 4241(1) | 481(1)  | -323(1) | 18(1) |
| N(23) | 4101(1) | -381(1) | 1195(1) | 20(1) |
| C(1)  | 5880(1) | 57(1)   | -515(2) | 29(1) |
| C(2)  | 6451(1) | -83(1)  | -811(2) | 36(1) |
| C(3)  | 7052(2) | 127(1)  | -220(2) | 35(1) |
| C(4)  | 7111(1) | 495(1)  | 659(2)  | 27(1) |
| C(5)  | 6512(1) | 622(1)  | 908(2)  | 21(1) |
| C(6)  | 6528(1) | 1013(1) | 1782(2) | 20(1) |
| C(7)  | 7194(1) | 1309(1) | 2326(2) | 26(1) |
| C(8)  | 7783(1) | 1180(2) | 2064(2) | 31(1) |
| C(9)  | 7747(2) | 773(2)  | 1270(2) | 33(1) |
| C(10) | 5746(1) | 1321(1) | 2790(2) | 17(1) |
| C(11) | 6064(1) | 1401(1) | 3710(2) | 21(1) |
| C(12) | 5843(1) | 1673(1) | 4501(2) | 23(1) |

|       |         |          |          |       |
|-------|---------|----------|----------|-------|
| C(13) | 5308(1) | 1886(1)  | 4419(2)  | 24(1) |
| C(14) | 4943(1) | 1784(1)  | 3528(2)  | 20(1) |
| C(15) | 5135(1) | 1478(1)  | 2733(2)  | 18(1) |
| C(16) | 4360(1) | 1957(1)  | 3384(2)  | 26(1) |
| C(17) | 3983(1) | 1793(1)  | 2530(2)  | 27(1) |
| C(18) | 4179(1) | 1444(1)  | 1796(2)  | 25(1) |
| C(21) | 6223(1) | 2346(1)  | -158(2)  | 21(1) |
| C(22) | 6531(1) | 2899(1)  | -882(2)  | 23(1) |
| C(23) | 6148(1) | 2775(1)  | -1729(2) | 23(1) |
| C(24) | 5453(1) | 2106(1)  | -1871(2) | 20(1) |
| C(25) | 5174(1) | 1596(1)  | -1084(2) | 17(1) |
| C(26) | 5055(1) | 1924(1)  | -2747(2) | 25(1) |
| C(27) | 4407(1) | 1244(1)  | -2836(2) | 25(1) |
| C(28) | 4108(1) | 739(1)   | -2060(2) | 22(1) |
| C(29) | 4454(1) | 902(1)   | -1148(2) | 18(1) |
| C(30) | 3529(1) | -113(1)  | -154(2)  | 20(1) |
| C(31) | 2863(1) | -286(1)  | -619(2)  | 29(1) |
| C(32) | 2179(1) | -937(2)  | -372(2)  | 37(1) |
| C(33) | 2132(2) | -1421(2) | 334(2)   | 39(1) |
| C(34) | 2775(1) | -1248(1) | 876(2)   | 29(1) |
| C(35) | 3470(1) | -585(1)  | 655(2)   | 22(1) |
| C(36) | 2775(2) | -1684(1) | 1655(2)  | 35(1) |
| C(37) | 3408(2) | -1464(1) | 2197(2)  | 37(1) |
| C(38) | 4065(2) | -800(1)  | 1941(2)  | 28(1) |

---

**Table S16.** Bond lengths [ $\text{\AA}$ ] and angles [ $^\circ$ ] for  $[\text{Mn}(\text{BQA})_2]$ .

|             |            |             |          |
|-------------|------------|-------------|----------|
| Mn(1)-N(22) | 2.1663(19) | N(2)-C(6)   | 1.372(3) |
| Mn(1)-N(2)  | 2.1806(19) | N(3)-C(18)  | 1.320(3) |
| Mn(1)-N(1)  | 2.2321(19) | N(3)-C(15)  | 1.370(3) |
| Mn(1)-N(3)  | 2.2366(19) | N(21)-C(21) | 1.321(3) |
| Mn(1)-N(23) | 2.2454(18) | N(21)-C(25) | 1.357(3) |
| Mn(1)-N(21) | 2.2589(18) | N(22)-C(29) | 1.366(3) |
| N(1)-C(1)   | 1.325(3)   | N(22)-C(30) | 1.378(3) |
| N(1)-C(5)   | 1.369(3)   | N(23)-C(38) | 1.323(3) |
| N(2)-C(10)  | 1.369(3)   | N(23)-C(35) | 1.368(3) |

|             |          |                   |            |
|-------------|----------|-------------------|------------|
| C(1)-C(2)   | 1.400(4) | C(26)-C(27)       | 1.370(3)   |
| C(1)-H(1)   | 0.9500   | C(26)-H(26)       | 0.9500     |
| C(2)-C(3)   | 1.358(4) | C(27)-C(28)       | 1.403(3)   |
| C(2)-H(2)   | 0.9500   | C(27)-H(27)       | 0.9500     |
| C(3)-C(4)   | 1.404(4) | C(28)-C(29)       | 1.404(3)   |
| C(3)-H(3)   | 0.9500   | C(28)-H(28)       | 0.9500     |
| C(4)-C(9)   | 1.414(4) | C(30)-C(31)       | 1.387(3)   |
| C(4)-C(5)   | 1.422(3) | C(30)-C(35)       | 1.445(3)   |
| C(5)-C(6)   | 1.443(3) | C(31)-C(32)       | 1.413(4)   |
| C(6)-C(7)   | 1.407(3) | C(31)-H(31)       | 0.9500     |
| C(7)-C(8)   | 1.409(3) | C(32)-C(33)       | 1.363(4)   |
| C(7)-H(7)   | 0.9500   | C(32)-H(32)       | 0.9500     |
| C(8)-C(9)   | 1.360(4) | C(33)-C(34)       | 1.402(4)   |
| C(8)-H(8)   | 0.9500   | C(33)-H(33)       | 0.9500     |
| C(9)-H(9)   | 0.9500   | C(34)-C(36)       | 1.401(4)   |
| C(10)-C(11) | 1.403(3) | C(34)-C(35)       | 1.429(3)   |
| C(10)-C(15) | 1.445(3) | C(36)-C(37)       | 1.368(4)   |
| C(11)-C(12) | 1.404(3) | C(36)-H(36)       | 0.9500     |
| C(11)-H(11) | 0.9500   | C(37)-C(38)       | 1.402(4)   |
| C(12)-C(13) | 1.375(3) | C(37)-H(37)       | 0.9500     |
| C(12)-H(12) | 0.9500   | C(38)-H(38)       | 0.9500     |
| C(13)-C(14) | 1.404(3) |                   |            |
| C(13)-H(13) | 0.9500   | N(22)-Mn(1)-N(2)  | 174.66(7)  |
| C(14)-C(15) | 1.417(3) | N(22)-Mn(1)-N(1)  | 110.72(7)  |
| C(14)-C(16) | 1.423(3) | N(2)-Mn(1)-N(1)   | 74.24(7)   |
| C(16)-C(17) | 1.359(3) | N(22)-Mn(1)-N(3)  | 100.89(7)  |
| C(16)-H(16) | 0.9500   | N(2)-Mn(1)-N(3)   | 74.08(7)   |
| C(17)-C(18) | 1.412(3) | N(1)-Mn(1)-N(3)   | 148.27(7)  |
| C(17)-H(17) | 0.9500   | N(22)-Mn(1)-N(23) | 74.38(7)   |
| C(18)-H(18) | 0.9500   | N(2)-Mn(1)-N(23)  | 107.06(7)  |
| C(21)-C(22) | 1.406(3) | N(1)-Mn(1)-N(23)  | 100.40(7)  |
| C(21)-H(21) | 0.9500   | N(3)-Mn(1)-N(23)  | 90.41(7)   |
| C(22)-C(23) | 1.363(3) | N(22)-Mn(1)-N(21) | 73.39(7)   |
| C(22)-H(22) | 0.9500   | N(2)-Mn(1)-N(21)  | 104.93(7)  |
| C(23)-C(24) | 1.415(3) | N(1)-Mn(1)-N(21)  | 91.98(7)   |
| C(23)-H(23) | 0.9500   | N(3)-Mn(1)-N(21)  | 94.49(6)   |
| C(24)-C(26) | 1.404(3) | N(23)-Mn(1)-N(21) | 147.75(7)  |
| C(24)-C(25) | 1.418(3) | C(1)-N(1)-C(5)    | 119.2(2)   |
| C(25)-C(29) | 1.457(3) | C(1)-N(1)-Mn(1)   | 125.53(17) |

|                   |            |                   |            |
|-------------------|------------|-------------------|------------|
| C(5)-N(1)-Mn(1)   | 114.90(15) | C(7)-C(8)-H(8)    | 118.8      |
| C(10)-N(2)-C(6)   | 125.46(19) | C(8)-C(9)-C(4)    | 119.2(2)   |
| C(10)-N(2)-Mn(1)  | 117.29(14) | C(8)-C(9)-H(9)    | 120.4      |
| C(6)-N(2)-Mn(1)   | 117.24(15) | C(4)-C(9)-H(9)    | 120.4      |
| C(18)-N(3)-C(15)  | 119.7(2)   | N(2)-C(10)-C(11)  | 129.3(2)   |
| C(18)-N(3)-Mn(1)  | 125.64(16) | N(2)-C(10)-C(15)  | 115.21(18) |
| C(15)-N(3)-Mn(1)  | 114.55(14) | C(11)-C(10)-C(15) | 115.40(19) |
| C(21)-N(21)-C(25) | 119.20(19) | C(10)-C(11)-C(12) | 121.9(2)   |
| C(21)-N(21)-Mn(1) | 125.94(15) | C(10)-C(11)-H(11) | 119.0      |
| C(25)-N(21)-Mn(1) | 114.36(14) | C(12)-C(11)-H(11) | 119.0      |
| C(29)-N(22)-C(30) | 124.42(19) | C(13)-C(12)-C(11) | 122.2(2)   |
| C(29)-N(22)-Mn(1) | 118.14(14) | C(13)-C(12)-H(12) | 118.9      |
| C(30)-N(22)-Mn(1) | 117.43(15) | C(11)-C(12)-H(12) | 118.9      |
| C(38)-N(23)-C(35) | 119.4(2)   | C(12)-C(13)-C(14) | 118.5(2)   |
| C(38)-N(23)-Mn(1) | 126.47(17) | C(12)-C(13)-H(13) | 120.7      |
| C(35)-N(23)-Mn(1) | 113.79(14) | C(14)-C(13)-H(13) | 120.7      |
| N(1)-C(1)-C(2)    | 122.9(3)   | C(13)-C(14)-C(15) | 120.0(2)   |
| N(1)-C(1)-H(1)    | 118.6      | C(13)-C(14)-C(16) | 122.6(2)   |
| C(2)-C(1)-H(1)    | 118.6      | C(15)-C(14)-C(16) | 117.3(2)   |
| C(3)-C(2)-C(1)    | 118.7(2)   | N(3)-C(15)-C(14)  | 121.0(2)   |
| C(3)-C(2)-H(2)    | 120.6      | N(3)-C(15)-C(10)  | 117.40(19) |
| C(1)-C(2)-H(2)    | 120.6      | C(14)-C(15)-C(10) | 121.6(2)   |
| C(2)-C(3)-C(4)    | 120.8(2)   | C(17)-C(16)-C(14) | 120.3(2)   |
| C(2)-C(3)-H(3)    | 119.6      | C(17)-C(16)-H(16) | 119.8      |
| C(4)-C(3)-H(3)    | 119.6      | C(14)-C(16)-H(16) | 119.8      |
| C(3)-C(4)-C(9)    | 123.3(2)   | C(16)-C(17)-C(18) | 118.7(2)   |
| C(3)-C(4)-C(5)    | 117.3(2)   | C(16)-C(17)-H(17) | 120.7      |
| C(9)-C(4)-C(5)    | 119.3(2)   | C(18)-C(17)-H(17) | 120.7      |
| N(1)-C(5)-C(4)    | 121.1(2)   | N(3)-C(18)-C(17)  | 122.7(2)   |
| N(1)-C(5)-C(6)    | 117.2(2)   | N(3)-C(18)-H(18)  | 118.6      |
| C(4)-C(5)-C(6)    | 121.7(2)   | C(17)-C(18)-H(18) | 118.6      |
| N(2)-C(6)-C(7)    | 128.6(2)   | N(21)-C(21)-C(22) | 122.9(2)   |
| N(2)-C(6)-C(5)    | 115.6(2)   | N(21)-C(21)-H(21) | 118.5      |
| C(7)-C(6)-C(5)    | 115.7(2)   | C(22)-C(21)-H(21) | 118.5      |
| C(6)-C(7)-C(8)    | 121.5(2)   | C(23)-C(22)-C(21) | 118.5(2)   |
| C(6)-C(7)-H(7)    | 119.2      | C(23)-C(22)-H(22) | 120.7      |
| C(8)-C(7)-H(7)    | 119.2      | C(21)-C(22)-H(22) | 120.7      |
| C(9)-C(8)-C(7)    | 122.4(2)   | C(22)-C(23)-C(24) | 120.6(2)   |
| C(9)-C(8)-H(8)    | 118.8      | C(22)-C(23)-H(23) | 119.7      |

|                   |            |                   |            |
|-------------------|------------|-------------------|------------|
| C(24)-C(23)-H(23) | 119.7      | C(30)-C(31)-H(31) | 119.4      |
| C(26)-C(24)-C(23) | 123.3(2)   | C(32)-C(31)-H(31) | 119.4      |
| C(26)-C(24)-C(25) | 120.0(2)   | C(33)-C(32)-C(31) | 122.5(3)   |
| C(23)-C(24)-C(25) | 116.7(2)   | C(33)-C(32)-H(32) | 118.8      |
| N(21)-C(25)-C(24) | 122.01(19) | C(31)-C(32)-H(32) | 118.8      |
| N(21)-C(25)-C(29) | 117.12(18) | C(32)-C(33)-C(34) | 118.9(2)   |
| C(24)-C(25)-C(29) | 120.86(19) | C(32)-C(33)-H(33) | 120.5      |
| C(27)-C(26)-C(24) | 119.3(2)   | C(34)-C(33)-H(33) | 120.5      |
| C(27)-C(26)-H(26) | 120.4      | C(36)-C(34)-C(33) | 123.4(2)   |
| C(24)-C(26)-H(26) | 120.4      | C(36)-C(34)-C(35) | 117.1(2)   |
| C(26)-C(27)-C(28) | 121.9(2)   | C(33)-C(34)-C(35) | 119.5(2)   |
| C(26)-C(27)-H(27) | 119.1      | N(23)-C(35)-C(34) | 121.2(2)   |
| C(28)-C(27)-H(27) | 119.1      | N(23)-C(35)-C(30) | 117.92(19) |
| C(27)-C(28)-C(29) | 121.9(2)   | C(34)-C(35)-C(30) | 120.9(2)   |
| C(27)-C(28)-H(28) | 119.1      | C(37)-C(36)-C(34) | 120.9(2)   |
| C(29)-C(28)-H(28) | 119.1      | C(37)-C(36)-H(36) | 119.5      |
| N(22)-C(29)-C(28) | 129.5(2)   | C(34)-C(36)-H(36) | 119.5      |
| N(22)-C(29)-C(25) | 114.58(18) | C(36)-C(37)-C(38) | 118.5(2)   |
| C(28)-C(29)-C(25) | 115.77(19) | C(36)-C(37)-H(37) | 120.7      |
| N(22)-C(30)-C(31) | 128.5(2)   | C(38)-C(37)-H(37) | 120.7      |
| N(22)-C(30)-C(35) | 114.9(2)   | N(23)-C(38)-C(37) | 122.9(3)   |
| C(31)-C(30)-C(35) | 116.4(2)   | N(23)-C(38)-H(38) | 118.5      |
| C(30)-C(31)-C(32) | 121.2(2)   | C(37)-C(38)-H(38) | 118.5      |

**Table S17.** Anisotropic displacement parameters ( $\text{\AA}^2 \times 10^3$ ) for  $[\text{Mn}(\text{BQA})_2]$ . The anisotropic displacement factor exponent takes the form:

$$-2h^2 [ h^2 a^*2U^{11} + \dots + 2 h k a^* b^* U^{12} ]$$

|       | $U^{11}$ | $U^{22}$ | $U^{33}$ | $U^{23}$ | $U^{13}$ | $U^{12}$ |
|-------|----------|----------|----------|----------|----------|----------|
| Mn(1) | 21(1)    | 17(1)    | 13(1)    | 0(1)     | -1(1)    | 9(1)     |
| N(1)  | 24(1)    | 15(1)    | 22(1)    | 0(1)     | 2(1)     | 7(1)     |
| N(2)  | 21(1)    | 20(1)    | 14(1)    | 2(1)     | 0(1)     | 10(1)    |
| N(3)  | 25(1)    | 18(1)    | 16(1)    | 2(1)     | 0(1)     | 12(1)    |
| N(21) | 22(1)    | 16(1)    | 14(1)    | -3(1)    | -1(1)    | 9(1)     |
| N(22) | 20(1)    | 17(1)    | 15(1)    | 0(1)     | 0(1)     | 7(1)     |

|       |       |       |       |        |       |       |
|-------|-------|-------|-------|--------|-------|-------|
| N(23) | 26(1) | 17(1) | 17(1) | 1(1)   | 4(1)  | 11(1) |
| C(1)  | 28(1) | 20(1) | 31(1) | -7(1)  | 4(1)  | 6(1)  |
| C(2)  | 32(1) | 25(1) | 42(2) | -13(1) | 9(1)  | 8(1)  |
| C(3)  | 31(1) | 22(1) | 50(2) | -4(1)  | 13(1) | 13(1) |
| C(4)  | 29(1) | 20(1) | 32(1) | 6(1)   | 6(1)  | 13(1) |
| C(5)  | 23(1) | 14(1) | 24(1) | 4(1)   | 2(1)  | 8(1)  |
| C(6)  | 21(1) | 16(1) | 21(1) | 6(1)   | 3(1)  | 8(1)  |
| C(7)  | 24(1) | 28(1) | 23(1) | 5(1)   | 2(1)  | 11(1) |
| C(8)  | 20(1) | 38(1) | 33(1) | 8(1)   | 0(1)  | 14(1) |
| C(9)  | 28(1) | 36(1) | 42(2) | 10(1)  | 8(1)  | 20(1) |
| C(10) | 21(1) | 11(1) | 16(1) | 2(1)   | -1(1) | 5(1)  |
| C(11) | 24(1) | 20(1) | 16(1) | 2(1)   | -2(1) | 9(1)  |
| C(12) | 29(1) | 22(1) | 13(1) | 0(1)   | -2(1) | 8(1)  |
| C(13) | 29(1) | 20(1) | 19(1) | -1(1)  | 3(1)  | 10(1) |
| C(14) | 26(1) | 15(1) | 16(1) | 3(1)   | 4(1)  | 9(1)  |
| C(15) | 26(1) | 13(1) | 14(1) | 3(1)   | 1(1)  | 7(1)  |
| C(16) | 37(1) | 24(1) | 22(1) | -1(1)  | 4(1)  | 19(1) |
| C(17) | 38(1) | 30(1) | 24(1) | 1(1)   | 0(1)  | 24(1) |
| C(18) | 34(1) | 28(1) | 20(1) | 2(1)   | -3(1) | 19(1) |
| C(21) | 21(1) | 19(1) | 19(1) | -2(1)  | -2(1) | 9(1)  |
| C(22) | 21(1) | 16(1) | 28(1) | 1(1)   | 2(1)  | 6(1)  |
| C(23) | 28(1) | 18(1) | 25(1) | 6(1)   | 6(1)  | 13(1) |
| C(24) | 26(1) | 16(1) | 18(1) | 3(1)   | 4(1)  | 12(1) |
| C(25) | 22(1) | 16(1) | 15(1) | -1(1)  | 1(1)  | 11(1) |
| C(26) | 35(1) | 25(1) | 16(1) | 6(1)   | 2(1)  | 16(1) |
| C(27) | 33(1) | 29(1) | 15(1) | -2(1)  | -4(1) | 16(1) |
| C(28) | 26(1) | 20(1) | 18(1) | -4(1)  | -4(1) | 10(1) |
| C(29) | 22(1) | 15(1) | 18(1) | -2(1)  | 0(1)  | 10(1) |
| C(30) | 22(1) | 17(1) | 19(1) | -3(1)  | 2(1)  | 8(1)  |
| C(31) | 25(1) | 32(1) | 24(1) | 0(1)   | 0(1)  | 10(1) |
| C(32) | 20(1) | 43(2) | 32(1) | -6(1)  | -3(1) | 3(1)  |
| C(33) | 25(1) | 30(1) | 40(2) | -3(1)  | 7(1)  | -2(1) |
| C(34) | 32(1) | 20(1) | 27(1) | -1(1)  | 10(1) | 6(1)  |
| C(35) | 23(1) | 18(1) | 22(1) | -1(1)  | 7(1)  | 9(1)  |
| C(36) | 41(2) | 23(1) | 37(2) | 8(1)   | 19(1) | 13(1) |
| C(37) | 48(2) | 31(1) | 37(2) | 17(1)  | 20(1) | 25(1) |
| C(38) | 36(1) | 30(1) | 24(1) | 9(1)   | 10(1) | 22(1) |

**Table S18.** Hydrogen coordinates ( $\times 10^4$ ) and isotropic displacement parameters ( $\text{\AA}^2 \times 10^3$ ) for  $[\text{Mn}(\text{BQA})_2]$ .

|       | x    | y     | z     | U(eq) |
|-------|------|-------|-------|-------|
| H(1)  | 5458 | -94   | -927  | 35    |
| H(2)  | 6418 | -320  | -1413 | 44    |
| H(3)  | 7437 | 24    | -404  | 42    |
| H(7)  | 7249 | 1604  | 2882  | 31    |
| H(8)  | 8220 | 1383  | 2457  | 37    |
| H(9)  | 8144 | 677   | 1127  | 40    |
| H(11) | 6441 | 1266  | 3801  | 25    |
| H(12) | 6070 | 1712  | 5112  | 28    |
| H(13) | 5189 | 2097  | 4954  | 28    |
| H(16) | 4234 | 2189  | 3887  | 31    |
| H(17) | 3596 | 1910  | 2429  | 33    |
| H(18) | 3896 | 1302  | 1214  | 31    |
| H(21) | 6499 | 2424  | 424   | 25    |
| H(22) | 6995 | 3349  | -783  | 27    |
| H(23) | 6348 | 3141  | -2228 | 28    |
| H(26) | 5232 | 2268  | -3271 | 30    |
| H(27) | 4153 | 1112  | -3440 | 30    |
| H(28) | 3658 | 273   | -2154 | 26    |
| H(31) | 2867 | 37    | -1112 | 35    |
| H(32) | 1735 | -1040 | -711  | 45    |
| H(33) | 1670 | -1869 | 457   | 46    |
| H(36) | 2328 | -2139 | 1808  | 42    |
| H(37) | 3402 | -1754 | 2734  | 44    |
| H(38) | 4503 | -644  | 2321  | 33    |



## [Cr(BQA)<sub>2</sub>]

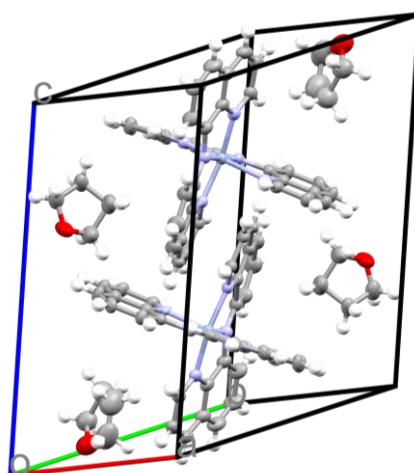

**Fig. S24** Unit cell with complete molecules of Cr(BQA)<sub>2</sub>

The unit cell of [Cr(BQA)<sub>2</sub>] was determined using 9872 reflections and the structure was solved in the triclinic space group  $P\bar{1}$ . The asymmetric unit contains one molecule of [Cr(BQA)<sub>2</sub>] and two solvent molecules. One of the ligands and both solvent molecules were found to be disordered. The disorder was refined with the help of same distance restraints and similarity restraints on the anisotropic displacement parameters of the solvent atoms. Disordered atoms with very similar coordinates were set to the same anisotropic displacement parameters. The disorder ratios were allowed to refine freely and converged to 0.54(2) (ligand), 0.508(7) and 0.545(9) (solvent molecules).

**Table S29.** Crystal data and structure refinement for [Cr(BQA)<sub>2</sub>].

|                                 |                                                                  |                                                                           |
|---------------------------------|------------------------------------------------------------------|---------------------------------------------------------------------------|
| CCDC No                         | 2057276                                                          |                                                                           |
| Empirical formula               | C <sub>44</sub> H <sub>40</sub> Cr N <sub>6</sub> O <sub>2</sub> |                                                                           |
| Formula weight                  | 736.82                                                           |                                                                           |
| Temperature                     | 100(2) K                                                         |                                                                           |
| Wavelength                      | 1.54178 Å                                                        |                                                                           |
| Crystal system                  | Triclinic                                                        |                                                                           |
| Space group                     | $P\bar{1}$                                                       |                                                                           |
| Unit cell dimensions            | a = 9.0724(5) Å<br>b = 12.7579(7) Å<br>c = 16.0711(9) Å          | $\alpha$ = 81.026(4)°.<br>$\beta$ = 75.685(4)°.<br>$\gamma$ = 79.295(4)°. |
| Volume                          | 1759.15(17) Å <sup>3</sup>                                       |                                                                           |
| Z                               | 2                                                                |                                                                           |
| Density (calculated)            | 1.391 Mg/m <sup>3</sup>                                          |                                                                           |
| Absorption coefficient          | 3.061 mm <sup>-1</sup>                                           |                                                                           |
| $F(000)$                        | 772                                                              |                                                                           |
| Crystal size                    | 0.096 x 0.077 x 0.054 mm <sup>3</sup>                            |                                                                           |
| Theta range for data collection | 3.549 to 66.586°.                                                |                                                                           |

|                                 |                                          |
|---------------------------------|------------------------------------------|
| Index ranges                    | -10 ≤ h ≤ 10, -15 ≤ k ≤ 15, -19 ≤ l ≤ 19 |
| Reflections collected           | 47080                                    |
| Independent reflections         | 6152 [R(int) = 0.1039]                   |
| Completeness to theta = 66.586° | 99.2 %                                   |
| Absorption correction           | Semi-empirical from equivalents          |
| Refinement method               | Full-matrix least-squares on $F^2$       |
| Data / restraints / parameters  | 6152 / 2210 / 724                        |
| Goodness-of-fit on $F^2$        | 1.034                                    |
| Final R indices [I > 2σ(I)]     | R1 = 0.0570, wR2 = 0.1444                |
| R indices (all data)            | R1 = 0.0714, wR2 = 0.1548                |
| Largest diff. peak and hole     | 0.691 and -0.544 e.Å <sup>-3</sup>       |

**Table S30.** Atomic coordinates ( × 10<sup>4</sup>) and equivalent isotropic displacement parameters (Å<sup>2</sup> × 10<sup>3</sup>) for [Cr(BQA)<sub>2</sub>]. U(eq) is defined as one third of the trace of the orthogonalized U<sub>ij</sub> tensor.

|       | x         | y        | z        | U(eq) |
|-------|-----------|----------|----------|-------|
| Cr(1) | 3523(1)   | 6099(1)  | 2548(1)  | 29(1) |
| N(1)  | 1599(15)  | 5510(11) | 3297(15) | 28(3) |
| N(2)  | 4434(13)  | 4594(13) | 2800(20) | 33(3) |
| N(3)  | 5707(15)  | 6224(14) | 1980(20) | 30(2) |
| C(1)  | 162(18)   | 6031(13) | 3489(17) | 34(3) |
| C(2)  | -1078(17) | 5521(14) | 3991(15) | 41(3) |
| C(3)  | -796(18)  | 4448(13) | 4258(15) | 41(3) |
| C(4)  | 675(16)   | 3854(11) | 4032(17) | 37(2) |
| C(5)  | 1056(18)  | 2742(10) | 4290(12) | 45(3) |
| C(6)  | 2506(18)  | 2246(11) | 4021(12) | 43(3) |
| C(7)  | 3698(18)  | 2799(11) | 3531(18) | 39(3) |
| C(8)  | 3439(13)  | 3895(10) | 3286(10) | 32(1) |
| C(9)  | 1876(14)  | 4416(9)  | 3532(10) | 32(1) |
| C(10) | 6293(17)  | 7093(12) | 1524(15) | 36(3) |
| C(11) | 7895(17)  | 7093(13) | 1255(14) | 42(3) |
| C(12) | 8881(16)  | 6211(13) | 1407(13) | 40(3) |
| C(13) | 8326(14)  | 5260(12) | 1853(16) | 32(2) |
| C(14) | 9279(14)  | 4288(12) | 2027(12) | 37(3) |
| C(15) | 8645(12)  | 3411(12) | 2443(13) | 36(3) |
| C(16) | 7049(11)  | 3458(10) | 2760(8)  | 32(2) |

|        |           |          |          |       |
|--------|-----------|----------|----------|-------|
| C(17)  | 6029(13)  | 4387(12) | 2604(16) | 32(2) |
| C(18)  | 6697(14)  | 5306(14) | 2130(20) | 30(2) |
| N(1A)  | 1514(19)  | 5608(13) | 3150(18) | 29(3) |
| N(2A)  | 4322(15)  | 4552(14) | 2900(20) | 29(3) |
| N(3A)  | 5818(18)  | 6090(17) | 2060(30) | 31(4) |
| C(1A)  | 150(20)   | 6226(17) | 3340(20) | 37(4) |
| C(2A)  | -1170(20) | 5826(17) | 3848(18) | 44(4) |
| C(3A)  | -1030(18) | 4770(17) | 4192(17) | 41(4) |
| C(4A)  | 390(20)   | 4100(14) | 4040(20) | 38(3) |
| C(5A)  | 640(20)   | 2993(14) | 4352(13) | 42(3) |
| C(6A)  | 2050(20)  | 2427(13) | 4183(14) | 48(4) |
| C(7A)  | 3340(20)  | 2864(13) | 3680(19) | 42(3) |
| C(8A)  | 3196(16)  | 3939(12) | 3346(12) | 32(1) |
| C(9A)  | 1686(17)  | 4560(11) | 3524(12) | 32(1) |
| C(10A) | 6510(20)  | 6946(15) | 1684(17) | 33(3) |
| C(11A) | 8130(20)  | 6836(15) | 1394(17) | 44(4) |
| C(12A) | 8999(19)  | 5880(14) | 1518(15) | 40(3) |
| C(13A) | 8339(17)  | 4970(14) | 1940(20) | 35(3) |
| C(14A) | 9181(17)  | 3954(14) | 2101(14) | 35(3) |
| C(15A) | 8403(16)  | 3132(14) | 2507(15) | 40(3) |
| C(16A) | 6803(14)  | 3247(11) | 2730(10) | 32(2) |
| C(17A) | 5886(15)  | 4239(13) | 2610(20) | 32(2) |
| C(18A) | 6697(17)  | 5112(16) | 2200(30) | 31(3) |
| N(21)  | 3077(3)   | 5982(2)  | 1391(2)  | 34(1) |
| N(22)  | 2625(3)   | 7616(2)  | 2261(2)  | 36(1) |
| N(23)  | 3723(3)   | 6723(2)  | 3579(2)  | 31(1) |
| C(21)  | 3283(3)   | 5110(3)  | 992(2)   | 39(1) |
| C(22)  | 3009(4)   | 5156(3)  | 163(2)   | 47(1) |
| C(23)  | 2527(4)   | 6121(3)  | -259(2)  | 50(1) |
| C(24)  | 2304(4)   | 7064(3)  | 137(2)   | 46(1) |
| C(25)  | 1827(5)   | 8098(4)  | -253(2)  | 58(1) |
| C(26)  | 1656(5)   | 8964(4)  | 174(3)   | 62(1) |
| C(27)  | 1899(5)   | 8881(3)  | 1014(2)  | 54(1) |
| C(28)  | 2318(4)   | 7879(3)  | 1442(2)  | 41(1) |
| C(29)  | 2570(3)   | 6962(3)  | 981(2)   | 37(1) |
| C(30)  | 4443(4)   | 6256(2)  | 4203(2)  | 35(1) |
| C(31)  | 4429(4)   | 6769(3)  | 4914(2)  | 40(1) |
| C(32)  | 3606(4)   | 7771(3)  | 5008(2)  | 44(1) |
| C(33)  | 2831(4)   | 8303(2)  | 4357(2)  | 40(1) |

|        |          |           |          |        |
|--------|----------|-----------|----------|--------|
| C(34)  | 1920(5)  | 9332(3)   | 4400(2)  | 53(1)  |
| C(35)  | 1244(5)  | 9781(3)   | 3734(3)  | 59(1)  |
| C(36)  | 1437(5)  | 9271(3)   | 2994(2)  | 51(1)  |
| C(37)  | 2318(4)  | 8260(2)   | 2912(2)  | 38(1)  |
| C(38)  | 2955(3)  | 7758(2)   | 3635(2)  | 34(1)  |
| O(41)  | 2876(13) | 9555(7)   | 6556(6)  | 69(2)  |
| C(41)  | 3043(16) | 10644(9)  | 6196(6)  | 81(3)  |
| C(42)  | 3523(16) | 11076(11) | 6908(7)  | 90(3)  |
| C(43)  | 2362(10) | 10601(6)  | 7638(5)  | 59(2)  |
| C(44)  | 2319(12) | 9517(9)   | 7400(8)  | 64(2)  |
| O(41A) | 3421(14) | 9351(8)   | 6637(8)  | 71(3)  |
| C(41A) | 4083(16) | 10273(7)  | 6254(7)  | 73(3)  |
| C(42A) | 2922(16) | 11229(9)  | 6730(8)  | 77(3)  |
| C(43A) | 3380(20) | 10579(9)  | 7555(8)  | 95(3)  |
| C(44A) | 2820(20) | 9559(11)  | 7466(9)  | 85(4)  |
| O(51)  | 2899(9)  | 11280(6)  | 428(4)   | 85(2)  |
| C(51)  | 1885(15) | 11953(16) | 992(9)   | 76(3)  |
| C(52)  | 2633(16) | 12051(13) | 1718(8)  | 87(3)  |
| C(53)  | 4116(15) | 11333(15) | 1507(10) | 119(4) |
| C(54)  | 4289(12) | 11078(12) | 636(9)   | 110(3) |
| O(51A) | 1646(7)  | 11502(5)  | 1554(4)  | 67(2)  |
| C(51A) | 2683(16) | 11770(14) | 1953(8)  | 83(3)  |
| C(52A) | 4207(12) | 11900(11) | 1327(8)  | 81(3)  |
| C(53A) | 3822(12) | 11880(13) | 491(7)   | 98(3)  |
| C(54A) | 2115(14) | 11938(16) | 706(8)   | 74(3)  |

**Table S31.** Bond lengths [ $\text{\AA}$ ] and angles [ $^\circ$ ] for  $[\text{Cr}(\text{BQA})_2]$ .

|             |           |            |           |
|-------------|-----------|------------|-----------|
| Cr(1)-N(2)  | 1.967(14) | N(1)-C(9)  | 1.380(10) |
| Cr(1)-N(22) | 1.986(3)  | N(2)-C(17) | 1.386(9)  |
| Cr(1)-N(3)  | 1.991(13) | N(2)-C(8)  | 1.397(9)  |
| Cr(1)-N(1A) | 2.003(15) | N(3)-C(10) | 1.349(10) |
| Cr(1)-N(23) | 2.007(2)  | N(3)-C(18) | 1.368(10) |
| Cr(1)-N(2A) | 2.014(14) | C(1)-C(2)  | 1.414(10) |
| Cr(1)-N(21) | 2.030(3)  | C(1)-H(1)  | 0.9500    |
| Cr(1)-N(3A) | 2.034(15) | C(2)-C(3)  | 1.365(10) |
| Cr(1)-N(1)  | 2.056(12) | C(2)-H(2)  | 0.9500    |
| N(1)-C(1)   | 1.334(10) | C(3)-C(4)  | 1.400(10) |

|              |           |               |           |
|--------------|-----------|---------------|-----------|
| C(3)-H(3)    | 0.9500    | C(5A)-C(6A)   | 1.333(12) |
| C(4)-C(5)    | 1.418(10) | C(5A)-H(5A)   | 0.9500    |
| C(4)-C(9)    | 1.423(9)  | C(6A)-C(7A)   | 1.405(12) |
| C(5)-C(6)    | 1.346(10) | C(6A)-H(6A)   | 0.9500    |
| C(5)-H(5)    | 0.9500    | C(7A)-C(8A)   | 1.388(11) |
| C(6)-C(7)    | 1.406(10) | C(7A)-H(7A)   | 0.9500    |
| C(6)-H(6)    | 0.9500    | C(8A)-C(9A)   | 1.435(9)  |
| C(7)-C(8)    | 1.385(10) | C(10A)-C(11A) | 1.412(12) |
| C(7)-H(7)    | 0.9500    | C(10A)-H(10A) | 0.9500    |
| C(8)-C(9)    | 1.437(8)  | C(11A)-C(12A) | 1.339(12) |
| C(10)-C(11)  | 1.410(10) | C(11A)-H(11A) | 0.9500    |
| C(10)-H(10)  | 0.9500    | C(12A)-C(13A) | 1.406(11) |
| C(11)-C(12)  | 1.332(10) | C(12A)-H(12A) | 0.9500    |
| C(11)-H(11)  | 0.9500    | C(13A)-C(14A) | 1.399(11) |
| C(12)-C(13)  | 1.420(9)  | C(13A)-C(18A) | 1.429(11) |
| C(12)-H(12)  | 0.9500    | C(14A)-C(15A) | 1.362(11) |
| C(13)-C(14)  | 1.406(10) | C(14A)-H(14A) | 0.9500    |
| C(13)-C(18)  | 1.427(9)  | C(15A)-C(16A) | 1.392(11) |
| C(14)-C(15)  | 1.358(10) | C(15A)-H(15A) | 0.9500    |
| C(14)-H(14)  | 0.9500    | C(16A)-C(17A) | 1.394(9)  |
| C(15)-C(16)  | 1.404(9)  | C(16A)-H(16A) | 0.9500    |
| C(15)-H(15)  | 0.9500    | C(17A)-C(18A) | 1.433(11) |
| C(16)-C(17)  | 1.392(8)  | N(21)-C(21)   | 1.331(4)  |
| C(16)-H(16)  | 0.9500    | N(21)-C(29)   | 1.375(4)  |
| C(17)-C(18)  | 1.441(9)  | N(22)-C(37)   | 1.373(4)  |
| N(1A)-C(1A)  | 1.334(11) | N(22)-C(28)   | 1.390(4)  |
| N(1A)-C(9A)  | 1.376(10) | N(23)-C(30)   | 1.333(4)  |
| N(2A)-C(17A) | 1.381(11) | N(23)-C(38)   | 1.379(4)  |
| N(2A)-C(8A)  | 1.390(10) | C(21)-C(22)   | 1.404(5)  |
| N(3A)-C(10A) | 1.348(11) | C(21)-H(21)   | 0.9500    |
| N(3A)-C(18A) | 1.370(11) | C(22)-C(23)   | 1.362(5)  |
| C(1A)-C(2A)  | 1.403(12) | C(22)-H(22)   | 0.9500    |
| C(1A)-H(1A)  | 0.9500    | C(23)-C(24)   | 1.406(5)  |
| C(2A)-C(3A)  | 1.369(12) | C(23)-H(23)   | 0.9500    |
| C(2A)-H(2A)  | 0.9500    | C(24)-C(25)   | 1.408(5)  |
| C(3A)-C(4A)  | 1.395(11) | C(24)-C(29)   | 1.419(4)  |
| C(3A)-H(3A)  | 0.9500    | C(25)-C(26)   | 1.355(6)  |
| C(4A)-C(5A)  | 1.421(11) | C(25)-H(25)   | 0.9500    |
| C(4A)-C(9A)  | 1.428(10) | C(26)-C(27)   | 1.406(5)  |

|               |           |                   |           |
|---------------|-----------|-------------------|-----------|
| C(26)-H(26)   | 0.9500    | C(42A)-H(42D)     | 0.9900    |
| C(27)-C(28)   | 1.388(5)  | C(43A)-C(44A)     | 1.523(14) |
| C(27)-H(27)   | 0.9500    | C(43A)-H(43C)     | 0.9900    |
| C(28)-C(29)   | 1.433(5)  | C(43A)-H(43D)     | 0.9900    |
| C(30)-C(31)   | 1.400(4)  | C(44A)-H(44C)     | 0.9900    |
| C(30)-H(30)   | 0.9500    | C(44A)-H(44D)     | 0.9900    |
| C(31)-C(32)   | 1.365(5)  | O(51)-C(54)       | 1.353(12) |
| C(31)-H(31)   | 0.9500    | O(51)-C(51)       | 1.393(12) |
| C(32)-C(33)   | 1.419(5)  | C(51)-C(52)       | 1.519(14) |
| C(32)-H(32)   | 0.9500    | C(51)-H(51A)      | 0.9900    |
| C(33)-C(38)   | 1.415(4)  | C(51)-H(51B)      | 0.9900    |
| C(33)-C(34)   | 1.417(5)  | C(52)-C(53)       | 1.476(14) |
| C(34)-C(35)   | 1.361(5)  | C(52)-H(52A)      | 0.9900    |
| C(34)-H(34)   | 0.9500    | C(52)-H(52B)      | 0.9900    |
| C(35)-C(36)   | 1.402(5)  | C(53)-C(54)       | 1.450(14) |
| C(35)-H(35)   | 0.9500    | C(53)-H(53A)      | 0.9900    |
| C(36)-C(37)   | 1.393(5)  | C(53)-H(53B)      | 0.9900    |
| C(36)-H(36)   | 0.9500    | C(54)-H(54A)      | 0.9900    |
| C(37)-C(38)   | 1.434(4)  | C(54)-H(54B)      | 0.9900    |
| O(41)-C(44)   | 1.322(10) | O(51A)-C(51A)     | 1.378(13) |
| O(41)-C(41)   | 1.439(10) | O(51A)-C(54A)     | 1.383(12) |
| C(41)-C(42)   | 1.528(12) | C(51A)-C(52A)     | 1.515(14) |
| C(41)-H(41A)  | 0.9900    | C(51A)-H(51C)     | 0.9900    |
| C(41)-H(41B)  | 0.9900    | C(51A)-H(51D)     | 0.9900    |
| C(42)-C(43)   | 1.503(11) | C(52A)-C(53A)     | 1.474(13) |
| C(42)-H(42A)  | 0.9900    | C(52A)-H(52C)     | 0.9900    |
| C(42)-H(42B)  | 0.9900    | C(52A)-H(52D)     | 0.9900    |
| C(43)-C(44)   | 1.501(11) | C(53A)-C(54A)     | 1.492(13) |
| C(43)-H(43A)  | 0.9900    | C(53A)-H(53C)     | 0.9900    |
| C(43)-H(43B)  | 0.9900    | C(53A)-H(53D)     | 0.9900    |
| C(44)-H(44A)  | 0.9900    | C(54A)-H(54C)     | 0.9900    |
| C(44)-H(44B)  | 0.9900    | C(54A)-H(54D)     | 0.9900    |
| O(41A)-C(44A) | 1.358(12) |                   |           |
| O(41A)-C(41A) | 1.406(10) | N(2)-Cr(1)-N(22)  | 178.5(9)  |
| C(41A)-C(42A) | 1.612(13) | N(2)-Cr(1)-N(3)   | 81.6(5)   |
| C(41A)-H(41C) | 0.9900    | N(22)-Cr(1)-N(3)  | 97.6(4)   |
| C(41A)-H(41D) | 0.9900    | N(22)-Cr(1)-N(1A) | 95.5(4)   |
| C(42A)-C(43A) | 1.556(13) | N(2)-Cr(1)-N(23)  | 100.8(10) |
| C(42A)-H(42C) | 0.9900    | N(22)-Cr(1)-N(23) | 80.44(10) |

|                   |            |                   |           |
|-------------------|------------|-------------------|-----------|
| N(3)-Cr(1)-N(23)  | 90.5(13)   | C(3)-C(4)-C(5)    | 124.5(9)  |
| N(1A)-Cr(1)-N(23) | 93.7(10)   | C(3)-C(4)-C(9)    | 117.5(8)  |
| N(22)-Cr(1)-N(2A) | 176.6(6)   | C(5)-C(4)-C(9)    | 118.0(8)  |
| N(1A)-Cr(1)-N(2A) | 81.3(5)    | C(6)-C(5)-C(4)    | 119.4(9)  |
| N(23)-Cr(1)-N(2A) | 98.4(12)   | C(6)-C(5)-H(5)    | 120.3     |
| N(2)-Cr(1)-N(21)  | 98.0(10)   | C(4)-C(5)-H(5)    | 120.3     |
| N(22)-Cr(1)-N(21) | 80.79(10)  | C(5)-C(6)-C(7)    | 122.7(9)  |
| N(3)-Cr(1)-N(21)  | 90.5(12)   | C(5)-C(6)-H(6)    | 118.7     |
| N(1A)-Cr(1)-N(21) | 89.6(9)    | C(7)-C(6)-H(6)    | 118.7     |
| N(23)-Cr(1)-N(21) | 161.17(10) | C(8)-C(7)-C(6)    | 121.5(9)  |
| N(2A)-Cr(1)-N(21) | 100.5(12)  | C(8)-C(7)-H(7)    | 119.3     |
| N(22)-Cr(1)-N(3A) | 103.2(5)   | C(6)-C(7)-H(7)    | 119.3     |
| N(1A)-Cr(1)-N(3A) | 161.3(6)   | C(7)-C(8)-N(2)    | 131.0(9)  |
| N(23)-Cr(1)-N(3A) | 88.7(15)   | C(7)-C(8)-C(9)    | 115.9(7)  |
| N(2A)-Cr(1)-N(3A) | 79.9(5)    | N(2)-C(8)-C(9)    | 113.0(8)  |
| N(21)-Cr(1)-N(3A) | 94.1(15)   | N(1)-C(9)-C(4)    | 121.0(8)  |
| N(2)-Cr(1)-N(1)   | 80.6(4)    | N(1)-C(9)-C(8)    | 116.7(8)  |
| N(22)-Cr(1)-N(1)  | 100.3(3)   | C(4)-C(9)-C(8)    | 122.3(7)  |
| N(3)-Cr(1)-N(1)   | 161.7(5)   | N(3)-C(10)-C(11)  | 121.4(10) |
| N(23)-Cr(1)-N(1)  | 88.7(8)    | N(3)-C(10)-H(10)  | 119.3     |
| N(21)-Cr(1)-N(1)  | 96.1(8)    | C(11)-C(10)-H(10) | 119.3     |
| C(1)-N(1)-C(9)    | 119.3(10)  | C(12)-C(11)-C(10) | 120.8(10) |
| C(1)-N(1)-Cr(1)   | 127.8(8)   | C(12)-C(11)-H(11) | 119.6     |
| C(9)-N(1)-Cr(1)   | 112.5(7)   | C(10)-C(11)-H(11) | 119.6     |
| C(17)-N(2)-C(8)   | 126.5(11)  | C(11)-C(12)-C(13) | 120.1(9)  |
| C(17)-N(2)-Cr(1)  | 115.6(8)   | C(11)-C(12)-H(12) | 119.9     |
| C(8)-N(2)-Cr(1)   | 117.0(7)   | C(13)-C(12)-H(12) | 119.9     |
| C(10)-N(3)-C(18)  | 118.8(9)   | C(14)-C(13)-C(12) | 124.0(8)  |
| C(10)-N(3)-Cr(1)  | 128.4(9)   | C(14)-C(13)-C(18) | 118.7(8)  |
| C(18)-N(3)-Cr(1)  | 112.7(8)   | C(12)-C(13)-C(18) | 117.2(8)  |
| N(1)-C(1)-C(2)    | 122.3(10)  | C(15)-C(14)-C(13) | 120.0(9)  |
| N(1)-C(1)-H(1)    | 118.8      | C(15)-C(14)-H(14) | 120.0     |
| C(2)-C(1)-H(1)    | 118.8      | C(13)-C(14)-H(14) | 120.0     |
| C(3)-C(2)-C(1)    | 118.5(9)   | C(14)-C(15)-C(16) | 121.8(9)  |
| C(3)-C(2)-H(2)    | 120.8      | C(14)-C(15)-H(15) | 119.1     |
| C(1)-C(2)-H(2)    | 120.8      | C(16)-C(15)-H(15) | 119.1     |
| C(2)-C(3)-C(4)    | 121.3(9)   | C(17)-C(16)-C(15) | 121.5(7)  |
| C(2)-C(3)-H(3)    | 119.3      | C(17)-C(16)-H(16) | 119.3     |
| C(4)-C(3)-H(3)    | 119.3      | C(15)-C(16)-H(16) | 119.3     |

|                     |           |                      |            |
|---------------------|-----------|----------------------|------------|
| N(2)-C(17)-C(16)    | 131.4(8)  | N(1A)-C(9A)-C(4A)    | 120.7(10)  |
| N(2)-C(17)-C(18)    | 112.0(9)  | N(1A)-C(9A)-C(8A)    | 117.6(9)   |
| C(16)-C(17)-C(18)   | 116.6(7)  | C(4A)-C(9A)-C(8A)    | 121.7(8)   |
| N(3)-C(18)-C(13)    | 121.6(8)  | N(3A)-C(10A)-C(11A)  | 120.8(12)  |
| N(3)-C(18)-C(17)    | 117.2(8)  | N(3A)-C(10A)-H(10A)  | 119.6      |
| C(13)-C(18)-C(17)   | 121.2(9)  | C(11A)-C(10A)-H(10A) | 119.6      |
| C(1A)-N(1A)-C(9A)   | 119.3(11) | C(12A)-C(11A)-C(10A) | 120.2(11)  |
| C(1A)-N(1A)-Cr(1)   | 126.6(11) | C(12A)-C(11A)-H(11A) | 119.9      |
| C(9A)-N(1A)-Cr(1)   | 113.0(8)  | C(10A)-C(11A)-H(11A) | 119.9      |
| C(17A)-N(2A)-C(8A)  | 129.4(11) | C(11A)-C(12A)-C(13A) | 121.4(11)  |
| C(17A)-N(2A)-Cr(1)  | 115.7(8)  | C(11A)-C(12A)-H(12A) | 119.3      |
| C(8A)-N(2A)-Cr(1)   | 114.8(8)  | C(13A)-C(12A)-H(12A) | 119.3      |
| C(10A)-N(3A)-C(18A) | 119.5(11) | C(14A)-C(13A)-C(12A) | 124.3(10)  |
| C(10A)-N(3A)-Cr(1)  | 126.5(11) | C(14A)-C(13A)-C(18A) | 119.1(10)  |
| C(18A)-N(3A)-Cr(1)  | 113.9(8)  | C(12A)-C(13A)-C(18A) | 116.6(10)  |
| N(1A)-C(1A)-C(2A)   | 122.5(13) | C(15A)-C(14A)-C(13A) | 118.7(10)  |
| N(1A)-C(1A)-H(1A)   | 118.8     | C(15A)-C(14A)-H(14A) | 120.7      |
| C(2A)-C(1A)-H(1A)   | 118.8     | C(13A)-C(14A)-H(14A) | 120.7      |
| C(3A)-C(2A)-C(1A)   | 118.8(12) | C(14A)-C(15A)-C(16A) | 122.8(11)  |
| C(3A)-C(2A)-H(2A)   | 120.6     | C(14A)-C(15A)-H(15A) | 118.6      |
| C(1A)-C(2A)-H(2A)   | 120.6     | C(16A)-C(15A)-H(15A) | 118.6      |
| C(2A)-C(3A)-C(4A)   | 120.9(11) | C(15A)-C(16A)-C(17A) | 121.8(8)   |
| C(2A)-C(3A)-H(3A)   | 119.6     | C(15A)-C(16A)-H(16A) | 119.1      |
| C(4A)-C(3A)-H(3A)   | 119.6     | C(17A)-C(16A)-H(16A) | 119.1      |
| C(3A)-C(4A)-C(5A)   | 125.0(10) | N(2A)-C(17A)-C(16A)  | 130.7(9)   |
| C(3A)-C(4A)-C(9A)   | 117.7(10) | N(2A)-C(17A)-C(18A)  | 113.4(10)  |
| C(5A)-C(4A)-C(9A)   | 117.3(10) | C(16A)-C(17A)-C(18A) | 115.6(8)   |
| C(6A)-C(5A)-C(4A)   | 120.4(11) | N(3A)-C(18A)-C(13A)  | 121.5(10)  |
| C(6A)-C(5A)-H(5A)   | 119.8     | N(3A)-C(18A)-C(17A)  | 116.6(10)  |
| C(4A)-C(5A)-H(5A)   | 119.8     | C(13A)-C(18A)-C(17A) | 121.9(10)  |
| C(5A)-C(6A)-C(7A)   | 123.2(12) | C(21)-N(21)-C(29)    | 118.9(3)   |
| C(5A)-C(6A)-H(6A)   | 118.4     | C(21)-N(21)-Cr(1)    | 128.4(2)   |
| C(7A)-C(6A)-H(6A)   | 118.4     | C(29)-N(21)-Cr(1)    | 112.6(2)   |
| C(8A)-C(7A)-C(6A)   | 120.2(11) | C(37)-N(22)-C(28)    | 128.2(3)   |
| C(8A)-C(7A)-H(7A)   | 119.9     | C(37)-N(22)-Cr(1)    | 115.8(2)   |
| C(6A)-C(7A)-H(7A)   | 119.9     | C(28)-N(22)-Cr(1)    | 115.9(2)   |
| C(7A)-C(8A)-N(2A)   | 129.8(11) | C(30)-N(23)-C(38)    | 118.4(3)   |
| C(7A)-C(8A)-C(9A)   | 117.2(9)  | C(30)-N(23)-Cr(1)    | 128.5(2)   |
| N(2A)-C(8A)-C(9A)   | 112.8(10) | C(38)-N(23)-Cr(1)    | 113.08(19) |



|                   |          |                     |          |
|-------------------|----------|---------------------|----------|
| N(21)-C(21)-C(22) | 122.3(3) | C(35)-C(34)-C(33)   | 119.3(3) |
| N(21)-C(21)-H(21) | 118.8    | C(35)-C(34)-H(34)   | 120.3    |
| C(22)-C(21)-H(21) | 118.8    | C(33)-C(34)-H(34)   | 120.3    |
| C(23)-C(22)-C(21) | 119.6(3) | C(34)-C(35)-C(36)   | 122.4(3) |
| C(23)-C(22)-H(22) | 120.2    | C(34)-C(35)-H(35)   | 118.8    |
| C(21)-C(22)-H(22) | 120.2    | C(36)-C(35)-H(35)   | 118.8    |
| C(22)-C(23)-C(24) | 119.9(3) | C(37)-C(36)-C(35)   | 121.2(3) |
| C(22)-C(23)-H(23) | 120.0    | C(37)-C(36)-H(36)   | 119.4    |
| C(24)-C(23)-H(23) | 120.0    | C(35)-C(36)-H(36)   | 119.4    |
| C(23)-C(24)-C(25) | 124.0(3) | N(22)-C(37)-C(36)   | 130.6(3) |
| C(23)-C(24)-C(29) | 117.7(3) | N(22)-C(37)-C(38)   | 112.9(3) |
| C(25)-C(24)-C(29) | 118.3(3) | C(36)-C(37)-C(38)   | 116.5(3) |
| C(26)-C(25)-C(24) | 120.0(3) | N(23)-C(38)-C(33)   | 121.8(3) |
| C(26)-C(25)-H(25) | 120.0    | N(23)-C(38)-C(37)   | 116.3(3) |
| C(24)-C(25)-H(25) | 120.0    | C(33)-C(38)-C(37)   | 121.9(3) |
| C(25)-C(26)-C(27) | 122.7(4) | C(44)-O(41)-C(41)   | 109.6(8) |
| C(25)-C(26)-H(26) | 118.7    | O(41)-C(41)-C(42)   | 102.5(8) |
| C(27)-C(26)-H(26) | 118.7    | O(41)-C(41)-H(41A)  | 111.3    |
| C(28)-C(27)-C(26) | 119.9(4) | C(42)-C(41)-H(41A)  | 111.3    |
| C(28)-C(27)-H(27) | 120.1    | O(41)-C(41)-H(41B)  | 111.3    |
| C(26)-C(27)-H(27) | 120.1    | C(42)-C(41)-H(41B)  | 111.3    |
| C(27)-C(28)-N(22) | 129.3(3) | H(41A)-C(41)-H(41B) | 109.2    |
| C(27)-C(28)-C(29) | 117.8(3) | C(43)-C(42)-C(41)   | 95.4(7)  |
| N(22)-C(28)-C(29) | 112.8(3) | C(43)-C(42)-H(42A)  | 112.7    |
| N(21)-C(29)-C(24) | 121.4(3) | C(41)-C(42)-H(42A)  | 112.7    |
| N(21)-C(29)-C(28) | 117.3(3) | C(43)-C(42)-H(42B)  | 112.7    |
| C(24)-C(29)-C(28) | 121.3(3) | C(41)-C(42)-H(42B)  | 112.7    |
| N(23)-C(30)-C(31) | 122.6(3) | H(42A)-C(42)-H(42B) | 110.2    |
| N(23)-C(30)-H(30) | 118.7    | C(44)-C(43)-C(42)   | 104.7(7) |
| C(31)-C(30)-H(30) | 118.7    | C(44)-C(43)-H(43A)  | 110.8    |
| C(32)-C(31)-C(30) | 120.1(3) | C(42)-C(43)-H(43A)  | 110.8    |
| C(32)-C(31)-H(31) | 120.0    | C(44)-C(43)-H(43B)  | 110.8    |
| C(30)-C(31)-H(31) | 120.0    | C(42)-C(43)-H(43B)  | 110.8    |
| C(31)-C(32)-C(33) | 119.3(3) | H(43A)-C(43)-H(43B) | 108.9    |
| C(31)-C(32)-H(32) | 120.4    | O(41)-C(44)-C(43)   | 106.3(8) |
| C(33)-C(32)-H(32) | 120.4    | O(41)-C(44)-H(44A)  | 110.5    |
| C(38)-C(33)-C(34) | 118.5(3) | C(43)-C(44)-H(44A)  | 110.5    |
| C(38)-C(33)-C(32) | 117.6(3) | O(41)-C(44)-H(44B)  | 110.5    |
| C(34)-C(33)-C(32) | 123.8(3) | C(43)-C(44)-H(44B)  | 110.5    |

|                      |           |                      |           |
|----------------------|-----------|----------------------|-----------|
| H(44A)-C(44)-H(44B)  | 108.7     | H(52A)-C(52)-H(52B)  | 109.2     |
| C(44A)-O(41A)-C(41A) | 102.9(9)  | C(54)-C(53)-C(52)    | 106.7(10) |
| O(41A)-C(41A)-C(42A) | 103.7(9)  | C(54)-C(53)-H(53A)   | 110.4     |
| O(41A)-C(41A)-H(41C) | 111.0     | C(52)-C(53)-H(53A)   | 110.4     |
| C(42A)-C(41A)-H(41C) | 111.0     | C(54)-C(53)-H(53B)   | 110.4     |
| O(41A)-C(41A)-H(41D) | 111.0     | C(52)-C(53)-H(53B)   | 110.4     |
| C(42A)-C(41A)-H(41D) | 111.0     | H(53A)-C(53)-H(53B)  | 108.6     |
| H(41C)-C(41A)-H(41D) | 109.0     | O(51)-C(54)-C(53)    | 109.5(9)  |
| C(43A)-C(42A)-C(41A) | 83.3(9)   | O(51)-C(54)-H(54A)   | 109.8     |
| C(43A)-C(42A)-H(42C) | 114.8     | C(53)-C(54)-H(54A)   | 109.8     |
| C(41A)-C(42A)-H(42C) | 114.8     | O(51)-C(54)-H(54B)   | 109.8     |
| C(43A)-C(42A)-H(42D) | 114.8     | C(53)-C(54)-H(54B)   | 109.8     |
| C(41A)-C(42A)-H(42D) | 114.8     | H(54A)-C(54)-H(54B)  | 108.2     |
| H(42C)-C(42A)-H(42D) | 111.8     | C(51A)-O(51A)-C(54A) | 102.9(9)  |
| C(44A)-C(43A)-C(42A) | 95.4(10)  | O(51A)-C(51A)-C(52A) | 111.9(9)  |
| C(44A)-C(43A)-H(43C) | 112.7     | O(51A)-C(51A)-H(51C) | 109.2     |
| C(42A)-C(43A)-H(43C) | 112.7     | C(52A)-C(51A)-H(51C) | 109.2     |
| C(44A)-C(43A)-H(43D) | 112.7     | O(51A)-C(51A)-H(51D) | 109.2     |
| C(42A)-C(43A)-H(43D) | 112.7     | C(52A)-C(51A)-H(51D) | 109.2     |
| H(43C)-C(43A)-H(43D) | 110.1     | H(51C)-C(51A)-H(51D) | 107.9     |
| O(41A)-C(44A)-C(43A) | 106.1(10) | C(53A)-C(52A)-C(51A) | 101.4(8)  |
| O(41A)-C(44A)-H(44C) | 110.5     | C(53A)-C(52A)-H(52C) | 111.5     |
| C(43A)-C(44A)-H(44C) | 110.5     | C(51A)-C(52A)-H(52C) | 111.5     |
| O(41A)-C(44A)-H(44D) | 110.5     | C(53A)-C(52A)-H(52D) | 111.5     |
| C(43A)-C(44A)-H(44D) | 110.5     | C(51A)-C(52A)-H(52D) | 111.5     |
| H(44C)-C(44A)-H(44D) | 108.7     | H(52C)-C(52A)-H(52D) | 109.3     |
| C(54)-O(51)-C(51)    | 109.2(9)  | C(52A)-C(53A)-C(54A) | 104.4(8)  |
| O(51)-C(51)-C(52)    | 109.0(10) | C(52A)-C(53A)-H(53C) | 110.9     |
| O(51)-C(51)-H(51A)   | 109.9     | C(54A)-C(53A)-H(53C) | 110.9     |
| C(52)-C(51)-H(51A)   | 109.9     | C(52A)-C(53A)-H(53D) | 110.9     |
| O(51)-C(51)-H(51B)   | 109.9     | C(54A)-C(53A)-H(53D) | 110.9     |
| C(52)-C(51)-H(51B)   | 109.9     | H(53C)-C(53A)-H(53D) | 108.9     |
| H(51A)-C(51)-H(51B)  | 108.3     | O(51A)-C(54A)-C(53A) | 108.9(9)  |
| C(53)-C(52)-C(51)    | 102.3(10) | O(51A)-C(54A)-H(54C) | 109.9     |
| C(53)-C(52)-H(52A)   | 111.3     | C(53A)-C(54A)-H(54C) | 109.9     |
| C(51)-C(52)-H(52A)   | 111.3     | O(51A)-C(54A)-H(54D) | 109.9     |
| C(53)-C(52)-H(52B)   | 111.3     | C(53A)-C(54A)-H(54D) | 109.9     |
| C(51)-C(52)-H(52B)   | 111.3     | H(54C)-C(54A)-H(54D) | 108.3     |

**Table S32.** Anisotropic displacement parameters ( $\text{\AA}^2 \times 10^3$ ) for  $[\text{Cr}(\text{BQA})_2]$ . The anisotropic displacement factor exponent takes the form:  $-2\pi^2 [h^2 a^{*2} U^{11} + \dots + 2 h k a^* b^* U^{12}]$

|       | U <sup>11</sup> | U <sup>22</sup> | U <sup>33</sup> | U <sup>23</sup> | U <sup>13</sup> | U <sup>12</sup> |
|-------|-----------------|-----------------|-----------------|-----------------|-----------------|-----------------|
| Cr(1) | 26(1)           | 32(1)           | 29(1)           | -4(1)           | -5(1)           | -5(1)           |
| N(1)  | 27(3)           | 41(4)           | 17(7)           | -4(3)           | -7(3)           | -4(3)           |
| N(2)  | 29(3)           | 42(5)           | 28(7)           | -6(3)           | -2(3)           | -12(3)          |
| N(3)  | 31(4)           | 31(5)           | 29(5)           | -3(4)           | -8(4)           | -3(3)           |
| C(1)  | 32(4)           | 40(5)           | 29(8)           | -5(5)           | -5(4)           | -4(3)           |
| C(2)  | 29(4)           | 49(8)           | 40(8)           | -6(6)           | 0(4)            | -5(5)           |
| C(3)  | 38(6)           | 44(6)           | 40(6)           | -8(5)           | 2(5)            | -14(4)          |
| C(4)  | 35(5)           | 42(6)           | 36(4)           | -7(5)           | -7(4)           | -11(4)          |
| C(5)  | 42(7)           | 37(5)           | 49(5)           | -1(5)           | 6(6)            | -15(5)          |
| C(6)  | 48(6)           | 32(4)           | 49(7)           | -1(4)           | -11(5)          | -14(4)          |
| C(7)  | 33(5)           | 39(4)           | 44(8)           | -3(3)           | -3(4)           | -9(3)           |
| C(8)  | 34(2)           | 37(2)           | 28(1)           | -4(1)           | -9(2)           | -10(2)          |
| C(9)  | 34(2)           | 37(2)           | 28(1)           | -4(1)           | -9(2)           | -10(2)          |
| C(10) | 32(4)           | 33(5)           | 40(8)           | 1(4)            | -7(4)           | -7(4)           |
| C(11) | 32(5)           | 33(6)           | 55(7)           | -1(4)           | -1(4)           | -6(4)           |
| C(12) | 28(4)           | 35(7)           | 55(5)           | -4(6)           | -2(4)           | -11(5)          |
| C(13) | 32(3)           | 33(6)           | 33(5)           | -8(6)           | -9(3)           | -4(3)           |
| C(14) | 30(4)           | 34(6)           | 47(5)           | -9(5)           | -9(3)           | -4(4)           |
| C(15) | 32(4)           | 33(7)           | 47(6)           | -3(5)           | -15(4)          | -2(3)           |
| C(16) | 37(2)           | 33(3)           | 30(1)           | -8(3)           | -13(2)          | -6(2)           |
| C(17) | 37(2)           | 33(3)           | 30(1)           | -8(3)           | -13(2)          | -6(2)           |
| C(18) | 28(4)           | 35(6)           | 27(5)           | -4(6)           | -7(4)           | -8(3)           |
| N(1A) | 34(4)           | 38(4)           | 19(8)           | -4(3)           | -10(4)          | -7(3)           |
| N(2A) | 34(4)           | 24(5)           | 25(7)           | -2(4)           | -7(4)           | 1(3)            |
| N(3A) | 28(4)           | 31(5)           | 35(9)           | -5(5)           | -6(5)           | -5(4)           |
| C(1A) | 25(4)           | 48(7)           | 33(10)          | -2(5)           | 1(4)            | -6(4)           |
| C(2A) | 35(5)           | 56(8)           | 37(8)           | -10(7)          | 2(5)            | -9(5)           |
| C(3A) | 29(5)           | 55(10)          | 37(6)           | 0(9)            | -2(4)           | -12(5)          |
| C(4A) | 39(6)           | 46(7)           | 31(5)           | -2(6)           | -5(6)           | -15(5)          |
| C(5A) | 43(7)           | 50(7)           | 37(6)           | 2(6)            | -12(5)          | -18(5)          |
| C(6A) | 49(9)           | 40(7)           | 52(8)           | 2(6)            | -4(7)           | -16(6)          |
| C(7A) | 47(8)           | 41(5)           | 44(10)          | 2(5)            | -18(7)          | -15(5)          |

|        |        |       |       |        |        |        |
|--------|--------|-------|-------|--------|--------|--------|
| C(8A)  | 34(2)  | 37(2) | 28(1) | -4(1)  | -9(2)  | -10(2) |
| C(9A)  | 34(2)  | 37(2) | 28(1) | -4(1)  | -9(2)  | -10(2) |
| C(10A) | 32(5)  | 34(5) | 34(8) | 2(4)   | -11(5) | -5(4)  |
| C(11A) | 31(6)  | 36(8) | 63(9) | -4(7)  | -5(6)  | -8(5)  |
| C(12A) | 32(5)  | 32(8) | 54(8) | -19(6) | -4(4)  | 1(5)   |
| C(13A) | 35(4)  | 33(7) | 41(7) | -13(6) | -9(4)  | -5(4)  |
| C(14A) | 32(5)  | 33(8) | 46(7) | -13(6) | -18(4) | -2(4)  |
| C(15A) | 48(5)  | 36(7) | 34(5) | -2(5)  | -10(5) | 1(4)   |
| C(16A) | 37(2)  | 33(3) | 30(1) | -8(3)  | -13(2) | -6(2)  |
| C(17A) | 37(2)  | 33(3) | 30(1) | -8(3)  | -13(2) | -6(2)  |
| C(18A) | 30(4)  | 30(5) | 34(9) | -11(5) | -10(4) | 2(3)   |
| N(21)  | 27(1)  | 42(1) | 32(1) | -6(1)  | -3(1)  | -6(1)  |
| N(22)  | 39(1)  | 34(1) | 35(1) | -2(1)  | -8(1)  | -2(1)  |
| N(23)  | 31(1)  | 32(1) | 29(1) | -2(1)  | -4(1)  | -8(1)  |
| C(21)  | 30(2)  | 49(2) | 38(2) | -12(1) | -3(1)  | -6(1)  |
| C(22)  | 36(2)  | 67(2) | 42(2) | -19(2) | -3(2)  | -10(2) |
| C(23)  | 39(2)  | 81(2) | 32(2) | -10(2) | -6(1)  | -11(2) |
| C(24)  | 34(2)  | 67(2) | 35(2) | -3(2)  | -6(1)  | -6(2)  |
| C(25)  | 53(2)  | 80(3) | 36(2) | 8(2)   | -15(2) | -3(2)  |
| C(26)  | 67(3)  | 64(2) | 46(2) | 12(2)  | -14(2) | 5(2)   |
| C(27)  | 61(2)  | 47(2) | 46(2) | 4(2)   | -10(2) | 4(2)   |
| C(28)  | 38(2)  | 46(2) | 34(2) | 1(1)   | -5(1)  | -4(1)  |
| C(29)  | 28(2)  | 50(2) | 31(2) | 1(1)   | -4(1)  | -5(1)  |
| C(30)  | 35(2)  | 36(2) | 34(2) | -1(1)  | -6(1)  | -10(1) |
| C(31)  | 48(2)  | 44(2) | 32(2) | 2(1)   | -10(1) | -17(1) |
| C(32)  | 61(2)  | 44(2) | 31(2) | -6(1)  | -6(2)  | -21(2) |
| C(33)  | 51(2)  | 35(2) | 35(2) | -5(1)  | -2(1)  | -16(1) |
| C(34)  | 74(3)  | 36(2) | 46(2) | -10(2) | -3(2)  | -12(2) |
| C(35)  | 76(3)  | 34(2) | 61(2) | -8(2)  | -9(2)  | 1(2)   |
| C(36)  | 66(2)  | 34(2) | 48(2) | -2(2)  | -13(2) | 4(2)   |
| C(37)  | 42(2)  | 33(2) | 38(2) | -1(1)  | -7(1)  | -7(1)  |
| C(38)  | 35(2)  | 31(2) | 34(2) | -2(1)  | -3(1)  | -9(1)  |
| O(41)  | 102(6) | 66(4) | 52(3) | -4(3)  | -33(4) | -27(4) |
| C(41)  | 103(6) | 90(5) | 58(4) | -6(4)  | -10(5) | -47(5) |
| C(42)  | 105(7) | 95(6) | 78(6) | -18(5) | 5(5)   | -61(5) |
| C(43)  | 45(4)  | 63(4) | 70(4) | -25(3) | 5(4)   | -18(3) |
| C(44)  | 46(4)  | 60(4) | 81(4) | -20(4) | 3(4)   | -12(4) |
| O(41A) | 83(6)  | 44(4) | 70(5) | -2(3)  | 12(5)  | -13(4) |
| C(41A) | 89(6)  | 48(5) | 75(5) | -9(4)  | 8(5)   | -29(4) |

|        |        |        |        |        |        |        |
|--------|--------|--------|--------|--------|--------|--------|
| C(42A) | 82(7)  | 55(5)  | 93(6)  | 13(5)  | -26(5) | -16(5) |
| C(43A) | 128(8) | 70(5)  | 83(6)  | -7(5)  | -19(6) | -10(6) |
| C(44A) | 114(9) | 61(5)  | 71(5)  | 6(4)   | -21(6) | -2(6)  |
| O(51)  | 95(5)  | 64(4)  | 79(4)  | -5(3)  | -3(4)  | 8(4)   |
| C(51)  | 69(5)  | 74(6)  | 77(6)  | -6(6)  | -14(5) | 2(5)   |
| C(52)  | 70(5)  | 98(7)  | 91(6)  | -12(6) | -29(5) | 2(5)   |
| C(53)  | 71(6)  | 148(9) | 128(7) | 7(7)   | -31(6) | -2(6)  |
| C(54)  | 70(5)  | 101(7) | 137(7) | -27(6) | 13(5)  | 1(5)   |
| O(51A) | 65(4)  | 61(4)  | 70(4)  | 1(3)   | -11(3) | -12(3) |
| C(51A) | 72(5)  | 100(8) | 80(6)  | -2(6)  | -17(4) | -24(5) |
| C(52A) | 58(4)  | 82(6)  | 101(6) | -1(5)  | -25(4) | -3(5)  |
| C(53A) | 73(5)  | 121(7) | 81(5)  | 12(6)  | -8(4)  | -2(6)  |
| C(54A) | 67(5)  | 69(6)  | 79(6)  | 1(6)   | -15(5) | -6(5)  |

**Table S33.** Hydrogen coordinates ( $\times 10^4$ ) and isotropic displacement parameters ( $\text{\AA}^2 \times 10^3$ ) for  $[\text{Cr}(\text{BQA})_2]$ .

|       | x     | y    | z    | U(eq) |
|-------|-------|------|------|-------|
| H(1)  | -34   | 6771 | 3281 | 41    |
| H(2)  | -2084 | 5916 | 4138 | 49    |
| H(3)  | -1615 | 4099 | 4605 | 49    |
| H(5)  | 294   | 2350 | 4650 | 54    |
| H(6)  | 2732  | 1493 | 4169 | 51    |
| H(7)  | 4704  | 2411 | 3363 | 47    |
| H(10) | 5611  | 7719 | 1381 | 43    |
| H(11) | 8275  | 7729 | 963  | 50    |
| H(12) | 9958  | 6218 | 1216 | 48    |
| H(14) | 10366 | 4245 | 1854 | 44    |
| H(15) | 9300  | 2747 | 2522 | 44    |
| H(16) | 6657  | 2843 | 3088 | 38    |
| H(1A) | 59    | 6965 | 3118 | 44    |
| H(2A) | -2137 | 6279 | 3954 | 52    |
| H(3A) | -1912 | 4490 | 4540 | 49    |
| H(5A) | -200  | 2654 | 4686 | 51    |
| H(6A) | 2186  | 1692 | 4413 | 58    |
| H(7A) | 4318  | 2422 | 3568 | 51    |

|        |       |       |      |     |
|--------|-------|-------|------|-----|
| H(10A) | 5908  | 7632  | 1613 | 40  |
| H(11A) | 8601  | 7441  | 1112 | 53  |
| H(12A) | 10085 | 5816  | 1318 | 48  |
| H(14A) | 10273 | 3839  | 1934 | 42  |
| H(15A) | 8977  | 2452  | 2644 | 49  |
| H(16A) | 6323  | 2632  | 2968 | 38  |
| H(21)  | 3628  | 4432  | 1277 | 47  |
| H(22)  | 3159  | 4516  | -102 | 57  |
| H(23)  | 2343  | 6158  | -820 | 60  |
| H(25)  | 1625  | 8188  | -814 | 70  |
| H(26)  | 1360  | 9657  | -107 | 75  |
| H(27)  | 1776  | 9509  | 1289 | 65  |
| H(30)  | 4986  | 5547  | 4163 | 42  |
| H(31)  | 4993  | 6421  | 5332 | 48  |
| H(32)  | 3552  | 8109  | 5504 | 53  |
| H(34)  | 1782  | 9704  | 4888 | 63  |
| H(35)  | 618   | 10465 | 3773 | 70  |
| H(36)  | 959   | 9622  | 2540 | 62  |
| H(41A) | 2059  | 11055 | 6084 | 97  |
| H(41B) | 3845  | 10667 | 5652 | 97  |
| H(42A) | 4598  | 10785 | 6947 | 109 |
| H(42B) | 3364  | 11870 | 6852 | 109 |
| H(43A) | 2683  | 10532 | 8193 | 71  |
| H(43B) | 1338  | 11054 | 7693 | 71  |
| H(44A) | 2955  | 8950  | 7710 | 77  |
| H(44B) | 1250  | 9361  | 7551 | 77  |
| H(41C) | 4145  | 10388 | 5624 | 87  |
| H(41D) | 5128  | 10216 | 6357 | 87  |
| H(42C) | 3262  | 11942 | 6572 | 92  |
| H(42D) | 1830  | 11268 | 6713 | 92  |
| H(43C) | 4502  | 10472 | 7517 | 114 |
| H(43D) | 2815  | 10898 | 8090 | 114 |
| H(44C) | 3170  | 8956  | 7874 | 102 |
| H(44D) | 1677  | 9666  | 7589 | 102 |
| H(51A) | 915   | 11653 | 1233 | 91  |
| H(51B) | 1636  | 12671 | 677  | 91  |
| H(52A) | 2789  | 12799 | 1715 | 104 |
| H(52B) | 2008  | 11806 | 2289 | 104 |
| H(53A) | 4973  | 11695 | 1538 | 143 |

|        |      |       |      |     |
|--------|------|-------|------|-----|
| H(53B) | 4115 | 10670 | 1920 | 143 |
| H(54A) | 5003 | 11517 | 224  | 132 |
| H(54B) | 4728 | 10311 | 600  | 132 |
| H(51C) | 2860 | 11202 | 2429 | 100 |
| H(51D) | 2243 | 12450 | 2207 | 100 |
| H(52C) | 4534 | 12590 | 1356 | 97  |
| H(52D) | 5027 | 11301 | 1437 | 97  |
| H(53C) | 4335 | 11209 | 239  | 117 |
| H(53D) | 4139 | 12501 | 77   | 117 |
| H(54C) | 1617 | 12695 | 629  | 89  |
| H(54D) | 1808 | 11534 | 314  | 89  |

---

## [Cr(BQA)<sub>2</sub>]Cl

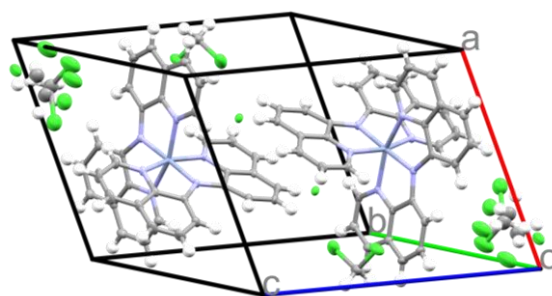

**Fig. S25** Unit cell with complete molecules of [Cr(BQA)<sub>2</sub>]Cl

The unit cell of [Cr(BQA)<sub>2</sub>]Cl was determined using 9988 reflections and the structure was solved in the triclinic space group  $P\bar{1}$ . The asymmetric unit contains one [Cr(BQA)<sub>2</sub>], the chloride anion and two dichloromethane molecules. One of the solvent molecules was found to be disordered over three positions. The disorder was refined with the help of similarity restraints on 1,2- and 1,3 distances and ADP similarity restraints. The thermal displacement parameters of equivalent atoms of the disordered solvent molecule were set to the same parameters. [7,8] The disorder ratio was allowed to refine and converged to 0.593(2), 0.337(2) and 0.071(2).

**Table S19.** Crystal data and structure refinement for [Cr(BQA)<sub>2</sub>]Cl.

|                                 |                                                                   |                                                                                 |
|---------------------------------|-------------------------------------------------------------------|---------------------------------------------------------------------------------|
| CCDC No.                        | 1897893                                                           |                                                                                 |
| Empirical formula               | C <sub>38</sub> H <sub>28</sub> Cl <sub>5</sub> Cr N <sub>6</sub> |                                                                                 |
| Formula weight                  | 797.91                                                            |                                                                                 |
| Temperature                     | 100(2) K                                                          |                                                                                 |
| Wavelength                      | 0.71073 Å                                                         |                                                                                 |
| Crystal system                  | Triclinic                                                         |                                                                                 |
| Space group                     | $P\bar{1}$                                                        |                                                                                 |
| Unit cell dimensions            | a = 10.7738(4) Å<br>b = 11.6879(5) Å<br>c = 15.3294(6) Å          | $\alpha$ = 80.5576(14)°.<br>$\beta$ = 78.3853(14)°.<br>$\gamma$ = 68.2652(14)°. |
| Volume                          | 1747.86(12) Å <sup>3</sup>                                        |                                                                                 |
| Z                               | 2                                                                 |                                                                                 |
| Density (calculated)            | 1.516 Mg/m <sup>3</sup>                                           |                                                                                 |
| Absorption coefficient          | 0.749 mm <sup>-1</sup>                                            |                                                                                 |
| $F(000)$                        | 814                                                               |                                                                                 |
| Crystal size                    | 0.982 x 0.032 x 0.028 mm <sup>3</sup>                             |                                                                                 |
| Theta range for data collection | 2.215 to 27.103°.                                                 |                                                                                 |
| Index ranges                    | -13 ≤ h ≤ 13, -14 ≤ k ≤ 14, -19 ≤ l ≤ 19                          |                                                                                 |
| Reflections collected           | 89998                                                             |                                                                                 |
| Independent reflections         | 7699 [R(int) = 0.1164]                                            |                                                                                 |



|                                      |                                    |
|--------------------------------------|------------------------------------|
| Completeness to theta = 25.242°      | 99.9 %                             |
| Absorption correction                | Semi-empirical from equivalents    |
| Refinement method                    | Full-matrix least-squares on $F^2$ |
| Data / restraints / parameters       | 7699 / 157 / 478                   |
| Goodness-of-fit on $F^2$             | 1.045                              |
| Final R indices [ $I > 2\sigma(I)$ ] | R1 = 0.0543, wR2 = 0.1228          |
| R indices (all data)                 | R1 = 0.0766, wR2 = 0.1323          |
| Largest diff. peak and hole          | 0.942 and -1.309 e.Å <sup>-3</sup> |

**Table S20.** Atomic coordinates (  $\times 10^4$ ) and equivalent isotropic displacement parameters ( $\text{Å}^2 \times 10^3$ ) for  $[\text{Cr}(\text{BQA})_2]\text{Cl}$ . U(eq) is defined as one third of the trace of the orthogonalized  $U_{ij}$  tensor.

|       | x       | y        | z       | U(eq) |
|-------|---------|----------|---------|-------|
| Cr(1) | 4635(1) | 7507(1)  | 7468(1) | 11(1) |
| N(1)  | 6637(2) | 6448(2)  | 7278(2) | 14(1) |
| N(2)  | 5425(2) | 8789(2)  | 7464(2) | 14(1) |
| N(3)  | 2899(2) | 9010(2)  | 7651(2) | 16(1) |
| N(21) | 4601(2) | 7630(2)  | 6126(2) | 14(1) |
| N(22) | 3761(2) | 6277(2)  | 7475(2) | 14(1) |
| N(23) | 4379(3) | 6968(2)  | 8808(2) | 16(1) |
| C(1)  | 7180(3) | 5244(3)  | 7196(2) | 16(1) |
| C(2)  | 8569(3) | 4633(3)  | 7001(2) | 22(1) |
| C(3)  | 9412(3) | 5300(3)  | 6867(2) | 24(1) |
| C(4)  | 8883(3) | 6589(3)  | 6936(2) | 19(1) |
| C(5)  | 9671(3) | 7360(3)  | 6761(2) | 24(1) |
| C(6)  | 9034(3) | 8610(3)  | 6794(2) | 24(1) |
| C(7)  | 7626(3) | 9156(3)  | 7029(2) | 19(1) |
| C(8)  | 6811(3) | 8438(3)  | 7236(2) | 14(1) |
| C(9)  | 7466(3) | 7136(3)  | 7155(2) | 15(1) |
| C(10) | 4523(3) | 9949(3)  | 7664(2) | 14(1) |
| C(11) | 4768(3) | 10984(3) | 7813(2) | 18(1) |
| C(12) | 3693(3) | 12095(3) | 7990(2) | 21(1) |
| C(13) | 2376(3) | 12212(3) | 8037(2) | 22(1) |
| C(14) | 2063(3) | 11180(3) | 7924(2) | 19(1) |

|        |          |           |           |       |
|--------|----------|-----------|-----------|-------|
| C(15)  | 739(3)   | 11192(3)  | 7974(2)   | 26(1) |
| C(16)  | 524(3)   | 10144(3)  | 7867(2)   | 26(1) |
| C(17)  | 1635(3)  | 9058(3)   | 7717(2)   | 21(1) |
| C(18)  | 3134(3)  | 10058(3)  | 7745(2)   | 15(1) |
| C(21)  | 5097(3)  | 8315(3)   | 5475(2)   | 19(1) |
| C(22)  | 4992(3)  | 8331(3)   | 4575(2)   | 22(1) |
| C(23)  | 4360(3)  | 7622(3)   | 4355(2)   | 21(1) |
| C(24)  | 3853(3)  | 6853(3)   | 5028(2)   | 18(1) |
| C(25)  | 3279(3)  | 6025(3)   | 4846(2)   | 21(1) |
| C(26)  | 2968(3)  | 5218(3)   | 5523(2)   | 22(1) |
| C(27)  | 3137(3)  | 5219(3)   | 6415(2)   | 18(1) |
| C(28)  | 3589(3)  | 6078(3)   | 6645(2)   | 15(1) |
| C(29)  | 4007(3)  | 6873(3)   | 5920(2)   | 14(1) |
| C(30)  | 3201(3)  | 5881(3)   | 8309(2)   | 16(1) |
| C(31)  | 2305(3)  | 5243(3)   | 8535(2)   | 23(1) |
| C(32)  | 1836(4)  | 4935(3)   | 9437(2)   | 30(1) |
| C(33)  | 2221(4)  | 5263(3)   | 10129(2)  | 31(1) |
| C(34)  | 3096(3)  | 5957(3)   | 9938(2)   | 23(1) |
| C(35)  | 3506(4)  | 6402(3)   | 10594(2)  | 32(1) |
| C(36)  | 4337(4)  | 7075(3)   | 10355(2)  | 31(1) |
| C(37)  | 4763(3)  | 7345(3)   | 9447(2)   | 24(1) |
| C(38)  | 3569(3)  | 6261(3)   | 9033(2)   | 18(1) |
| Cl(41) | 1542(1)  | 10044(1)  | 5440(1)   | 41(1) |
| Cl(42) | 1192(1)  | 12615(1)  | 5515(1)   | 57(1) |
| C(41)  | 353(4)   | 11565(3)  | 5563(3)   | 33(1) |
| Cl(51) | 869(3)   | 11889(3)  | 10629(2)  | 67(1) |
| Cl(52) | 3701(2)  | 10448(2)  | 10131(1)  | 56(1) |
| C(51)  | 2120(9)  | 10339(10) | 10520(8)  | 51(2) |
| Cl(53) | 1451(3)  | 9502(3)   | 9963(2)   | 32(1) |
| Cl(54) | 1595(5)  | 11692(5)  | 10614(4)  | 67(1) |
| C(51A) | 2511(16) | 10165(16) | 10339(16) | 51(2) |
| Cl(55) | 166(18)  | 11637(17) | 10149(13) | 67(1) |
| Cl(56) | 2755(19) | 10723(17) | 10593(12) | 56(1) |
| C(51B) | 1620(30) | 10230(30) | 10220(50) | 51(2) |
| Cl(1)  | -2585(1) | 12180(1)  | 7434(1)   | 19(1) |

---

**Table S21.** Bond lengths [ $\text{\AA}$ ] and angles [ $^\circ$ ] for  $[\text{Cr}(\text{BQA})_2]\text{Cl}$ .

|             |          |             |          |
|-------------|----------|-------------|----------|
| Cr(1)-N(2)  | 1.978(2) | C(12)-H(12) | 0.9500   |
| Cr(1)-N(22) | 1.986(2) | C(13)-C(14) | 1.412(4) |
| Cr(1)-N(1)  | 2.039(2) | C(13)-H(13) | 0.9500   |
| Cr(1)-N(23) | 2.042(2) | C(14)-C(15) | 1.408(5) |
| Cr(1)-N(3)  | 2.045(2) | C(14)-C(18) | 1.413(4) |
| Cr(1)-N(21) | 2.045(2) | C(15)-C(16) | 1.369(5) |
| N(1)-C(1)   | 1.325(4) | C(15)-H(15) | 0.9500   |
| N(1)-C(9)   | 1.377(4) | C(16)-C(17) | 1.399(4) |
| N(2)-C(8)   | 1.380(4) | C(16)-H(16) | 0.9500   |
| N(2)-C(10)  | 1.384(4) | C(17)-H(17) | 0.9500   |
| N(3)-C(17)  | 1.325(4) | C(21)-C(22) | 1.403(4) |
| N(3)-C(18)  | 1.374(4) | C(21)-H(21) | 0.9500   |
| N(21)-C(21) | 1.328(4) | C(22)-C(23) | 1.366(5) |
| N(21)-C(29) | 1.373(4) | C(22)-H(22) | 0.9500   |
| N(22)-C(30) | 1.384(4) | C(23)-C(24) | 1.415(4) |
| N(22)-C(28) | 1.390(4) | C(23)-H(23) | 0.9500   |
| N(23)-C(37) | 1.328(4) | C(24)-C(25) | 1.413(4) |
| N(23)-C(38) | 1.372(4) | C(24)-C(29) | 1.415(4) |
| C(1)-C(2)   | 1.392(4) | C(25)-C(26) | 1.362(5) |
| C(1)-H(1)   | 0.9500   | C(25)-H(25) | 0.9500   |
| C(2)-C(3)   | 1.368(4) | C(26)-C(27) | 1.415(4) |
| C(2)-H(2)   | 0.9500   | C(26)-H(26) | 0.9500   |
| C(3)-C(4)   | 1.414(4) | C(27)-C(28) | 1.385(4) |
| C(3)-H(3)   | 0.9500   | C(27)-H(27) | 0.9500   |
| C(4)-C(9)   | 1.412(4) | C(28)-C(29) | 1.439(4) |
| C(4)-C(5)   | 1.414(4) | C(30)-C(31) | 1.386(4) |
| C(5)-C(6)   | 1.370(5) | C(30)-C(38) | 1.434(4) |
| C(5)-H(5)   | 0.9500   | C(31)-C(32) | 1.409(5) |
| C(6)-C(7)   | 1.406(4) | C(31)-H(31) | 0.9500   |
| C(6)-H(6)   | 0.9500   | C(32)-C(33) | 1.369(5) |
| C(7)-C(8)   | 1.387(4) | C(32)-H(32) | 0.9500   |
| C(7)-H(7)   | 0.9500   | C(33)-C(34) | 1.417(5) |
| C(8)-C(9)   | 1.436(4) | C(33)-H(33) | 0.9500   |
| C(10)-C(11) | 1.392(4) | C(34)-C(35) | 1.413(5) |
| C(10)-C(18) | 1.436(4) | C(34)-C(38) | 1.413(4) |
| C(11)-C(12) | 1.406(4) | C(35)-C(36) | 1.360(5) |
| C(11)-H(11) | 0.9500   | C(35)-H(35) | 0.9500   |
| C(12)-C(13) | 1.362(5) | C(36)-C(37) | 1.397(5) |

|                   |            |                   |            |
|-------------------|------------|-------------------|------------|
| C(36)-H(36)       | 0.9500     | C(10)-N(2)-Cr(1)  | 116.46(19) |
| C(37)-H(37)       | 0.9500     | C(17)-N(3)-C(18)  | 119.2(3)   |
| Cl(41)-C(41)      | 1.779(4)   | C(17)-N(3)-Cr(1)  | 127.9(2)   |
| Cl(42)-C(41)      | 1.757(4)   | C(18)-N(3)-Cr(1)  | 112.87(19) |
| C(41)-H(41A)      | 0.9900     | C(21)-N(21)-C(29) | 119.6(2)   |
| C(41)-H(41B)      | 0.9900     | C(21)-N(21)-Cr(1) | 127.6(2)   |
| Cl(51)-C(51)      | 1.824(10)  | C(29)-N(21)-Cr(1) | 112.70(18) |
| Cl(52)-C(51)      | 1.733(8)   | C(30)-N(22)-C(28) | 127.4(2)   |
| C(51)-H(51A)      | 0.9900     | C(30)-N(22)-Cr(1) | 115.49(19) |
| C(51)-H(51B)      | 0.9900     | C(28)-N(22)-Cr(1) | 116.12(18) |
| Cl(53)-C(51A)     | 1.818(15)  | C(37)-N(23)-C(38) | 119.8(3)   |
| Cl(54)-C(51A)     | 1.764(14)  | C(37)-N(23)-Cr(1) | 127.3(2)   |
| C(51A)-H(51C)     | 0.9900     | C(38)-N(23)-Cr(1) | 112.31(19) |
| C(51A)-H(51D)     | 0.9900     | N(1)-C(1)-C(2)    | 122.6(3)   |
| Cl(55)-C(51B)     | 1.810(18)  | N(1)-C(1)-H(1)    | 118.7      |
| Cl(56)-C(51B)     | 1.755(18)  | C(2)-C(1)-H(1)    | 118.7      |
| C(51B)-H(51E)     | 0.9900     | C(3)-C(2)-C(1)    | 119.1(3)   |
| C(51B)-H(51F)     | 0.9900     | C(3)-C(2)-H(2)    | 120.5      |
|                   |            | C(1)-C(2)-H(2)    | 120.5      |
| N(2)-Cr(1)-N(22)  | 177.44(10) | C(2)-C(3)-C(4)    | 120.5(3)   |
| N(2)-Cr(1)-N(1)   | 80.51(10)  | C(2)-C(3)-H(3)    | 119.7      |
| N(22)-Cr(1)-N(1)  | 102.04(10) | C(4)-C(3)-H(3)    | 119.7      |
| N(2)-Cr(1)-N(23)  | 99.77(10)  | C(9)-C(4)-C(5)    | 118.7(3)   |
| N(22)-Cr(1)-N(23) | 80.39(10)  | C(9)-C(4)-C(3)    | 116.9(3)   |
| N(1)-Cr(1)-N(23)  | 93.73(10)  | C(5)-C(4)-C(3)    | 124.3(3)   |
| N(2)-Cr(1)-N(3)   | 80.42(10)  | C(6)-C(5)-C(4)    | 119.0(3)   |
| N(22)-Cr(1)-N(3)  | 97.03(10)  | C(6)-C(5)-H(5)    | 120.5      |
| N(1)-Cr(1)-N(3)   | 160.92(10) | C(4)-C(5)-H(5)    | 120.5      |
| N(23)-Cr(1)-N(3)  | 89.76(10)  | C(5)-C(6)-C(7)    | 122.5(3)   |
| N(2)-Cr(1)-N(21)  | 99.04(10)  | C(5)-C(6)-H(6)    | 118.7      |
| N(22)-Cr(1)-N(21) | 80.78(10)  | C(7)-C(6)-H(6)    | 118.7      |
| N(1)-Cr(1)-N(21)  | 90.08(9)   | C(8)-C(7)-C(6)    | 120.8(3)   |
| N(23)-Cr(1)-N(21) | 161.17(10) | C(8)-C(7)-H(7)    | 119.6      |
| N(3)-Cr(1)-N(21)  | 92.64(10)  | C(6)-C(7)-H(7)    | 119.6      |
| C(1)-N(1)-C(9)    | 119.4(3)   | N(2)-C(8)-C(7)    | 129.8(3)   |
| C(1)-N(1)-Cr(1)   | 127.7(2)   | N(2)-C(8)-C(9)    | 113.3(2)   |
| C(9)-N(1)-Cr(1)   | 112.72(18) | C(7)-C(8)-C(9)    | 116.8(3)   |
| C(8)-N(2)-C(10)   | 127.2(2)   | N(1)-C(9)-C(4)    | 121.4(3)   |
| C(8)-N(2)-Cr(1)   | 116.31(18) | N(1)-C(9)-C(8)    | 116.5(3)   |

|                   |          |                   |          |
|-------------------|----------|-------------------|----------|
| C(4)-C(9)-C(8)    | 122.0(3) | C(29)-C(24)-C(23) | 117.5(3) |
| N(2)-C(10)-C(11)  | 129.8(3) | C(26)-C(25)-C(24) | 119.1(3) |
| N(2)-C(10)-C(18)  | 113.2(2) | C(26)-C(25)-H(25) | 120.5    |
| C(11)-C(10)-C(18) | 116.9(3) | C(24)-C(25)-H(25) | 120.5    |
| C(10)-C(11)-C(12) | 120.7(3) | C(25)-C(26)-C(27) | 122.2(3) |
| C(10)-C(11)-H(11) | 119.7    | C(25)-C(26)-H(26) | 118.9    |
| C(12)-C(11)-H(11) | 119.7    | C(27)-C(26)-H(26) | 118.9    |
| C(13)-C(12)-C(11) | 122.4(3) | C(28)-C(27)-C(26) | 121.1(3) |
| C(13)-C(12)-H(12) | 118.8    | C(28)-C(27)-H(27) | 119.4    |
| C(11)-C(12)-H(12) | 118.8    | C(26)-C(27)-H(27) | 119.4    |
| C(12)-C(13)-C(14) | 119.4(3) | C(27)-C(28)-N(22) | 130.3(3) |
| C(12)-C(13)-H(13) | 120.3    | C(27)-C(28)-C(29) | 116.5(3) |
| C(14)-C(13)-H(13) | 120.3    | N(22)-C(28)-C(29) | 113.2(2) |
| C(15)-C(14)-C(13) | 124.1(3) | N(21)-C(29)-C(24) | 121.2(3) |
| C(15)-C(14)-C(18) | 117.2(3) | N(21)-C(29)-C(28) | 117.1(2) |
| C(13)-C(14)-C(18) | 118.7(3) | C(24)-C(29)-C(28) | 121.7(3) |
| C(16)-C(15)-C(14) | 120.4(3) | N(22)-C(30)-C(31) | 129.8(3) |
| C(16)-C(15)-H(15) | 119.8    | N(22)-C(30)-C(38) | 113.3(3) |
| C(14)-C(15)-H(15) | 119.8    | C(31)-C(30)-C(38) | 116.8(3) |
| C(15)-C(16)-C(17) | 119.2(3) | C(30)-C(31)-C(32) | 121.1(3) |
| C(15)-C(16)-H(16) | 120.4    | C(30)-C(31)-H(31) | 119.4    |
| C(17)-C(16)-H(16) | 120.4    | C(32)-C(31)-H(31) | 119.4    |
| N(3)-C(17)-C(16)  | 122.4(3) | C(33)-C(32)-C(31) | 122.0(3) |
| N(3)-C(17)-H(17)  | 118.8    | C(33)-C(32)-H(32) | 119.0    |
| C(16)-C(17)-H(17) | 118.8    | C(31)-C(32)-H(32) | 119.0    |
| N(3)-C(18)-C(14)  | 121.7(3) | C(32)-C(33)-C(34) | 119.3(3) |
| N(3)-C(18)-C(10)  | 116.6(3) | C(32)-C(33)-H(33) | 120.3    |
| C(14)-C(18)-C(10) | 121.7(3) | C(34)-C(33)-H(33) | 120.3    |
| N(21)-C(21)-C(22) | 122.2(3) | C(35)-C(34)-C(38) | 117.0(3) |
| N(21)-C(21)-H(21) | 118.9    | C(35)-C(34)-C(33) | 124.4(3) |
| C(22)-C(21)-H(21) | 118.9    | C(38)-C(34)-C(33) | 118.5(3) |
| C(23)-C(22)-C(21) | 119.4(3) | C(36)-C(35)-C(34) | 120.9(3) |
| C(23)-C(22)-H(22) | 120.3    | C(36)-C(35)-H(35) | 119.6    |
| C(21)-C(22)-H(22) | 120.3    | C(34)-C(35)-H(35) | 119.6    |
| C(22)-C(23)-C(24) | 120.0(3) | C(35)-C(36)-C(37) | 119.0(3) |
| C(22)-C(23)-H(23) | 120.0    | C(35)-C(36)-H(36) | 120.5    |
| C(24)-C(23)-H(23) | 120.0    | C(37)-C(36)-H(36) | 120.5    |
| C(25)-C(24)-C(29) | 119.0(3) | N(23)-C(37)-C(36) | 122.1(3) |
| C(25)-C(24)-C(23) | 123.4(3) | N(23)-C(37)-H(37) | 118.9    |

|                     |          |                      |           |
|---------------------|----------|----------------------|-----------|
| C(36)-C(37)-H(37)   | 118.9    | Cl(51)-C(51)-H(51B)  | 109.8     |
| N(23)-C(38)-C(34)   | 121.1(3) | H(51A)-C(51)-H(51B)  | 108.3     |
| N(23)-C(38)-C(30)   | 116.8(3) | Cl(54)-C(51A)-Cl(53) | 111.5(9)  |
| C(34)-C(38)-C(30)   | 122.1(3) | Cl(54)-C(51A)-H(51C) | 109.3     |
| Cl(42)-C(41)-Cl(41) | 110.4(2) | Cl(53)-C(51A)-H(51C) | 109.3     |
| Cl(42)-C(41)-H(41A) | 109.6    | Cl(54)-C(51A)-H(51D) | 109.3     |
| Cl(41)-C(41)-H(41A) | 109.6    | Cl(53)-C(51A)-H(51D) | 109.3     |
| Cl(42)-C(41)-H(41B) | 109.6    | H(51C)-C(51A)-H(51D) | 108.0     |
| Cl(41)-C(41)-H(41B) | 109.6    | Cl(56)-C(51B)-Cl(55) | 102.3(15) |
| H(41A)-C(41)-H(41B) | 108.1    | Cl(56)-C(51B)-H(51E) | 111.3     |
| Cl(52)-C(51)-Cl(51) | 109.2(6) | Cl(55)-C(51B)-H(51E) | 111.3     |
| Cl(52)-C(51)-H(51A) | 109.8    | Cl(56)-C(51B)-H(51F) | 111.3     |
| Cl(51)-C(51)-H(51A) | 109.8    | Cl(55)-C(51B)-H(51F) | 111.3     |
| Cl(52)-C(51)-H(51B) | 109.8    | H(51E)-C(51B)-H(51F) | 109.2     |

---

**Table S22.** Anisotropic displacement parameters ( $\text{\AA}^2 \times 10^3$ ) for  $[\text{Cr}(\text{BQA})_2]\text{Cl}$ . The anisotropic displacement factor exponent takes the form:

$$-2p^2 [ h^2 a^*2U^{11} + \dots + 2 h k a^* b^* U^{12} ]$$

|       | U <sup>11</sup> | U <sup>22</sup> | U <sup>33</sup> | U <sup>23</sup> | U <sup>13</sup> | U <sup>12</sup> |
|-------|-----------------|-----------------|-----------------|-----------------|-----------------|-----------------|
| Cr(1) | 16(1)           | 10(1)           | 10(1)           | -1(1)           | -3(1)           | -6(1)           |
| N(1)  | 19(1)           | 13(1)           | 11(1)           | -1(1)           | -3(1)           | -7(1)           |
| N(2)  | 19(1)           | 11(1)           | 14(1)           | -1(1)           | -4(1)           | -6(1)           |
| N(3)  | 19(1)           | 12(1)           | 15(1)           | -1(1)           | -2(1)           | -5(1)           |
| N(21) | 17(1)           | 14(1)           | 12(1)           | -2(1)           | -2(1)           | -6(1)           |
| N(22) | 19(1)           | 15(1)           | 12(1)           | -1(1)           | -1(1)           | -8(1)           |
| N(23) | 21(1)           | 13(1)           | 14(1)           | -1(1)           | -4(1)           | -6(1)           |
| C(1)  | 24(2)           | 14(1)           | 13(1)           | 1(1)            | -4(1)           | -10(1)          |
| C(2)  | 23(2)           | 13(2)           | 26(2)           | -3(1)           | -5(1)           | -3(1)           |
| C(3)  | 20(2)           | 19(2)           | 31(2)           | -2(1)           | -5(1)           | -4(1)           |
| C(4)  | 20(2)           | 17(2)           | 21(2)           | -2(1)           | -6(1)           | -6(1)           |
| C(5)  | 16(2)           | 23(2)           | 34(2)           | -7(1)           | -1(1)           | -9(1)           |
| C(6)  | 21(2)           | 25(2)           | 31(2)           | -6(1)           | -2(1)           | -14(1)          |
| C(7)  | 24(2)           | 13(1)           | 22(2)           | -4(1)           | -4(1)           | -7(1)           |
| C(8)  | 20(2)           | 14(1)           | 10(1)           | -2(1)           | -5(1)           | -6(1)           |
| C(9)  | 19(2)           | 15(1)           | 13(1)           | -1(1)           | -4(1)           | -7(1)           |
| C(10) | 21(2)           | 13(1)           | 7(1)            | -1(1)           | -2(1)           | -6(1)           |
| C(11) | 24(2)           | 16(2)           | 16(1)           | 0(1)            | -6(1)           | -8(1)           |
| C(12) | 31(2)           | 14(2)           | 21(2)           | -2(1)           | -6(1)           | -11(1)          |
| C(13) | 25(2)           | 13(2)           | 27(2)           | -4(1)           | -4(1)           | -3(1)           |
| C(14) | 24(2)           | 14(2)           | 16(1)           | -2(1)           | -3(1)           | -5(1)           |
| C(15) | 21(2)           | 21(2)           | 30(2)           | -3(1)           | -2(1)           | -2(1)           |
| C(16) | 17(2)           | 28(2)           | 35(2)           | -4(2)           | -4(1)           | -8(1)           |
| C(17) | 21(2)           | 17(2)           | 25(2)           | -3(1)           | -3(1)           | -6(1)           |
| C(18) | 21(2)           | 12(1)           | 11(1)           | 1(1)            | -4(1)           | -5(1)           |
| C(21) | 23(2)           | 18(2)           | 17(2)           | 1(1)            | -3(1)           | -9(1)           |
| C(22) | 28(2)           | 22(2)           | 12(1)           | 3(1)            | -2(1)           | -8(1)           |
| C(23) | 24(2)           | 22(2)           | 13(1)           | -2(1)           | -4(1)           | -2(1)           |
| C(24) | 17(2)           | 16(2)           | 17(1)           | -4(1)           | -4(1)           | -1(1)           |
| C(25) | 20(2)           | 24(2)           | 18(2)           | -8(1)           | -6(1)           | -4(1)           |
| C(26) | 21(2)           | 22(2)           | 27(2)           | -12(1)          | -4(1)           | -8(1)           |
| C(27) | 19(2)           | 17(2)           | 20(2)           | -4(1)           | -2(1)           | -6(1)           |
| C(28) | 15(1)           | 13(1)           | 16(1)           | -5(1)           | -1(1)           | -4(1)           |

|        |       |       |       |        |        |        |
|--------|-------|-------|-------|--------|--------|--------|
| C(29)  | 14(1) | 14(1) | 13(1) | -2(1)  | -2(1)  | -3(1)  |
| C(30)  | 18(1) | 12(1) | 16(1) | -3(1)  | 1(1)   | -4(1)  |
| C(31)  | 26(2) | 19(2) | 25(2) | -7(1)  | 3(1)   | -11(1) |
| C(32)  | 34(2) | 25(2) | 31(2) | -4(1)  | 10(2)  | -19(2) |
| C(33)  | 45(2) | 26(2) | 19(2) | 1(1)   | 7(2)   | -17(2) |
| C(34)  | 33(2) | 16(2) | 16(2) | 0(1)   | 1(1)   | -6(1)  |
| C(35)  | 54(2) | 25(2) | 13(2) | 1(1)   | -2(2)  | -12(2) |
| C(36)  | 52(2) | 30(2) | 16(2) | -2(1)  | -12(2) | -16(2) |
| C(37)  | 33(2) | 23(2) | 18(2) | -2(1)  | -8(1)  | -11(1) |
| C(38)  | 22(2) | 12(1) | 16(1) | -1(1)  | -1(1)  | -4(1)  |
| Cl(41) | 32(1) | 42(1) | 35(1) | -2(1)  | -1(1)  | 1(1)   |
| Cl(42) | 62(1) | 69(1) | 52(1) | -29(1) | 18(1)  | -42(1) |
| C(41)  | 28(2) | 38(2) | 33(2) | -8(2)  | 0(2)   | -11(2) |
| Cl(51) | 67(2) | 54(1) | 62(1) | 4(1)   | 19(2)  | -20(2) |
| Cl(52) | 71(1) | 52(1) | 48(1) | 2(1)   | -7(1)  | -30(1) |
| C(51)  | 56(5) | 56(4) | 48(5) | 0(3)   | -1(4)  | -33(4) |
| Cl(53) | 36(1) | 42(2) | 14(1) | 2(1)   | -4(1)  | -8(1)  |
| Cl(54) | 67(2) | 54(1) | 62(1) | 4(1)   | 19(2)  | -20(2) |
| C(51A) | 56(5) | 56(4) | 48(5) | 0(3)   | -1(4)  | -33(4) |
| Cl(55) | 67(2) | 54(1) | 62(1) | 4(1)   | 19(2)  | -20(2) |
| Cl(56) | 71(1) | 52(1) | 48(1) | 2(1)   | -7(1)  | -30(1) |
| C(51B) | 56(5) | 56(4) | 48(5) | 0(3)   | -1(4)  | -33(4) |
| Cl(1)  | 21(1) | 17(1) | 21(1) | -4(1)  | -5(1)  | -9(1)  |

---



**Table S23.** Hydrogen coordinates ( $\times 10^4$ ) and isotropic displacement parameters ( $\text{\AA}^2 \times 10^3$ ) for  $[\text{Cr}(\text{BQA})_2]\text{Cl}$ .

|        | x     | y     | z     | U(eq) |
|--------|-------|-------|-------|-------|
| H(1)   | 6598  | 4779  | 7275  | 20    |
| H(2)   | 8926  | 3765  | 6960  | 26    |
| H(3)   | 10361 | 4893  | 6726  | 29    |
| H(5)   | 10628 | 7016  | 6622  | 29    |
| H(6)   | 9564  | 9128  | 6652  | 28    |
| H(7)   | 7228  | 10028 | 7046  | 22    |
| H(11)  | 5671  | 10940 | 7795  | 21    |
| H(12)  | 3892  | 12790 | 8081  | 25    |
| H(13)  | 1674  | 12982 | 8144  | 26    |
| H(15)  | -9    | 11932 | 8084  | 31    |
| H(16)  | -369  | 10155 | 7894  | 32    |
| H(17)  | 1478  | 8327  | 7661  | 25    |
| H(21)  | 5537  | 8810  | 5623  | 23    |
| H(22)  | 5357  | 8830  | 4123  | 26    |
| H(23)  | 4261  | 7645  | 3750  | 26    |
| H(25)  | 3112  | 6033  | 4259  | 25    |
| H(26)  | 2625  | 4634  | 5393  | 26    |
| H(27)  | 2938  | 4619  | 6863  | 22    |
| H(31)  | 2001  | 5010  | 8074  | 27    |
| H(32)  | 1234  | 4485  | 9568  | 36    |
| H(33)  | 1906  | 5028  | 10731 | 37    |
| H(35)  | 3196  | 6229  | 11209 | 38    |
| H(36)  | 4624  | 7358  | 10799 | 37    |
| H(37)  | 5346  | 7812  | 9282  | 28    |
| H(41A) | -212  | 11821 | 5081  | 40    |
| H(41B) | -249  | 11573 | 6144  | 40    |
| H(51A) | 2127  | 9839  | 11108 | 62    |
| H(51B) | 1885  | 9924  | 10096 | 62    |
| H(51C) | 2882  | 9647  | 10870 | 62    |
| H(51D) | 3280  | 10165 | 9860  | 62    |
| H(51E) | 1390  | 9580  | 10648 | 62    |
| H(51F) | 1993  | 9907  | 9624  | 62    |

## [Fe(BQA)<sub>2</sub>]

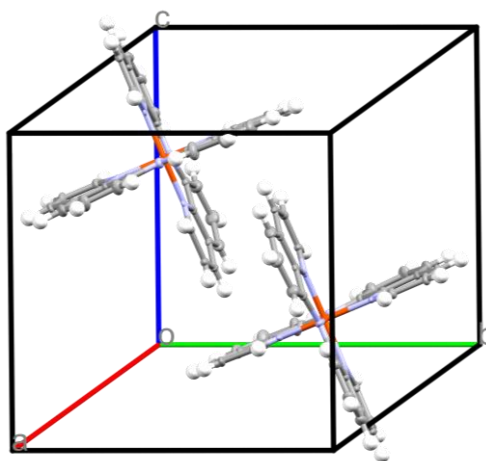

Fig. S26 Unit cell with complete molecules of Fe(BQA)<sub>2</sub>

The unit cell of [Fe(BQA)<sub>2</sub>] was determined using 9870 reflections and the structure was solved in the triclinic space group  $P\bar{1}$ . The asymmetric unit contains one molecule of [Fe(BQA)<sub>2</sub>] and heavily disordered solvent molecules. SQUEEZE was used to include a solvent model in the refinement. SQUEEZE identified one independent void with a size of 289 Å<sup>3</sup> at 0.0 0.5 0.5 in the unit cell. The equivalent of 98 electrons were found in the unit cell, which corresponds to about two molecules of DCM. The obtained model was added as .fab-file to the refinement using SHELXL.

**Table S24.** Crystal data and structure refinement for [Fe(BQA)<sub>2</sub>].

|                                 |                                                   |                               |
|---------------------------------|---------------------------------------------------|-------------------------------|
| CCDC No.                        | 1897891                                           |                               |
| Empirical formula               | C <sub>36</sub> H <sub>24</sub> Fe N <sub>6</sub> |                               |
| Formula weight                  | 596.46                                            |                               |
| Temperature                     | 100(2) K                                          |                               |
| Wavelength                      | 0.71073 Å                                         |                               |
| Crystal system                  | Triclinic                                         |                               |
| Space group                     | $P\bar{1}$                                        |                               |
| Unit cell dimensions            | a = 11.8578(15) Å                                 | $\alpha = 90.362(6)^\circ$ .  |
|                                 | b = 12.2367(15) Å                                 | $\beta = 101.553(5)^\circ$ .  |
|                                 | c = 12.2682(15) Å                                 | $\gamma = 116.949(5)^\circ$ . |
| Volume                          | 1545.0(3) Å <sup>3</sup>                          |                               |
| Z                               | 2                                                 |                               |
| Density (calculated)            | 1.282 Mg/m <sup>3</sup>                           |                               |
| Absorption coefficient          | 0.523 mm <sup>-1</sup>                            |                               |
| F(000)                          | 616                                               |                               |
| Crystal size                    | 0.664 x 0.375 x 0.006 mm <sup>3</sup>             |                               |
| Theta range for data collection | 2.299 to 26.732°.                                 |                               |

|                                 |                                          |
|---------------------------------|------------------------------------------|
| Index ranges                    | -15 ≤ h ≤ 14, -15 ≤ k ≤ 15, -15 ≤ l ≤ 15 |
| Reflections collected           | 43004                                    |
| Independent reflections         | 6492 [R(int) = 0.0848]                   |
| Completeness to theta = 25.242° | 99.3 %                                   |
| Absorption correction           | Semi-empirical from equivalents          |
| Refinement method               | Full-matrix least-squares on $F^2$       |
| Data / restraints / parameters  | 6492 / 0 / 388                           |
| Goodness-of-fit on $F^2$        | 1.078                                    |
| Final R indices [I > 2σ(I)]     | R1 = 0.0608, wR2 = 0.1245                |
| R indices (all data)            | R1 = 0.0816, wR2 = 0.1338                |
| Largest diff. peak and hole     | 0.693 and -0.908 e.Å <sup>-3</sup>       |

**Table S25.** Atomic coordinates (  $\times 10^4$ ) and equivalent isotropic displacement parameters ( $\text{\AA}^2 \times 10^3$ ) for [Fe(BQA)2]. U(eq) is defined as one third of the trace of the orthogonalized  $U_{ij}$  tensor.

|       | x       | y       | z       | U(eq) |
|-------|---------|---------|---------|-------|
| Fe(1) | 4779(1) | 2422(1) | 7462(1) | 14(1) |
| N(1)  | 5083(3) | 3996(2) | 8153(2) | 17(1) |
| N(2)  | 6637(3) | 3127(2) | 7937(2) | 17(1) |
| N(3)  | 4924(3) | 1020(2) | 6889(2) | 15(1) |
| N(21) | 4359(3) | 1638(2) | 8803(2) | 17(1) |
| N(22) | 2917(3) | 1727(2) | 6977(2) | 15(1) |
| N(23) | 4738(3) | 3020(2) | 5996(2) | 16(1) |
| C(1)  | 4218(4) | 4381(3) | 8218(3) | 20(1) |
| C(2)  | 4571(4) | 5563(3) | 8728(3) | 26(1) |
| C(3)  | 5836(4) | 6331(3) | 9188(3) | 26(1) |
| C(4)  | 6795(4) | 5959(3) | 9143(3) | 24(1) |
| C(5)  | 8133(4) | 6698(3) | 9593(3) | 33(1) |
| C(6)  | 8986(4) | 6259(4) | 9494(4) | 42(1) |
| C(7)  | 8566(4) | 5068(4) | 8959(3) | 37(1) |
| C(8)  | 7267(3) | 4300(3) | 8497(3) | 21(1) |
| C(9)  | 6373(3) | 4764(3) | 8606(2) | 20(1) |
| C(10) | 7168(3) | 2409(3) | 7629(3) | 20(1) |
| C(11) | 8442(4) | 2633(4) | 7780(3) | 32(1) |
| C(12) | 8753(4) | 1736(4) | 7379(3) | 34(1) |

|       |         |          |          |       |
|-------|---------|----------|----------|-------|
| C(13) | 7823(4) | 624(3)   | 6834(3)  | 28(1) |
| C(14) | 6511(4) | 338(3)   | 6660(2)  | 21(1) |
| C(15) | 5479(4) | -799(3)  | 6137(3)  | 24(1) |
| C(16) | 4230(4) | -1006(3) | 6010(3)  | 25(1) |
| C(17) | 3990(3) | -55(3)   | 6388(3)  | 20(1) |
| C(18) | 6194(3) | 1239(3)  | 7045(2)  | 16(1) |
| C(21) | 5172(4) | 1655(3)  | 9739(3)  | 22(1) |
| C(22) | 4718(4) | 1021(3)  | 10640(3) | 28(1) |
| C(23) | 3417(4) | 354(3)   | 10569(3) | 27(1) |
| C(24) | 2529(4) | 314(3)   | 9592(3)  | 24(1) |
| C(25) | 1167(4) | -339(3)  | 9448(3)  | 29(1) |
| C(26) | 393(4)  | -324(3)  | 8471(3)  | 30(1) |
| C(27) | 889(4)  | 338(3)   | 7604(3)  | 25(1) |
| C(28) | 2220(3) | 1022(3)  | 7704(2)  | 18(1) |
| C(29) | 3050(3) | 986(3)   | 8720(2)  | 17(1) |
| C(30) | 2466(3) | 2020(3)  | 5958(2)  | 18(1) |
| C(31) | 1226(4) | 1774(3)  | 5393(3)  | 27(1) |
| C(32) | 1008(4) | 2171(4)  | 4329(3)  | 34(1) |
| C(33) | 1983(4) | 2801(3)  | 3791(3)  | 31(1) |
| C(34) | 3267(4) | 3092(3)  | 4335(3)  | 22(1) |
| C(35) | 4357(4) | 3753(3)  | 3865(3)  | 26(1) |
| C(36) | 5576(4) | 4028(3)  | 4448(3)  | 24(1) |
| C(37) | 5738(3) | 3658(3)  | 5530(3)  | 19(1) |
| C(38) | 3501(3) | 2726(3)  | 5409(2)  | 18(1) |

**Table S26.** Bond lengths [ $\text{\AA}$ ] and angles [ $^\circ$ ] for  $[\text{Fe}(\text{BQA})_2]$ .

|             |          |             |          |
|-------------|----------|-------------|----------|
| Fe(1)-N(2)  | 1.922(3) | N(2)-C(10)  | 1.380(4) |
| Fe(1)-N(22) | 1.928(3) | N(3)-C(17)  | 1.316(4) |
| Fe(1)-N(3)  | 1.942(2) | N(3)-C(18)  | 1.376(4) |
| Fe(1)-N(1)  | 1.946(2) | N(21)-C(21) | 1.337(4) |
| Fe(1)-N(23) | 1.946(3) | N(21)-C(29) | 1.367(4) |
| Fe(1)-N(21) | 1.947(3) | N(22)-C(28) | 1.372(4) |
| N(1)-C(1)   | 1.322(4) | N(22)-C(30) | 1.374(4) |
| N(1)-C(9)   | 1.371(4) | N(23)-C(37) | 1.334(4) |
| N(2)-C(8)   | 1.378(4) | N(23)-C(38) | 1.377(4) |

|             |          |                   |            |
|-------------|----------|-------------------|------------|
| C(1)-C(2)   | 1.413(4) | C(25)-H(25)       | 0.9500     |
| C(1)-H(1)   | 0.9500   | C(26)-C(27)       | 1.401(5)   |
| C(2)-C(3)   | 1.352(5) | C(26)-H(26)       | 0.9500     |
| C(2)-H(2)   | 0.9500   | C(27)-C(28)       | 1.389(5)   |
| C(3)-C(4)   | 1.414(5) | C(27)-H(27)       | 0.9500     |
| C(3)-H(3)   | 0.9500   | C(28)-C(29)       | 1.439(4)   |
| C(4)-C(5)   | 1.408(5) | C(30)-C(31)       | 1.386(5)   |
| C(4)-C(9)   | 1.421(4) | C(30)-C(38)       | 1.443(5)   |
| C(5)-C(6)   | 1.367(6) | C(31)-C(32)       | 1.412(5)   |
| C(5)-H(5)   | 0.9500   | C(31)-H(31)       | 0.9500     |
| C(6)-C(7)   | 1.414(5) | C(32)-C(33)       | 1.368(6)   |
| C(6)-H(6)   | 0.9500   | C(32)-H(32)       | 0.9500     |
| C(7)-C(8)   | 1.381(5) | C(33)-C(34)       | 1.409(5)   |
| C(7)-H(7)   | 0.9500   | C(33)-H(33)       | 0.9500     |
| C(8)-C(9)   | 1.436(5) | C(34)-C(38)       | 1.411(4)   |
| C(10)-C(11) | 1.380(5) | C(34)-C(35)       | 1.419(5)   |
| C(10)-C(18) | 1.434(4) | C(35)-C(36)       | 1.362(5)   |
| C(11)-C(12) | 1.419(5) | C(35)-H(35)       | 0.9500     |
| C(11)-H(11) | 0.9500   | C(36)-C(37)       | 1.410(4)   |
| C(12)-C(13) | 1.359(5) | C(36)-H(36)       | 0.9500     |
| C(12)-H(12) | 0.9500   | C(37)-H(37)       | 0.9500     |
| C(13)-C(14) | 1.400(5) |                   |            |
| C(13)-H(13) | 0.9500   | N(2)-Fe(1)-N(22)  | 179.48(12) |
| C(14)-C(15) | 1.405(5) | N(2)-Fe(1)-N(3)   | 83.29(11)  |
| C(14)-C(18) | 1.421(4) | N(22)-Fe(1)-N(3)  | 96.97(11)  |
| C(15)-C(16) | 1.360(5) | N(2)-Fe(1)-N(1)   | 82.95(11)  |
| C(15)-H(15) | 0.9500   | N(22)-Fe(1)-N(1)  | 96.79(11)  |
| C(16)-C(17) | 1.412(4) | N(3)-Fe(1)-N(1)   | 166.24(12) |
| C(16)-H(16) | 0.9500   | N(2)-Fe(1)-N(23)  | 96.58(12)  |
| C(17)-H(17) | 0.9500   | N(22)-Fe(1)-N(23) | 82.97(11)  |
| C(21)-C(22) | 1.409(5) | N(3)-Fe(1)-N(23)  | 90.82(10)  |
| C(21)-H(21) | 0.9500   | N(1)-Fe(1)-N(23)  | 90.86(10)  |
| C(22)-C(23) | 1.363(6) | N(2)-Fe(1)-N(21)  | 97.46(12)  |
| C(22)-H(22) | 0.9500   | N(22)-Fe(1)-N(21) | 82.99(11)  |
| C(23)-C(24) | 1.411(5) | N(3)-Fe(1)-N(21)  | 90.31(10)  |
| C(23)-H(23) | 0.9500   | N(1)-Fe(1)-N(21)  | 91.37(10)  |
| C(24)-C(25) | 1.412(5) | N(23)-Fe(1)-N(21) | 165.95(12) |
| C(24)-C(29) | 1.421(4) | C(1)-N(1)-C(9)    | 119.2(3)   |
| C(25)-C(26) | 1.361(5) | C(1)-N(1)-Fe(1)   | 128.0(2)   |

|                   |            |                   |          |
|-------------------|------------|-------------------|----------|
| C(9)-N(1)-Fe(1)   | 112.7(2)   | C(7)-C(8)-C(9)    | 116.7(3) |
| C(8)-N(2)-C(10)   | 128.5(3)   | N(1)-C(9)-C(4)    | 121.3(3) |
| C(8)-N(2)-Fe(1)   | 116.0(2)   | N(1)-C(9)-C(8)    | 116.6(3) |
| C(10)-N(2)-Fe(1)  | 115.5(2)   | C(4)-C(9)-C(8)    | 122.1(3) |
| C(17)-N(3)-C(18)  | 118.9(3)   | C(11)-C(10)-N(2)  | 131.3(3) |
| C(17)-N(3)-Fe(1)  | 128.5(2)   | C(11)-C(10)-C(18) | 116.5(3) |
| C(18)-N(3)-Fe(1)  | 112.55(19) | N(2)-C(10)-C(18)  | 112.1(3) |
| C(21)-N(21)-C(29) | 119.0(3)   | C(10)-C(11)-C(12) | 121.0(3) |
| C(21)-N(21)-Fe(1) | 128.4(2)   | C(10)-C(11)-H(11) | 119.5    |
| C(29)-N(21)-Fe(1) | 112.6(2)   | C(12)-C(11)-H(11) | 119.5    |
| C(28)-N(22)-C(30) | 128.6(3)   | C(13)-C(12)-C(11) | 122.1(4) |
| C(28)-N(22)-Fe(1) | 115.6(2)   | C(13)-C(12)-H(12) | 118.9    |
| C(30)-N(22)-Fe(1) | 115.7(2)   | C(11)-C(12)-H(12) | 118.9    |
| C(37)-N(23)-C(38) | 119.1(3)   | C(12)-C(13)-C(14) | 119.7(3) |
| C(37)-N(23)-Fe(1) | 128.0(2)   | C(12)-C(13)-H(13) | 120.2    |
| C(38)-N(23)-Fe(1) | 112.9(2)   | C(14)-C(13)-H(13) | 120.2    |
| N(1)-C(1)-C(2)    | 122.5(3)   | C(13)-C(14)-C(15) | 123.9(3) |
| N(1)-C(1)-H(1)    | 118.8      | C(13)-C(14)-C(18) | 118.5(3) |
| C(2)-C(1)-H(1)    | 118.8      | C(15)-C(14)-C(18) | 117.6(3) |
| C(3)-C(2)-C(1)    | 119.3(3)   | C(16)-C(15)-C(14) | 120.2(3) |
| C(3)-C(2)-H(2)    | 120.3      | C(16)-C(15)-H(15) | 119.9    |
| C(1)-C(2)-H(2)    | 120.3      | C(14)-C(15)-H(15) | 119.9    |
| C(2)-C(3)-C(4)    | 120.2(3)   | C(15)-C(16)-C(17) | 119.1(3) |
| C(2)-C(3)-H(3)    | 119.9      | C(15)-C(16)-H(16) | 120.5    |
| C(4)-C(3)-H(3)    | 119.9      | C(17)-C(16)-H(16) | 120.5    |
| C(5)-C(4)-C(3)    | 124.2(3)   | N(3)-C(17)-C(16)  | 122.9(3) |
| C(5)-C(4)-C(9)    | 118.3(3)   | N(3)-C(17)-H(17)  | 118.5    |
| C(3)-C(4)-C(9)    | 117.5(3)   | C(16)-C(17)-H(17) | 118.5    |
| C(6)-C(5)-C(4)    | 119.7(3)   | N(3)-C(18)-C(14)  | 121.3(3) |
| C(6)-C(5)-H(5)    | 120.2      | N(3)-C(18)-C(10)  | 116.4(3) |
| C(4)-C(5)-H(5)    | 120.2      | C(14)-C(18)-C(10) | 122.2(3) |
| C(5)-C(6)-C(7)    | 122.0(4)   | N(21)-C(21)-C(22) | 121.9(3) |
| C(5)-C(6)-H(6)    | 119.0      | N(21)-C(21)-H(21) | 119.1    |
| C(7)-C(6)-H(6)    | 119.0      | C(22)-C(21)-H(21) | 119.1    |
| C(8)-C(7)-C(6)    | 121.2(4)   | C(23)-C(22)-C(21) | 120.1(3) |
| C(8)-C(7)-H(7)    | 119.4      | C(23)-C(22)-H(22) | 120.0    |
| C(6)-C(7)-H(7)    | 119.4      | C(21)-C(22)-H(22) | 120.0    |
| N(2)-C(8)-C(7)    | 131.5(3)   | C(22)-C(23)-C(24) | 119.6(3) |
| N(2)-C(8)-C(9)    | 111.7(3)   | C(22)-C(23)-H(23) | 120.2    |

|                   |          |                   |          |
|-------------------|----------|-------------------|----------|
| C(24)-C(23)-H(23) | 120.2    | C(30)-C(31)-H(31) | 119.5    |
| C(23)-C(24)-C(25) | 123.6(3) | C(32)-C(31)-H(31) | 119.5    |
| C(23)-C(24)-C(29) | 117.5(3) | C(33)-C(32)-C(31) | 122.9(4) |
| C(25)-C(24)-C(29) | 118.8(3) | C(33)-C(32)-H(32) | 118.5    |
| C(26)-C(25)-C(24) | 119.1(3) | C(31)-C(32)-H(32) | 118.5    |
| C(26)-C(25)-H(25) | 120.4    | C(32)-C(33)-C(34) | 118.5(3) |
| C(24)-C(25)-H(25) | 120.4    | C(32)-C(33)-H(33) | 120.7    |
| C(25)-C(26)-C(27) | 122.8(4) | C(34)-C(33)-H(33) | 120.7    |
| C(25)-C(26)-H(26) | 118.6    | C(33)-C(34)-C(38) | 119.1(3) |
| C(27)-C(26)-H(26) | 118.6    | C(33)-C(34)-C(35) | 123.5(3) |
| C(28)-C(27)-C(26) | 120.9(3) | C(38)-C(34)-C(35) | 117.4(3) |
| C(28)-C(27)-H(27) | 119.5    | C(36)-C(35)-C(34) | 120.5(3) |
| C(26)-C(27)-H(27) | 119.5    | C(36)-C(35)-H(35) | 119.8    |
| N(22)-C(28)-C(27) | 131.1(3) | C(34)-C(35)-H(35) | 119.8    |
| N(22)-C(28)-C(29) | 112.0(3) | C(35)-C(36)-C(37) | 119.0(3) |
| C(27)-C(28)-C(29) | 116.9(3) | C(35)-C(36)-H(36) | 120.5    |
| N(21)-C(29)-C(24) | 121.9(3) | C(37)-C(36)-H(36) | 120.5    |
| N(21)-C(29)-C(28) | 116.6(3) | N(23)-C(37)-C(36) | 122.5(3) |
| C(24)-C(29)-C(28) | 121.4(3) | N(23)-C(37)-H(37) | 118.8    |
| N(22)-C(30)-C(31) | 131.7(3) | C(36)-C(37)-H(37) | 118.8    |
| N(22)-C(30)-C(38) | 112.2(3) | N(23)-C(38)-C(34) | 121.6(3) |
| C(31)-C(30)-C(38) | 116.1(3) | N(23)-C(38)-C(30) | 116.0(3) |
| C(30)-C(31)-C(32) | 121.0(4) | C(34)-C(38)-C(30) | 122.4(3) |

**Table S27.** Anisotropic displacement parameters ( $\text{\AA}^2 \times 10^3$ ) for  $[\text{Fe}(\text{BQA})_2]$ .

The anisotropic displacement factor exponent takes the form:

$$-2h^2 [ h^2 a^*2U^{11} + \dots + 2hk a^* b^* U^{12} ]$$

|       | $U^{11}$ | $U^{22}$ | $U^{33}$ | $U^{23}$ | $U^{13}$ | $U^{12}$ |
|-------|----------|----------|----------|----------|----------|----------|
| Fe(1) | 26(1)    | 9(1)     | 10(1)    | 1(1)     | 6(1)     | 10(1)    |
| N(1)  | 33(2)    | 13(1)    | 10(1)    | 5(1)     | 11(1)    | 13(1)    |
| N(2)  | 20(2)    | 14(1)    | 16(1)    | -1(1)    | 2(1)     | 7(1)     |
| N(3)  | 29(2)    | 9(1)     | 9(1)     | 4(1)     | 7(1)     | 9(1)     |
| N(21) | 35(2)    | 10(1)    | 13(1)    | 1(1)     | 6(1)     | 16(1)    |
| N(22) | 23(2)    | 12(1)    | 12(1)    | 4(1)     | 7(1)     | 9(1)     |

|       |       |       |       |        |       |       |
|-------|-------|-------|-------|--------|-------|-------|
| N(23) | 28(2) | 9(1)  | 16(1) | -1(1)  | 10(1) | 9(1)  |
| C(1)  | 35(2) | 15(2) | 16(1) | 7(1)   | 14(1) | 13(2) |
| C(2)  | 51(3) | 18(2) | 22(2) | 7(1)   | 18(2) | 22(2) |
| C(3)  | 57(3) | 11(2) | 16(2) | 4(1)   | 17(2) | 17(2) |
| C(4)  | 46(2) | 14(2) | 12(1) | 1(1)   | 10(1) | 13(2) |
| C(5)  | 50(3) | 15(2) | 26(2) | -6(1)  | 2(2)  | 10(2) |
| C(6)  | 40(3) | 24(2) | 45(2) | -12(2) | -7(2) | 8(2)  |
| C(7)  | 37(2) | 23(2) | 45(2) | -9(2)  | -1(2) | 14(2) |
| C(8)  | 31(2) | 12(2) | 16(2) | -1(1)  | 1(1)  | 8(2)  |
| C(9)  | 36(2) | 11(2) | 12(1) | 3(1)   | 8(1)  | 9(2)  |
| C(10) | 30(2) | 17(2) | 18(2) | 2(1)   | 6(1)  | 14(2) |
| C(11) | 31(2) | 26(2) | 37(2) | -3(2)  | 4(2)  | 14(2) |
| C(12) | 31(2) | 33(2) | 47(2) | 1(2)   | 11(2) | 21(2) |
| C(13) | 40(2) | 29(2) | 28(2) | 5(2)   | 12(2) | 25(2) |
| C(14) | 40(2) | 21(2) | 12(1) | 5(1)   | 8(1)  | 23(2) |
| C(15) | 46(2) | 20(2) | 16(2) | 0(1)   | 7(2)  | 22(2) |
| C(16) | 40(2) | 13(2) | 20(2) | -2(1)  | 2(2)  | 13(2) |
| C(17) | 29(2) | 15(2) | 17(2) | -1(1)  | 4(1)  | 11(2) |
| C(18) | 25(2) | 16(2) | 11(1) | 3(1)   | 6(1)  | 12(1) |
| C(21) | 41(2) | 20(2) | 13(1) | 2(1)   | 5(1)  | 21(2) |
| C(22) | 57(3) | 27(2) | 12(2) | 4(1)   | 6(2)  | 31(2) |
| C(23) | 55(3) | 20(2) | 18(2) | 11(1)  | 19(2) | 23(2) |
| C(24) | 48(2) | 17(2) | 16(2) | 5(1)   | 16(2) | 20(2) |
| C(25) | 42(2) | 22(2) | 28(2) | 6(2)   | 21(2) | 13(2) |
| C(26) | 32(2) | 23(2) | 34(2) | 5(2)   | 19(2) | 9(2)  |
| C(27) | 30(2) | 23(2) | 26(2) | 3(1)   | 10(2) | 14(2) |
| C(28) | 30(2) | 15(2) | 15(1) | 4(1)   | 10(1) | 14(2) |
| C(29) | 30(2) | 11(2) | 14(1) | 3(1)   | 10(1) | 12(1) |
| C(30) | 33(2) | 13(2) | 12(1) | 2(1)   | 4(1)  | 13(2) |
| C(31) | 30(2) | 28(2) | 23(2) | 4(2)   | 2(2)  | 15(2) |
| C(32) | 38(2) | 34(2) | 27(2) | 1(2)   | -6(2) | 20(2) |
| C(33) | 51(3) | 29(2) | 16(2) | 0(2)   | 0(2)  | 24(2) |
| C(34) | 44(2) | 13(2) | 13(1) | 2(1)   | 6(1)  | 17(2) |
| C(35) | 59(3) | 16(2) | 11(1) | 5(1)   | 13(2) | 22(2) |
| C(36) | 46(2) | 15(2) | 19(2) | 5(1)   | 16(2) | 16(2) |
| C(37) | 33(2) | 13(2) | 15(1) | 4(1)   | 12(1) | 12(2) |
| C(38) | 32(2) | 11(2) | 12(1) | 0(1)   | 6(1)  | 12(1) |

---



**Table S28.** Hydrogen coordinates ( $\times 10^4$ ) and isotropic displacement parameters ( $\text{\AA}^2 \times 10^3$ ) for  $[\text{Fe}(\text{BQA})_2]$ .

|       | x    | y     | z     | U(eq) |
|-------|------|-------|-------|-------|
| H(1)  | 3325 | 3841  | 7909  | 24    |
| H(2)  | 3926 | 5816  | 8747  | 32    |
| H(3)  | 6080 | 7123  | 9543  | 31    |
| H(5)  | 8442 | 7499  | 9963  | 40    |
| H(6)  | 9888 | 6768  | 9793  | 51    |
| H(7)  | 9188 | 4792  | 8916  | 44    |
| H(11) | 9122 | 3399  | 8157  | 38    |
| H(12) | 9640 | 1919  | 7495  | 41    |
| H(13) | 8062 | 44    | 6573  | 33    |
| H(15) | 5655 | -1424 | 5872  | 29    |
| H(16) | 3528 | -1779 | 5671  | 30    |
| H(17) | 3116 | -198  | 6277  | 24    |
| H(21) | 6082 | 2106  | 9798  | 26    |
| H(22) | 5319 | 1059  | 11299 | 34    |
| H(23) | 3109 | -81   | 11172 | 32    |
| H(25) | 795  | -782  | 10025 | 35    |
| H(26) | -523 | -781  | 8374  | 36    |
| H(27) | 307  | 319   | 6939  | 30    |
| H(31) | 513  | 1331  | 5726  | 32    |
| H(32) | 146  | 1993  | 3971  | 41    |
| H(33) | 1800 | 3036  | 3067  | 38    |
| H(35) | 4236 | 4005  | 3138  | 31    |
| H(36) | 6305 | 4461  | 4130  | 29    |
| H(37) | 6592 | 3872  | 5943  | 23    |

## References:

- [1] L. Krause, R. Herbst-Irmer, G. M. Sheldrick, D. Stalke, *J. Appl. Cryst.* **2015**, 48, 3.
- [2] G. M. Sheldrick, *Acta Cryst.* **2015**, A71, 3.
- [3] G. M. Sheldrick, *Acta Cryst.* **2015**, C71, 3.
- [4] <https://www.ccdc.cam.ac.uk/structures/>
- [5] A. L. Spek, *Acta Cryst.* **2015**, C71, 9.
- [6] A. L. Spek, *Acta Cryst.* **2009**, D65, 148.
- [7] P. Müller, *Cryst. Rev.* 2009, 15(1), 57.
- [8] A. Thorn, B. Dittrich, G. M. Sheldrick, *Acta Cryst.* **2012**, A68, 448.
